# Supplementary material for: Multicomponent hydrosulfonylation of alkynes for the synthesis of vinyl sulfones
Source: Royal Society of Chemistry journal article supplement (doi:10.1039/d3gc02284f), 2023-01-01
Supplement: d3gc02284f1.pdf [file d3gc02284f1.pdf]

# Supporting Information

## Multicomponent hydrosulfonylation of alkynes for the synthesis of vinyl sulfones

Lan Mei,<sup>a</sup> Xiao-Rong Shu,<sup>a</sup> Fa-Liang Liu,<sup>a</sup> Jiao-Zhe Li,<sup>a</sup> Jian-Feng Zhang,<sup>a</sup> Keqi Tang,<sup>\*a</sup> and Wen-Ting Wei<sup>\*a</sup>

<sup>a</sup> School of Materials Science and Chemical Engineering, Institute of Mass Spectrometry, Ningbo

University, Ningbo, Zhejiang, 315211, China.

E-mail: [weiwenting@nbu.edu.cn](mailto:weiwenting@nbu.edu.cn); [tangkeqi@nbu.edu.cn](mailto:tangkeqi@nbu.edu.cn).

### List of Contents

|                                                                       |         |
|-----------------------------------------------------------------------|---------|
| (A) General information.....                                          | S2      |
| (B) Typical experimental procedures.....                              | S2-S3   |
| (C) Mechanistic studies.....                                          | S3-S7   |
| (D) Analytical data.....                                              | S8-S12  |
| (E) References.....                                                   | S13     |
| (F) Spectra .....                                                     | S14-S44 |
| (G) The X-ray single-crystal diffraction analysis of product 4a ..... | S45-S52 |

## (A) General information

All chemicals were obtained from commercial sources and were used as received unless otherwise noted. The progress of the reactions was monitored by TLC with silica gel plates and the visualization was carried out under UV light (254 nm).  $^1\text{H}$  NMR,  $^{13}\text{C}$  NMR, and  $^{19}\text{F}$  NMR spectra were recorded on Bruker 400 (400, 101, and 376 MHz) or Bruker 500 (500, 126, and 471 MHz) advance spectrometer at room temperature in  $\text{CDCl}_3$  (solvent signals,  $\delta$  7.26 and 77.0 ppm) using TMS as internal standard. HRMS spectra were recorded on an electrospray ionization quadrupole time-of-flight (ESI-Q-TOF) mass spectrometer.

## (B) Typical experimental procedures

### (1) General procedure for synthesis of compounds 4.

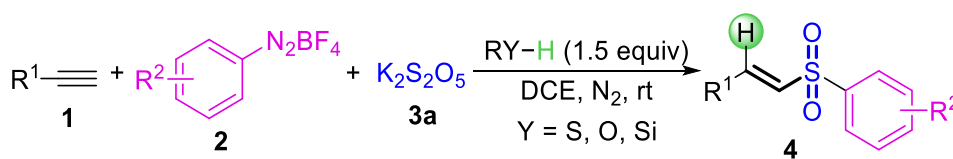

To a dry 10 mL schlenk tube was added **1** (0.2 mmol), **2** (1.2 equiv, 0.24 mmol), **3a** (2.0 equiv, 0.6 mmol) and RY-H (1.5 equiv, 0.3 mmol). The tube was sealed, evacuated and backfilled with nitrogen three times, then 1,2-dichloroethane (DCE) (2.0 mL) was added. The resulting solution was stirred under nitrogen atmosphere at room temperature for about 10 h until complete consumption of starting material as monitored by TLC and/or gas chromatography-mass spectrometry (GC-MS) analysis. After completion of the reaction, the solvent was removed under reduced pressure, and the residue was purified by flash silica gel column chromatography (petroleum ether/ethyl acetate) to afford the desired products **4**.

## (2) Gram-scale experiment

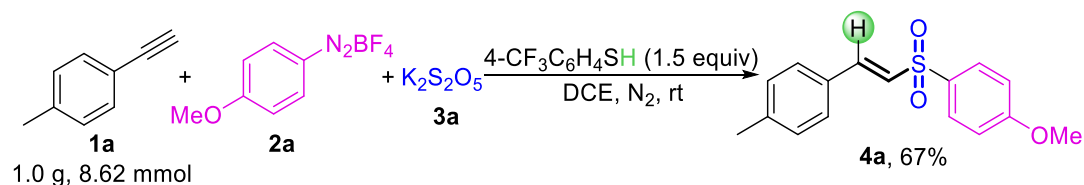

To a dry 50 mL branched spherical flask was added **3a** (2.0 equiv, 17.24 mmol, 3832.6 mg), **2a** (1.2 equiv, 10.34 mmol, 2295.0 mg). The tube was sealed, evacuated and backfilled with nitrogen three times, then DCE (10.0 mL), 4-CF<sub>3</sub>C<sub>6</sub>H<sub>4</sub>SH (1.5 equiv, 12.93 mmol, 2303.7 mg) and **1a** (8.62 mmol, 1000.0 mg) were sequentially added. The resulting solution was stirred under nitrogen atmosphere at room temperature for about 36 h until complete consumption of starting material as monitored by TLC and/or GC-MS analysis. After completion of the reaction, the solvent was removed under reduced pressure, and the residue was purified by flash silica gel column chromatography (petroleum ether/ethyl acetate = 3/1) to afford the desired product **4a**.

## (C) Mechanistic studies

### (1) Radical trapping experiment

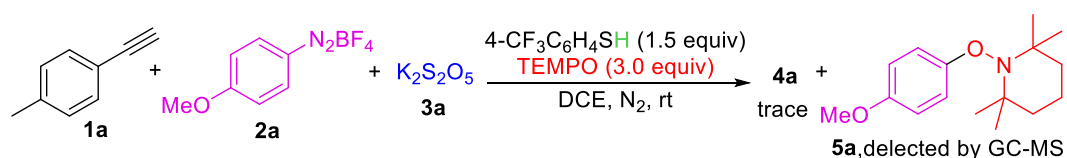

To a dry 10 mL branched spherical flask was added **3a** (2.0 equiv, 0.4 mmol, 88.9 mg), **2a** (1.2 equiv, 0.24 mmol, 53.3 mg), 2,2,6,6-tetramethyl-1-piperidinyloxy (TEMPO) (3.0 equiv, 0.6 mmol, 93.8 mg). The tube was sealed, evacuated and backfilled with nitrogen three times, then DCE (2.0 mL), 4-CF<sub>3</sub>C<sub>6</sub>H<sub>4</sub>SH (1.5 equiv, 0.3 mmol, 53.5 mg) and **1a** (0.2 mmol, 23.2 mg) were sequentially added. The resulting solution was stirred under nitrogen atmosphere at room temperature for about 10 h. In

this reaction, the formation of **4a** was completely suppressed. Moreover, GC-MS analysis of this reaction mixture showed that the TEMPO-trapped product **5a** was formed.

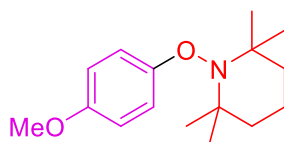

Chemical Formula: C<sub>16</sub>H<sub>25</sub>NO<sub>2</sub>

Molecular Weight: 263.3810

Mass spectrogram of **5a**:

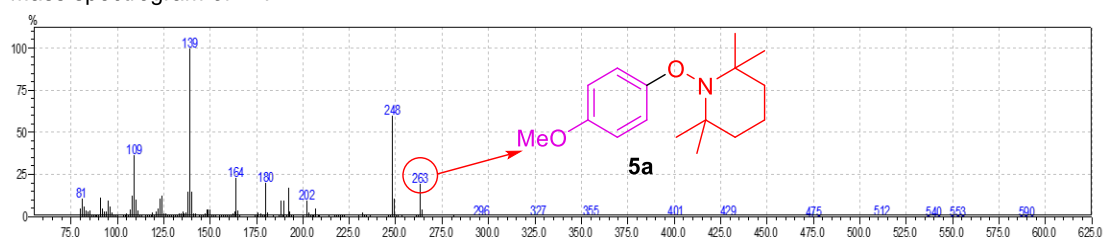

|        |      |       |        |       |       |        |       |        |
|--------|------|-------|--------|-------|-------|--------|-------|--------|
| 80.05  | 1865 | 4.87  | 103.10 | 375   | 0.98  | 126.15 | 862   | 2.25   |
| 81.05  | 4220 | 11.01 | 104.10 | 324   | 0.85  | 127.15 | 502   | 1.31   |
| 82.05  | 2307 | 6.02  | 105.05 | 749   | 1.95  | 128.15 | 394   | 1.03   |
| 83.05  | 1599 | 4.17  | 106.10 | 642   | 1.68  | 129.10 | 326   | 0.85   |
| 84.10  | 1354 | 3.53  | 107.05 | 1675  | 4.37  | 130.15 | 399   | 1.04   |
| 85.15  | 1561 | 4.07  | 108.05 | 4918  | 12.83 | 131.10 | 470   | 1.23   |
| 86.05  | 283  | 0.74  | 109.05 | 14105 | 36.80 | 132.05 | 440   | 1.15   |
| 87.10  | 305  | 0.80  | 110.10 | 3970  | 10.36 | 133.10 | 823   | 2.15   |
| 88.10  | 170  | 0.44  | 111.05 | 1517  | 3.96  | 134.10 | 705   | 1.84   |
| 89.05  | 621  | 1.62  | 112.15 | 451   | 1.18  | 135.10 | 1138  | 2.97   |
| 90.05  | 455  | 1.19  | 113.20 | 577   | 1.51  | 136.10 | 708   | 1.85   |
| 91.10  | 4276 | 11.16 | 114.10 | 210   | 0.55  | 137.10 | 922   | 2.41   |
| 92.05  | 2015 | 5.26  | 115.10 | 641   | 1.67  | 138.10 | 5754  | 15.01  |
| 93.05  | 1310 | 3.42  | 116.15 | 403   | 1.05  | 139.10 | 38327 | 100.00 |
| 94.10  | 1207 | 3.15  | 117.10 | 522   | 1.36  | 140.10 | 5711  | 14.90  |
| 95.10  | 3690 | 9.63  | 118.10 | 506   | 1.32  | 141.10 | 828   | 2.16   |
| 96.10  | 2450 | 6.39  | 119.05 | 1028  | 2.68  | 142.20 | 894   | 2.33   |
| 97.05  | 1075 | 2.80  | 120.10 | 598   | 1.56  | 143.20 | 252   | 0.66   |
| 98.10  | 550  | 1.44  | 121.10 | 1226  | 3.20  | 144.20 | 326   | 0.85   |
| 99.10  | 665  | 1.74  | 122.10 | 1844  | 4.81  | 145.10 | 406   | 1.06   |
| 100.10 | 246  | 0.64  | 123.05 | 4143  | 10.81 | 146.05 | 563   | 1.47   |
| 101.10 | 142  | 0.37  | 124.05 | 4896  | 12.77 | 147.10 | 698   | 1.82   |
| 102.10 | 204  | 0.53  | 125.10 | 919   | 2.40  | 148.10 | 1604  | 4.19   |

|        |      |       |        |      |       |               |             |              |
|--------|------|-------|--------|------|-------|---------------|-------------|--------------|
| 149.10 | 1710 | 4.46  | 189.90 | 3599 | 9.39  | 231.10        | 98          | 0.26         |
| 150.10 | 1644 | 4.29  | 191.05 | 622  | 1.62  | 232.10        | 1012        | 2.64         |
| 151.05 | 537  | 1.40  | 192.10 | 6524 | 17.02 | 233.10        | 289         | 0.75         |
| 152.10 | 401  | 1.05  | 193.10 | 1158 | 3.02  | 234.10        | 289         | 0.75         |
| 153.10 | 230  | 0.60  | 194.05 | 341  | 0.89  | 235.10        | 188         | 0.49         |
| 154.00 | 226  | 0.59  | 195.10 | 178  | 0.46  | 236.10        | 268         | 0.70         |
| 155.05 | 692  | 1.81  | 196.10 | 103  | 0.27  | 237.10        | 110         | 0.29         |
| 156.00 | 492  | 1.28  | 197.10 | 134  | 0.35  | 238.10        | 114         | 0.30         |
| 157.00 | 591  | 1.54  | 198.10 | 167  | 0.44  | 239.10        | 121         | 0.32         |
| 158.00 | 538  | 1.40  | 199.10 | 140  | 0.37  | 240.10        | 113         | 0.29         |
| 159.00 | 284  | 0.74  | 200.10 | 298  | 0.78  | 241.10        | 71          | 0.19         |
| 160.10 | 583  | 1.52  | 201.10 | 234  | 0.61  | 242.10        | 100         | 0.26         |
| 161.05 | 479  | 1.25  | 202.10 | 3807 | 9.93  | 243.10        | 110         | 0.29         |
| 162.10 | 770  | 2.01  | 203.00 | 1092 | 2.85  | 244.10        | 73          | 0.19         |
| 163.10 | 1094 | 2.85  | 204.10 | 636  | 1.66  | 245.10        | 158         | 0.41         |
| 164.05 | 8935 | 23.31 | 205.05 | 513  | 1.34  | 246.10        | 394         | 1.03         |
| 165.10 | 1369 | 3.57  | 206.00 | 204  | 0.53  | 247.15        | 429         | 1.12         |
| 166.10 | 326  | 0.85  | 207.00 | 1956 | 5.10  | 248.15        | 23058       | 60.16        |
| 167.10 | 169  | 0.44  | 208.05 | 483  | 1.26  | 249.15        | 4148        | 10.82        |
| 168.10 | 116  | 0.30  | 209.00 | 286  | 0.75  | 250.10        | 644         | 1.68         |
| 169.10 | 190  | 0.50  | 210.00 | 95   | 0.25  | 251.10        | 223         | 0.58         |
| 170.10 | 143  | 0.37  | 211.00 | 143  | 0.37  | 252.10        | 114         | 0.30         |
| 171.10 | 186  | 0.49  | 212.00 | 78   | 0.20  | 253.10        | 223         | 0.58         |
| 172.10 | 218  | 0.57  | 213.00 | 106  | 0.28  | 254.10        | 134         | 0.35         |
| 173.10 | 210  | 0.55  | 214.00 | 313  | 0.82  | 255.10        | 47          | 0.12         |
| 174.05 | 430  | 1.12  | 215.00 | 140  | 0.37  | 256.10        | 113         | 0.29         |
| 175.05 | 575  | 1.50  | 216.00 | 166  | 0.43  | 257.10        | 57          | 0.15         |
| 176.00 | 966  | 2.52  | 217.10 | 647  | 1.69  | 258.10        | 63          | 0.16         |
| 177.05 | 859  | 2.24  | 218.10 | 279  | 0.73  | 259.10        | 52          | 0.14         |
| 178.10 | 506  | 1.32  | 219.10 | 329  | 0.86  | 260.10        | 84          | 0.22         |
| 179.10 | 606  | 1.58  | 220.05 | 588  | 1.53  | 261.10        | 577         | 1.51         |
| 180.10 | 7783 | 20.31 | 221.10 | 302  | 0.79  | 262.15        | 362         | 0.94         |
| 181.10 | 1022 | 2.67  | 222.10 | 226  | 0.59  | <b>263.20</b> | <b>7478</b> | <b>19.51</b> |
| 182.10 | 204  | 0.53  | 223.10 | 98   | 0.26  | 264.20        | 1602        | 4.18         |
| 183.10 | 159  | 0.41  | 224.10 | 79   | 0.21  | 265.20        | 236         | 0.62         |
| 184.10 | 233  | 0.61  | 225.10 | 130  | 0.34  | 266.20        | 105         | 0.27         |
| 185.10 | 114  | 0.30  | 226.10 | 81   | 0.21  | 267.20        | 129         | 0.34         |
| 186.10 | 194  | 0.51  | 227.10 | 95   | 0.25  | 268.20        | 86          | 0.22         |
| 186.95 | 390  | 1.02  | 228.10 | 100  | 0.26  | 269.20        | 70          | 0.18         |
| 187.95 | 3618 | 9.44  | 229.10 | 62   | 0.16  |               |             |              |
| 188.95 | 607  | 1.58  | 230.10 | 329  | 0.86  |               |             |              |

## (2) Radical clock experiment

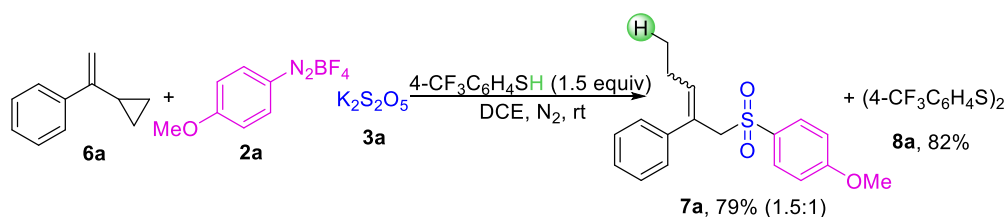

To a dry 10 mL branched spherical flask was added **3a** (2.0 equiv, 0.4 mmol, 88.9 mg), **2a** (1.2 equiv, 0.24 mmol, 53.3 mg). The tube was sealed, evacuated and backfilled with nitrogen three times, then DCE (2.0 mL), 4-CF<sub>3</sub>C<sub>6</sub>H<sub>4</sub>SH (1.5 equiv, 0.3 mmol, 53.5 mg) and **6a** (0.2 mmol, 28.8 mg) were sequentially added. The resulting solution was stirred under nitrogen atmosphere at room temperature for about 10 h until complete consumption of starting material as monitored by TLC and/or GC-MS analysis. After completion of the reaction, the solvent was removed under reduced pressure, and the residue was purified by flash silica gel column chromatography to afford the ring-opening product **7a** (49.9 mg, 79%, petroleum ether/ethyl acetate = 6:1) and the coupling product **8a** (58.1 mg, 82%, petroleum ether/ethyl acetate = 30:1).

## (3) Deuterium-labelling experiments

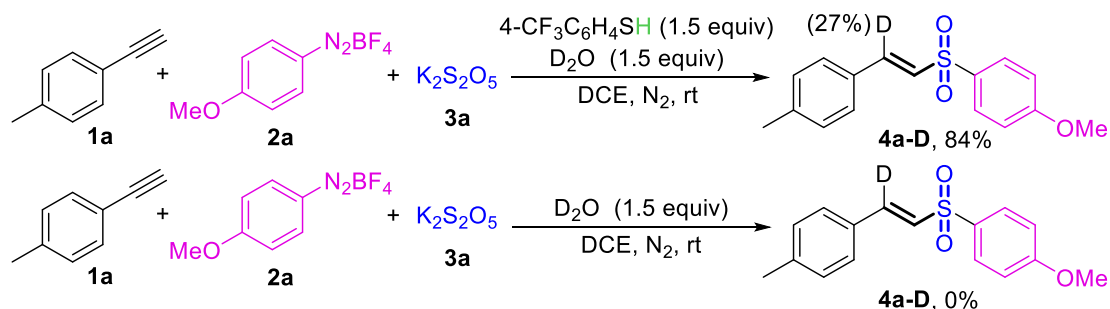

To a dry 10 mL branched spherical flask was added **3a** (2.0 equiv, 0.4 mmol, 88.9 mg), **2a** (1.2 equiv, 0.24 mmol, 53.3 mg). The tube was sealed, evacuated and backfilled with nitrogen three times, then DCE (2.0 mL), 4-CF<sub>3</sub>C<sub>6</sub>H<sub>4</sub>SH (1.5 equiv, 0.3 mmol,

53.5 mg), D<sub>2</sub>O (1.5 equiv, 0.3 mmol, 6.0 mg) and **1a** (0.2 mmol, 23.2 mg) were sequentially added. The resulting solution was stirred under nitrogen atmosphere at room temperature for about 10 h until complete consumption of starting material as monitored by TLC and/or gas chromatography-mass spectrometry (GC-MS) analysis. After completion of the reaction, the solvent was removed under reduced pressure, and the residue was purified by flash silica gel column chromatography (petroleum ether/ethyl acetate =3:1) to afford the desired product in 84% yield (27% of D).

To a dry 10 mL branched spherical flasks was added **3a** (2.0 equiv, 0.4 mmol, 88.9 mg), **2a** (1.2 equiv, 0.24 mmol, 53.3 mg). The tube was sealed, evacuated and backfilled with nitrogen three times, then DCE (2.0 mL), D<sub>2</sub>O (1.5 equiv, 0.3 mmol, 6.0 mg) and **1a** (0.2 mmol, 23.2 mg) were sequentially added. The resulting solution was stirred under nitrogen atmosphere at room temperature for about 10 h until complete consumption of starting material as monitored by TLC and/or gas chromatography-mass spectrometry (GC-MS) analysis.

## (D) Analytical data

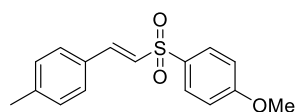

**(E)-1-Methoxy-4-((4-methylstyryl)sulfonyl)benzene (4a).**<sup>[1]</sup> The product was purified by silica gel column chromatography with petroleum ether/ethyl acetate (3:1, v/v). white solid (49.0 mg, 85% yield); <sup>1</sup>H NMR (400 MHz, CDCl<sub>3</sub>) δ: 7.86 (d, *J* = 8.8 Hz, 2H), 7.60 (d, *J* = 15.6 Hz, 1H), 7.36 (d, *J* = 8.0 Hz, 2H), 7.18 (d, *J* = 7.6 Hz, 2H), 7.00 (d, *J* = 8.8 Hz, 2H), 6.78 (d, *J* = 15.6 Hz, 1H), 3.87 (s, 3H), 2.36 (s, 3H); <sup>13</sup>C NMR (101 MHz, CDCl<sub>3</sub>) δ: 163.5, 141.6, 141.4, 132.4, 129.8, 129.7, 128.5, 126.7, 114.5, 55.7, 21.5.

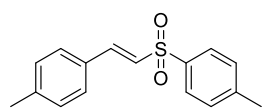

**(E)-1-Methyl-4-((4-methylstyryl)sulfonyl)benzene (4b).**<sup>[2]</sup> The product was purified by silica gel column chromatography with petroleum ether/ethyl acetate (3:1, v/v). white solid (44.1 mg, 81% yield); <sup>1</sup>H NMR (400 MHz, CDCl<sub>3</sub>) δ: 7.82 (d, *J* = 8.0 Hz, 2H), 7.62 (d, *J* = 15.2 Hz, 1H), 7.37-7.31 (m, 4H), 7.18 (d, *J* = 8.0 Hz, 2H), 6.80 (d, *J* = 15.2 Hz, 1H), 2.42 (s, 3H), 2.35 (s, 3H); <sup>13</sup>C NMR (101 MHz, CDCl<sub>3</sub>) δ: 144.1, 141.9, 141.6, 137.8, 129.8, 129.7, 129.4, 128.4, 127.5, 126.3, 21.5, 21.4.

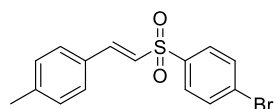

**(E)-1-Bromo-4-((4-methylstyryl)sulfonyl)benzene (4c).**<sup>[3]</sup> The product was purified by silica gel column chromatography with petroleum ether/ethyl acetate (3:1, v/v). white solid (50.4 mg, 75% yield); <sup>1</sup>H NMR (400 MHz, CDCl<sub>3</sub>) δ: 7.79 (d, *J* = 8.0 Hz, 2H), 7.65 (t, *J* = 7.6 Hz, 3H), 7.37 (d, *J* = 8.0 Hz, 2H), 7.19 (d, *J* = 8.0 Hz, 2H), 6.79 (d, *J* = 15.6 Hz, 1H), 2.36 (s, 3H); <sup>13</sup>C NMR (101 MHz, CDCl<sub>3</sub>) δ: 143.1, 142.0, 139.9, 132.5, 129.8, 129.3, 129.1, 128.6, 128.4, 125.4, 21.5.

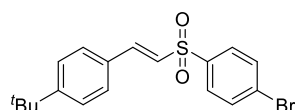

**(E)-1-Bromo-4-((4-*tert*-butylstyryl)sulfonyl)benzene (4d).** The product was purified by silica gel column chromatography with petroleum ether/ethyl acetate (3:1, v/v). white solid (59.0 mg, 78% yield); <sup>1</sup>H NMR (400 MHz, CDCl<sub>3</sub>) δ: 7.80 (d, *J* = 8.4 Hz, 2H), 7.68 (t, *J* = 8.0 Hz, 3H), 7.44-7.40 (m, 4H), 6.81 (d, *J* = 15.2 Hz, 1H), 1.30 (s, 9H); <sup>13</sup>C NMR (101 MHz, CDCl<sub>3</sub>) δ: 155.1, 143.0, 139.9, 132.5, 129.3, 129.0, 128.5, 128.4, 126.0, 125.6, 34.9, 31.0; HRMS *m/z* (ESI) calcd for C<sub>18</sub>H<sub>20</sub>BrO<sub>2</sub>S ([M+H]<sup>+</sup>) 379.0362, found 379.0368.

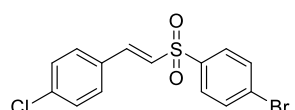

**(E)-1-Bromo-4-((4-chlorostyryl)sulfonyl)benzene (4e).**<sup>[4]</sup> The product was purified by silica gel column chromatography with petroleum ether/ethyl acetate (3:1, v/v). white solid (51.3 mg, 72% yield); <sup>1</sup>H NMR (400 MHz, CDCl<sub>3</sub>) δ: 7.80 (d, *J* = 8.4 Hz, 2H), 7.69 (d, *J* = 8.4 Hz, 2H), 7.63 (d, *J* = 15.2 Hz, 1H), 7.43-7.36 (m, 4H), 6.81 (d, *J* = 15.2 Hz, 1H); <sup>13</sup>C NMR (101 MHz, CDCl<sub>3</sub>) δ: 141.5, 139.5, 137.5, 132.7, 130.6, 129.8, 129.4, 129.2, 128.8, 127.4.

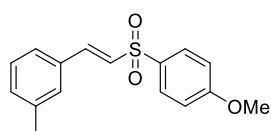

**(E)-1-(2-((4-Methoxyphenyl)sulfonyl)vinyl)-3-methylbenzene (4f).** The product was purified by silica gel column chromatography with petroleum ether/ethyl acetate (3:1, v/v). white solid (48.4 mg, 84% yield); <sup>1</sup>H NMR (400 MHz, CDCl<sub>3</sub>) δ: 7.78 (d, *J* = 8.8 Hz, 2H), 7.51 (d, *J* = 15.6 Hz, 1H), 7.18 (d, *J* = 4.8 Hz, 3H), 7.12 (d, *J* = 4.4 Hz, 1H), 6.91 (d, *J* = 8.8 Hz, 2H), 6.75 (d, *J* = 15.6 Hz, 1H), 3.77 (s, 3H), 2.25 (s, 3H); <sup>13</sup>C NMR (101 MHz, CDCl<sub>3</sub>) δ: 163.4, 141.4, 138.7, 132.3, 132.2, 131.7, 129.7, 128.9, 128.8, 127.6, 125.6, 114.4, 55.6, 21.1; HRMS *m/z* (ESI) calcd for C<sub>16</sub>H<sub>17</sub>O<sub>3</sub>S ([M+H]<sup>+</sup>) 289.0893, found 289.0889.



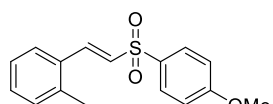

**(E)-1-(2-((4-Methoxyphenyl)sulfonyl)vinyl)-2-methylbenzene (4g).**

The product was purified by silica gel column chromatography with petroleum ether/ethyl acetate (3:1, v/v). white solid (47.8 mg, 83% yield);  $^1\text{H NMR}$  (400 MHz,  $\text{CDCl}_3$ )  $\delta$ : 7.80 (t,  $J = 12.4$  Hz, 3H), 7.32 (d,  $J = 7.6$  Hz, 1H), 7.18 (t,  $J = 7.6$  Hz, 1H), 7.11-7.06 (m, 2H), 6.91 (d,  $J = 8.8$  Hz, 2H), 6.68 (d,  $J = 15.2$  Hz, 1H), 3.76 (s, 3H), 2.34 (s, 3H);  $^{13}\text{C NMR}$  (101 MHz,  $\text{CDCl}_3$ )  $\delta$ : 163.4, 138.8, 137.9, 132.0, 131.2, 130.8, 130.6, 129.7, 128.7, 126.6, 126.3, 114.4, 55.6, 19.6; HRMS  $m/z$  (ESI) calcd for  $\text{C}_{16}\text{H}_{17}\text{O}_3\text{S}$  ( $[\text{M}+\text{H}]^+$ ) 289.0893, found 289.0889.

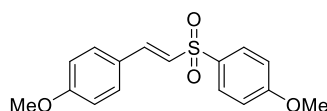

**(E)-1-Methoxy-4-(2-((4-methoxyphenyl)sulfonyl)vinyl)benzene (4h).**<sup>[1]</sup>

The product was purified by silica gel column chromatography with petroleum ether/ethyl acetate (3:1, v/v). white solid (52.9 mg, 87% yield);  $^1\text{H NMR}$  (400 MHz,  $\text{CDCl}_3$ )  $\delta$ : 7.85 (d,  $J = 8.4$  Hz, 2H), 7.57 (d,  $J = 15.2$  Hz, 1H), 7.41 (d,  $J = 8.0$  Hz, 2H), 6.99 (d,  $J = 8.4$  Hz, 2H), 6.88 (d,  $J = 8.0$  Hz, 2H), 6.69 (d,  $J = 15.6$  Hz, 1H), 3.86 (s, 3H), 3.82 (s, 3H);  $^{13}\text{C NMR}$  (101 MHz,  $\text{CDCl}_3$ )  $\delta$ : 163.3, 161.9, 141.1, 132.6, 130.2, 129.7, 125.1 (2), 114.4 (2), 55.6, 55.4.

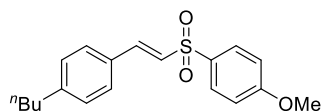

**(E)-1-Butyl-4-(2-((4-methoxyphenyl)sulfonyl)vinyl)benzene (4i).**

The product was purified by silica gel column chromatography with petroleum ether/ethyl acetate (3:1, v/v). white solid (55.5 mg, 84% yield);  $^1\text{H NMR}$  (400 MHz,  $\text{CDCl}_3$ )  $\delta$ : 7.86 (d,  $J = 8.4$  Hz, 2H), 7.60 (d,  $J = 15.6$  Hz, 1H), 7.38 (d,  $J = 8.0$  Hz, 2H), 7.19 (d,  $J = 8.0$  Hz, 2H), 7.00 (d,  $J = 8.8$  Hz, 2H), 6.79 (d,  $J = 15.6$  Hz, 1H), 3.86 (s, 3H), 2.61 (t,  $J = 8.0$  Hz, 2H), 1.63-1.56 (m, 2H), 1.36-1.30 (m, 2H), 0.91 (t,  $J = 7.2$  Hz, 3H);  $^{13}\text{C NMR}$  (101 MHz,  $\text{CDCl}_3$ )  $\delta$ : 163.4, 146.6, 141.5, 132.4, 129.9, 129.8, 129.1, 128.5, 126.7, 114.5, 55.6, 35.5, 33.3, 22.2, 13.9; HRMS  $m/z$  (ESI) calcd for  $\text{C}_{19}\text{H}_{23}\text{O}_3\text{S}$  ( $[\text{M}+\text{H}]^+$ ) 331.1362, found: 331.1360.

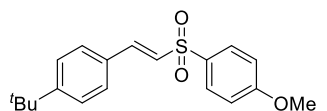

**(E)-1-(tert-Butyl)-4-(2-((4-methoxyphenyl)sulfonyl)vinyl)benzene (4j).**<sup>[5]</sup>

The product was purified by silica gel column chromatography with petroleum ether/ethyl acetate (3:1, v/v). white solid (54.8 mg, 83% yield);  $^1\text{H NMR}$  (400 MHz,  $\text{CDCl}_3$ )  $\delta$ : 7.86 (d,  $J = 8.8$  Hz, 2H), 7.62 (d,  $J = 15.6$  Hz, 1H), 7.42-7.39 (m, 4H), 7.00 (d,  $J = 8.8$  Hz, 2H), 6.80 (d,  $J = 15.2$  Hz, 1H), 3.87 (s, 3H), 1.31 (s, 9H);  $^{13}\text{C NMR}$  (101 MHz,  $\text{CDCl}_3$ )  $\delta$ : 163.4, 154.7, 141.4, 132.4, 129.8, 129.7, 128.3, 126.9, 126.0, 114.5, 55.7, 34.9, 31.1.

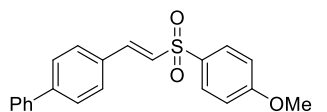

**(E)-4-(2-((4-Methoxyphenyl)sulfonyl)vinyl)-1,1'-biphenyl (4k).**

The product was purified by silica gel column chromatography with petroleum ether/ethyl acetate (3:1, v/v). white solid (56.7 mg, 81% yield);  $^1\text{H NMR}$  (500 MHz,  $\text{CDCl}_3$ )  $\delta$ : 7.89 (d,  $J = 9.0$  Hz, 2H), 7.67 (d,  $J = 15.5$  Hz, 1H), 7.62-7.58 (m, 4H), 7.54 (d,  $J = 8.0$  Hz, 2H), 7.45 (t,  $J = 7.5$  Hz, 2H), 7.37 (t,  $J = 7.5$  Hz, 1H), 7.01 (d,  $J = 9.0$  Hz, 2H), 6.88 (d,  $J = 15.0$  Hz, 1H), 3.87 (s, 3H);  $^{13}\text{C NMR}$  (126 MHz,  $\text{CDCl}_3$ )  $\delta$ : 163.5, 143.7, 140.9, 139.8, 132.2, 131.4, 129.9, 129.0, 128.9, 128.0, 127.6 (2), 127.0, 114.5, 55.7.; HRMS  $m/z$  (ESI) calcd for  $\text{C}_{21}\text{H}_{19}\text{O}_3\text{S}$  ( $[\text{M}+\text{H}]^+$ ) 351.1049, found: 351.1045.

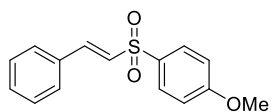

**(E)-1-Methoxy-4-(styrylsulfonyl)benzene (4l).**<sup>[1]</sup>

The product was purified by silica gel column chromatography with petroleum ether/ethyl acetate (3:1, v/v). white solid (43.9 mg, 80% yield);  $^1\text{H NMR}$  (400 MHz,  $\text{CDCl}_3$ )  $\delta$ : 7.86 (d,  $J = 8.8$  Hz, 2H), 7.62 (d,  $J = 15.6$  Hz, 1H), 7.45 (d,  $J = 7.6$  Hz, 2H), 7.37 (d,  $J = 6.4$  Hz, 3H), 6.99 (d,  $J = 8.8$  Hz, 2H), 6.85 (d,  $J = 15.2$  Hz, 1H), 3.85 (s, 3H);  $^{13}\text{C NMR}$  (101 MHz,

CDCl<sub>3</sub>)  $\delta$ : 163.4, 141.2, 132.3, 132.0, 130.9, 129.7, 128.9, 128.3, 127.8, 114.5, 55.6.

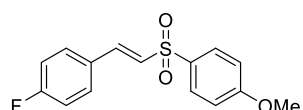

**(E)-1-Fluoro-4-(2-((4-methoxyphenyl)sulfonyl)vinyl)benzene (4m).**<sup>[6]</sup> The product was purified by silica gel column chromatography

with petroleum ether/ethyl acetate (3:1, v/v). white solid (44.4 mg, 76% yield); <sup>1</sup>H NMR (400 MHz, CDCl<sub>3</sub>)  $\delta$ : 7.84 (d, *J* = 8.8 Hz, 2H), 7.57 (d, *J* = 15.2 Hz, 1H), 7.44 (t, *J* = 6.8 Hz, 2H), 7.04 (t, *J* = 8.8 Hz, 2H), 6.98 (d, *J* = 8.8 Hz, 2H), 6.79 (d, *J* = 15.2 Hz, 1H), 3.84 (s, 3H); <sup>13</sup>C NMR (101 MHz, CDCl<sub>3</sub>)  $\delta$ : 164.0 (d, *J*<sub>C-F</sub> = 253.5 Hz), 163.4, 139.9, 131.9, 130.4 (d, *J*<sub>C-F</sub> = 8.8 Hz), 129.7, 128.6 (d, *J*<sub>C-F</sub> = 3.3 Hz), 127.6 (d, *J*<sub>C-F</sub> = 2.3 Hz), 116.1 (d, *J*<sub>C-F</sub> = 22.1 Hz), 114.5, 55.6; <sup>19</sup>F NMR (376 MHz, CDCl<sub>3</sub>)  $\delta$ : -108.1.

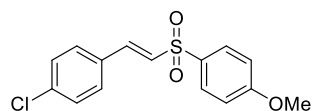

**(E)-1-Chloro-4-(2-((4-methoxyphenyl)sulfonyl)vinyl)benzene (4n).**<sup>[6]</sup> The product was purified by silica gel column

chromatography with petroleum ether/ethyl acetate (3:1, v/v). white solid (45.0 mg, 73% yield); <sup>1</sup>H NMR (400 MHz, CDCl<sub>3</sub>)  $\delta$ : 7.86 (d, *J* = 8.8 Hz, 2H), 7.57 (d, *J* = 15.6 Hz, 1H), 7.41-7.34 (m, 4H), 7.01 (d, *J* = 8.8 Hz, 2H), 6.82 (d, *J* = 15.6 Hz, 1H), 3.87 (s, 3H); <sup>13</sup>C NMR (101 MHz, CDCl<sub>3</sub>)  $\delta$ : 163.7, 139.8, 137.0, 131.9, 131.0, 129.9, 129.6, 129.3, 128.5, 114.6, 55.7.

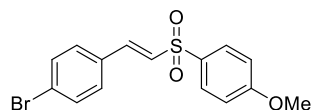

**(E)-1-Bromo-4-(2-((4-methoxyphenyl)sulfonyl)vinyl)benzene (4o).**

The product was purified by silica gel column chromatography with petroleum ether/ethyl acetate (3:1, v/v). white solid (50.7 mg, 72% yield); <sup>1</sup>H NMR (400 MHz, CDCl<sub>3</sub>)  $\delta$ : 7.86 (d, *J* = 8.8 Hz, 2H), 7.57-7.50 (m, 3H), 7.32 (d, *J* = 8.4 Hz, 2H), 7.01 (d, *J* = 8.8 Hz, 2H), 6.84 (d, *J* = 15.2 Hz, 1H), 3.87 (s, 3H); <sup>13</sup>C NMR (101 MHz, CDCl<sub>3</sub>)  $\delta$ : 163.6, 139.9, 132.3, 131.8, 131.4, 129.9, 129.8, 128.6, 125.4, 114.6, 55.7; HRMS *m/z* (ESI) calcd for C<sub>15</sub>H<sub>14</sub>BrO<sub>3</sub>S ([M+H]<sup>+</sup>) 352.9842, found: 352.9846.

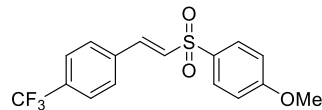

**(E)-1-Methoxy-4-((4-(trifluoromethyl)styryl)sulfonyl)benzene (4p).**<sup>[1]</sup> The product was purified by silica gel column

chromatography with petroleum ether/ethyl acetate (3:1, v/v). white solid (47.9 mg, 70% yield); <sup>1</sup>H NMR (500 MHz, CDCl<sub>3</sub>)  $\delta$ : 7.88 (d, *J* = 9.0 Hz, 2H), 7.66-7.63 (m, 3H), 7.58 (d, *J* = 8.5 Hz, 2H), 7.03 (d, *J* = 9.0 Hz, 2H), 6.94 (d, *J* = 15.5 Hz, 1H), 3.88 (s, 3H); <sup>13</sup>C NMR (126 MHz, CDCl<sub>3</sub>)  $\delta$ : 163.8, 139.3, 135.9, 132.4 (q, *J*<sub>C-F</sub> = 32.9 Hz), 131.5, 130.6, 130.0, 126.0 (q, *J*<sub>C-F</sub> = 3.8 Hz), 123.6 (q, *J*<sub>C-F</sub> = 272.9 Hz), 122.5, 114.7, 55.7; <sup>19</sup>F NMR (471 MHz, CDCl<sub>3</sub>)  $\delta$ : -63.0.

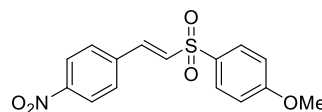

**(E)-1-Methoxy-4-((4-nitrostyryl)sulfonyl)benzene (4q).**<sup>[4]</sup> The

product was purified by silica gel column chromatography with petroleum ether/ethyl acetate (3:1, v/v). Yellow solid (35.7 mg, 56% yield); <sup>1</sup>H NMR (400 MHz, CDCl<sub>3</sub>)  $\delta$ : 8.24 (t, *J* = 7.6 Hz, 2H), 7.89 (t, *J* = 8.4 Hz, 2H), 7.67-7.52 (m, 4H), 7.03 (d, *J* = 9.2 Hz, 2H), 3.88 (s, 3H); <sup>13</sup>C NMR (101 MHz, CDCl<sub>3</sub>)  $\delta$ : 164.0, 147.9, 140.2, 138.1, 133.0, 132.3, 130.2, 129.1, 124.2, 114.8, 55.7.

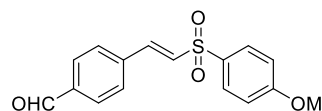

**(E)-4-(2-((4-methoxyphenyl)sulfonyl)vinyl)benzaldehyde (4r).**

The product was purified by silica gel column chromatography with petroleum ether/ethyl acetate (3:1, v/v). white solid (36.9 mg, 61% yield); <sup>1</sup>H NMR (400 MHz, CDCl<sub>3</sub>)  $\delta$ : 10.02 (s, 1H), 7.88-7.85 (m, 4H), 7.67-7.58 (m, 3H), 7.03-6.95 (m, 3H), 3.87 (s, 3H); <sup>13</sup>C NMR (101 MHz, CDCl<sub>3</sub>)  $\delta$ : 191.2, 163.8, 139.4, 138.0, 137.5, 131.4, 131.1, 130.2, 130.1, 128.9, 114.7, 55.7; HRMS *m/z* (ESI) calcd for C<sub>16</sub>H<sub>15</sub>O<sub>4</sub>S ([M+H]<sup>+</sup>) 303.0686, found: 303.0680.

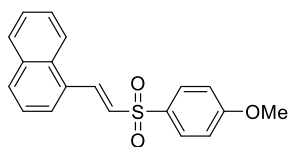

**(E)-1-(2-((4-Methoxyphenyl)sulfonyl)vinyl)naphthalene (4s).** The product was purified by silica gel column chromatography with petroleum ether/ethyl acetate (3:1, v/v). white solid (48.0 mg, 74% yield); <sup>1</sup>H NMR (500 MHz, CDCl<sub>3</sub>) δ: 8.46 (d, *J* = 15.0 Hz, 1H), 8.14 (d, *J* = 8.5 Hz, 1H), 7.93 (d, *J* = 9.0 Hz, 2H), 7.90-7.85 (m, 2H), 7.65- 7.52 (m, 3H), 7.43 (t, *J* = 8.0 Hz, 1H), 7.02 (d, *J* = 9.0 Hz, 2H), 6.95 (d, *J* = 15.0 Hz, 1H), 3.86 (s, 3H); <sup>13</sup>C NMR (126 MHz, CDCl<sub>3</sub>) δ: 163.6, 138.3, 133.6, 132.0, 131.2, 130.2, 129.9, 129.6, 128.8, 127.2, 126.4, 125.5, 125.3, 123.0, 114.6, 55.7; HRMS *m/z* (ESI) calcd for C<sub>19</sub>H<sub>17</sub>O<sub>3</sub>S ([M+H]<sup>+</sup>) 325.0893, found: 325.0897.

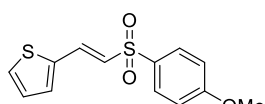

**(E)-2-(2-((4-Methoxyphenyl)sulfonyl)vinyl)thiophene (4t).** The product was purified by silica gel column chromatography with petroleum ether/ethyl acetate (5:1, v/v). Yellow solid (36.4 mg, 65% yield); <sup>1</sup>H NMR (500 MHz, CDCl<sub>3</sub>) δ: 7.86 (t, *J* = 7.0 Hz, 2H), 7.74 (d, *J* = 15.0 Hz, 1H), 7.42 (d, *J* = 5.0 Hz, 1H), 7.29 (d, *J* = 3.5 Hz, 1H), 7.06 (t, *J* = 4.5 Hz, 1H), 7.01 (d, *J* = 8.5 Hz, 2H), 6.63 (d, *J* = 15.5 Hz, 1H), 3.87 (s, 3H); <sup>13</sup>C NMR (126 MHz, CDCl<sub>3</sub>) δ: 163.5, 137.0, 134.0, 132.2, 132.1, 129.8, 129.7, 128.2, 126.1, 114.5, 55.7; HRMS *m/z* (ESI) calcd for C<sub>13</sub>H<sub>13</sub>O<sub>3</sub>S<sub>2</sub> ([M+H]<sup>+</sup>) 281.0301, found: 281.0307.

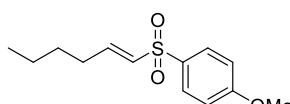

**(E)-1-(Hex-1-en-1-ylsulfonyl)-4-methoxybenzene (4u).** The product was purified by silica gel column chromatography with petroleum ether/ethyl acetate (10:1, v/v). Yellow oil (27.4 mg, 54% yield); <sup>1</sup>H NMR (500 MHz, CDCl<sub>3</sub>) δ: 7.84 (d, *J* = 9.0 Hz, 2H), 7.00 (d, *J* = 9.0 Hz, 2H), 6.28-6.17 (m, 2H), 3.88 (s, 3H), 2.68-2.63 (m, 2H), 1.41-1.33 (m, 4H), 0.90 (t, *J* = 7.5 Hz, 3H); <sup>13</sup>C NMR (126 MHz, CDCl<sub>3</sub>) δ: 163.4, 146.4, 133.5, 130.8, 129.5, 114.4, 55.7, 30.8, 27.4, 22.3, 13.8; HRMS *m/z* (ESI) calcd for C<sub>13</sub>H<sub>19</sub>O<sub>3</sub>S ([M+H]<sup>+</sup>) 255.1049, found: 255.1045.

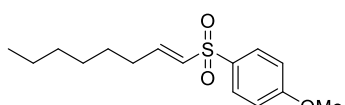

**(E)-1-Methoxy-4-(oct-1-en-1-ylsulfonyl)benzene (4v).** The product was purified by silica gel column chromatography with petroleum ether/ethyl acetate (8:1, v/v). Yellow oil (28.8 mg, 51% yield); <sup>1</sup>H NMR (500 MHz, CDCl<sub>3</sub>) δ: 7.84 (d, *J* = 8.5 Hz, 1H), 7.64 (d, *J* = 8.0 Hz, 1H), 7.48 (d, *J* = 8.5 Hz, 1H), 7.00 (d, *J* = 8.5 Hz, 1H), 6.27 (d, *J* = 11.0 Hz, 1H), 6.22-6.18 (m, 1H), 3.88 (s, 3H), 2.64 (t, *J* = 7.5 Hz, 1H), 2.22 (t, *J* = 7.0 Hz, 1H), 1.31-1.25 (m, 4H), 0.88 (t, *J* = 6.0 Hz, 3H); <sup>13</sup>C NMR (126 MHz, CDCl<sub>3</sub>) δ: 163.4, 146.5, 132.5, 129.5, 126.0, 114.4, 55.6, 32.1, 31.5, 28.7, 27.7, 22.5, 14.0; HRMS *m/z* (ESI) calcd for C<sub>15</sub>H<sub>23</sub>O<sub>3</sub>S ([M+H]<sup>+</sup>) 283.1362, found: 283.1364.

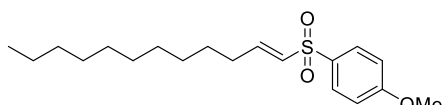

**(E)-1-(Dodec-1-en-1-ylsulfonyl)-4-methoxybenzene (4w).** The product was purified by silica gel column chromatography with petroleum ether/ethyl acetate (8:1, v/v). Yellow oil (33.8 mg, 50% yield); <sup>1</sup>H NMR (400 MHz, CDCl<sub>3</sub>) δ: 7.84 (d, *J* = 8.8 Hz, 2H), 6.99 (d, *J* = 8.8 Hz, 2H), 6.30-6.15 (m, 2H), 3.87 (s, 3H), 2.67-2.61 (m, 2H), 1.29-1.22 (m, 16H), 0.88 (t, *J* = 6.8 Hz, 3H); <sup>13</sup>C NMR (101 MHz, CDCl<sub>3</sub>) δ: 163.4, 146.5, 133.5, 130.8, 129.4, 114.3, 55.6, 31.9, 29.7, 29.5 (2), 29.3 (2), 28.7, 27.7, 22.7, 14.1; HRMS *m/z* (ESI) calcd for C<sub>19</sub>H<sub>31</sub>O<sub>3</sub>S ([M+H]<sup>+</sup>) 339.1988, found: 339.1984.

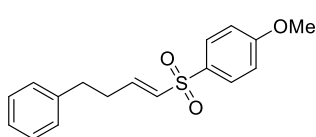

**(E)-1-Methoxy-4-((4-phenylbut-1-en-1-yl)sulfonyl)benzene (4x).**<sup>[7]</sup> The product was purified by silica gel column chromatography with petroleum ether/ethyl acetate (5:1, v/v). Colorless oil (39.3 mg, 65% yield); <sup>1</sup>H NMR (500 MHz, CDCl<sub>3</sub>) δ: 7.76-7.73 (m, 2H), 7.30-7.27 (m, 2H), 7.22-7.17 (m, 3H), 6.97-6.94 (m, 2H), 6.29-6.17 (m, 2H), 3.87 (s, 3H), 3.04-2.99 (m, 2H), 2.76 (t, *J* = 7.5 Hz, 2H); <sup>13</sup>C NMR (126 MHz, CDCl<sub>3</sub>) δ: 163.4,

144.8, 140.3, 133.2, 131.3, 129.5, 128.5 (2), 126.2, 114.4, 55.6, 34.8, 29.7.

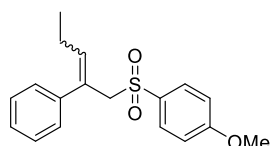

**1-Methoxy-4-((2-phenylpent-2-en-1-yl)sulfonyl)benzene (7a).** The product was purified by silica gel column chromatography with petroleum ether/ethyl acetate (6:1, v/v). Yellow oil (49.9 mg, 79% yield, 1.5:1); <sup>1</sup>H NMR (500 MHz, CDCl<sub>3</sub>) δ: 7.68-7.62 (m, 2H), 7.24-7.15 (m, 4H), 7.04 (d, *J* = 7.0 Hz, 1H), 6.88 (d, *J* = 8.5 Hz, 0.8H), 6.81 (d, *J* = 9.0 Hz, 1.2H), 5.95 (t, *J* = 7.5 Hz, 0.6H), 5.60 (t, *J* = 7.5 Hz, 0.4H), 4.33 (s, 1.2H), 4.09 (s, 0.8H), 3.83 (s, 1.2H), 3.80 (s, 1.8H), 2.12-2.08 (m, 1.2H), 2.03-1.97 (m, 0.8H), 0.98 (t, *J* = 7.5 Hz, 1.8H), 0.88 (t, *J* = 7.5 Hz, 1.2H); <sup>13</sup>C NMR (126 MHz, CDCl<sub>3</sub>) δ: 163.5, 163.4, 140.8, 140.0 (2), 138.4, 130.6, 130.5, 128.4, 128.1, 128.0, 127.7, 127.5, 127.0, 126.9, 126.3, 114.0, 113.9, 65.2, 57.7, 55.6, 55.5, 22.7, 22.6, 13.9, 13.5; HRMS *m/z* (ESI) calcd for C<sub>18</sub>H<sub>21</sub>O<sub>3</sub>S ([M+H]<sup>+</sup>) 317.1206, found: 317.1202.

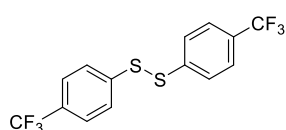

**1,2-Bis(4-(trifluoromethyl)phenyl)disulfane (8a).**<sup>[81]</sup> The product was purified by silica gel column chromatography with petroleum ether/ethyl acetate (30:1, v/v). Yellow solid (58.1 mg, 82% yield); <sup>1</sup>H NMR (500 MHz, CDCl<sub>3</sub>) δ: 7.58-7.54 (m, 8H); <sup>13</sup>C NMR (126 MHz, CDCl<sub>3</sub>) δ: 140.8 (q, *J* = 1.3 Hz), 129.4 (q, *J* = 32.9 Hz), 126.6, 126.1 (q, *J* = 3.8 Hz), 123.9 (q, *J* = 272.4 Hz); <sup>19</sup>F NMR (471 MHz, CDCl<sub>3</sub>) δ: -62.6.

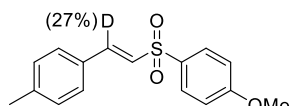

**(*E*)-1-Methoxy-4-((2-(*p*-tolyl)vinyl-2-d)sulfonyl)benzene (4a-D).** The product was purified by silica gel column chromatography with petroleum ether/ethyl acetate (3:1, v/v). White solid (48.6 mg, 84% yield); <sup>1</sup>H NMR (500 MHz, CDCl<sub>3</sub>) δ: 7.86 (d, *J* = 9.0 Hz, 2H), 7.59 (d, *J* = 15.5 Hz, 0.73H), 7.36 (d, *J* = 8.0 Hz, 2H), 7.18 (d, *J* = 8.0 Hz, 2H), 7.00 (d, *J* = 9.5 Hz, 2H), 6.80 (d, *J* = 15.5 Hz, 1H), 3.86 (s, 3H), 2.36 (s, 3H); <sup>13</sup>C NMR (126 MHz, CDCl<sub>3</sub>) δ: 163.4, 141.5, 141.4, 132.4, 129.7, 129.7, 128.4, 126.7, 114.5, 55.6, 21.4.

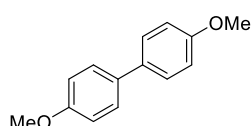

**4,4'-Dimethoxybiphenyl (9a).**<sup>[91]</sup> The product was purified by silica gel column chromatography with petroleum ether/ethyl acetate (40:1, v/v). White solid; <sup>1</sup>H NMR (500 MHz, CDCl<sub>3</sub>) δ: 7.46 (d, *J* = 9.0 Hz, 4H), 6.94 (d, *J* = 9.0 Hz, 4H), 3.82 (s, 6H); <sup>13</sup>C NMR (126 MHz, CDCl<sub>3</sub>) δ: 158.7, 133.4, 127.7, 114.1, 55.3.

## (E) References

- [1] P. Das, S. Das and R. J. Jana, *Chem. Asian J.*, 2022, **17**, e202200085.
- [2] G. W. Rong, J. C. Mao, H. Yan, Y. Zheng and G. Q. Zhang, *J. Org. Chem.*, 2015, **80**, 4697-4703.
- [3] S. Tang, Y. Wu, W. Q. Liao, R. P. Bai, C. Liu and A. W. Lei, *Chem. Commun.*, 2014, **50**, 4496-4499.
- [4] R. Singh, B. K. Allam, N. Singh, K. Kumari, S. K. Singh and K. N. Singh, *Org. Lett.*, 2015, **17**, 2656-2659.
- [5] T. Keshari, R. Kapoor and L. D. S. Yadav, *Eur. J. Org. Chem.*, 2016, **15**, 2695-2699.
- [6] S. Y. Woo, J. H. Kim, M. K. Moon, S. H. Han, S. K. Yeon, J. W. Choi, B. K. Jang, H. J. Song, Y. G. Kang, J. W. Kim, J. Lee, D. J. Kim, O. Hwang and K. D. Park, *J. Med. Chem.*, 2014, **57**, 1473-1487.
- [7] D. Y. Hu, Y. Zhang, J. W. Li, K. J. Liang and C. F. Xia, *Chem. Commun.*, 2023, **59**, 462-465.
- [8] P. Boehm, P. Müller, P. Finkelstein, M. A. Rivero-Crespo, M.-O. Ebert, N. Trapp and B. Morandi, *J. Am. Chem. Soc.*, 2022, **144**, 13096-13108.
- [9] X. C. Gong, J. Wu, Y. G. Meng, Y. L. Zhang, L.-W. Ye and C. Y. Zhu, *Green Chem.*, 2019, **21**, 995-999.

**(F) Spectra**

**(E)-1-Methoxy-4-((4-methylstyryl)sulfonyl)benzene (4a)**

**<sup>1</sup>H NMR-spectrum (400 MHz, CDCl<sub>3</sub>) of 4a**

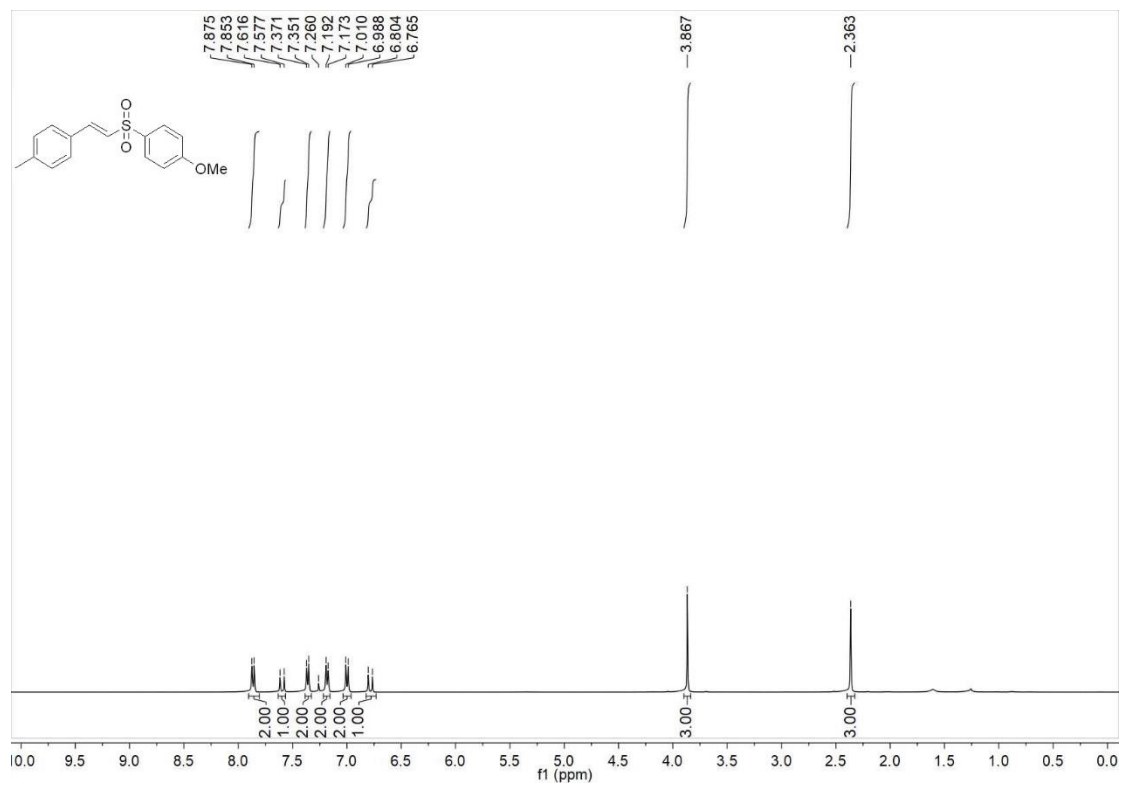

**<sup>13</sup>C NMR-spectrum (101 MHz, CDCl<sub>3</sub>) of 4a**

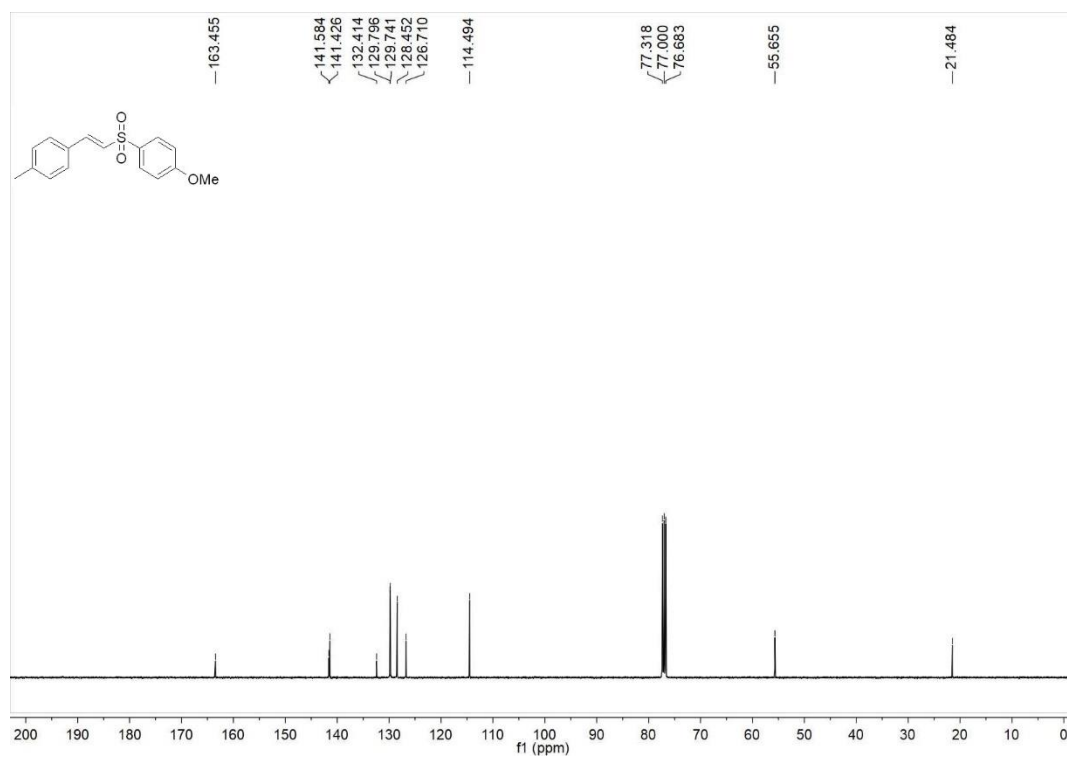

**(E)-1-Methyl-4-((4-methylstyryl)sulfonyl)benzene (4b)**

**<sup>1</sup>H NMR-spectrum (400 MHz, CDCl<sub>3</sub>) of 4b**

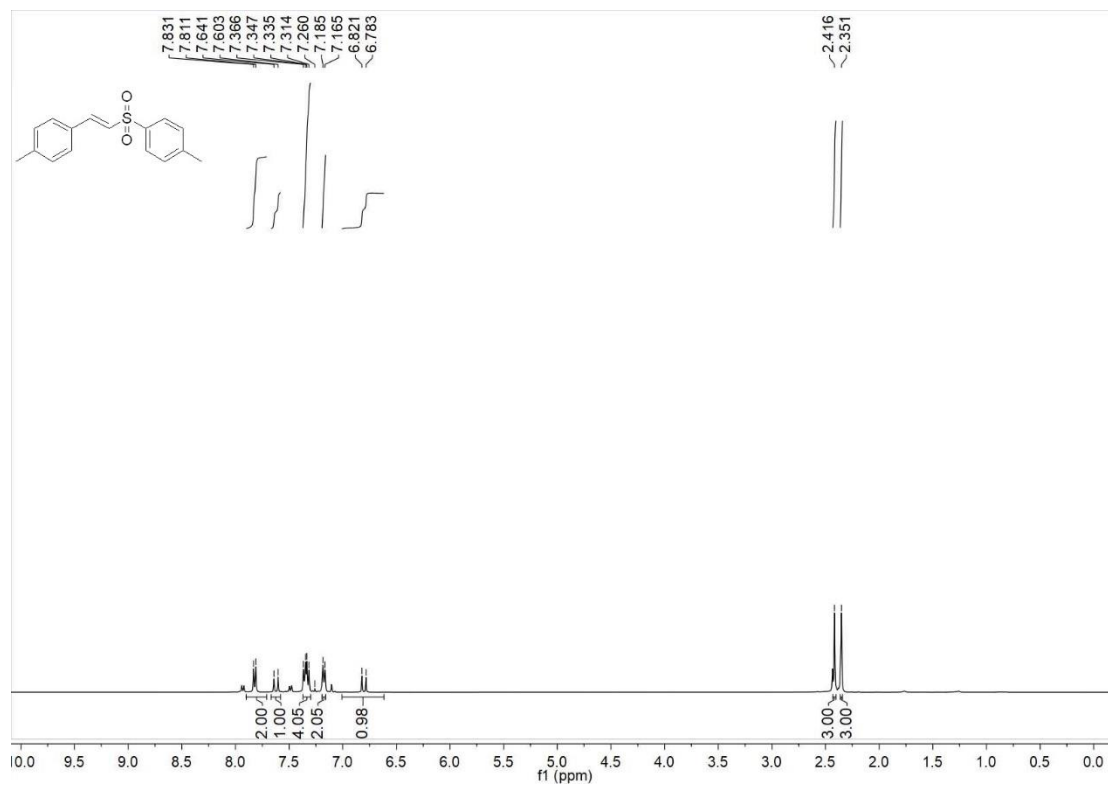

**<sup>13</sup>C NMR-spectrum (101 MHz, CDCl<sub>3</sub>) of 4b**

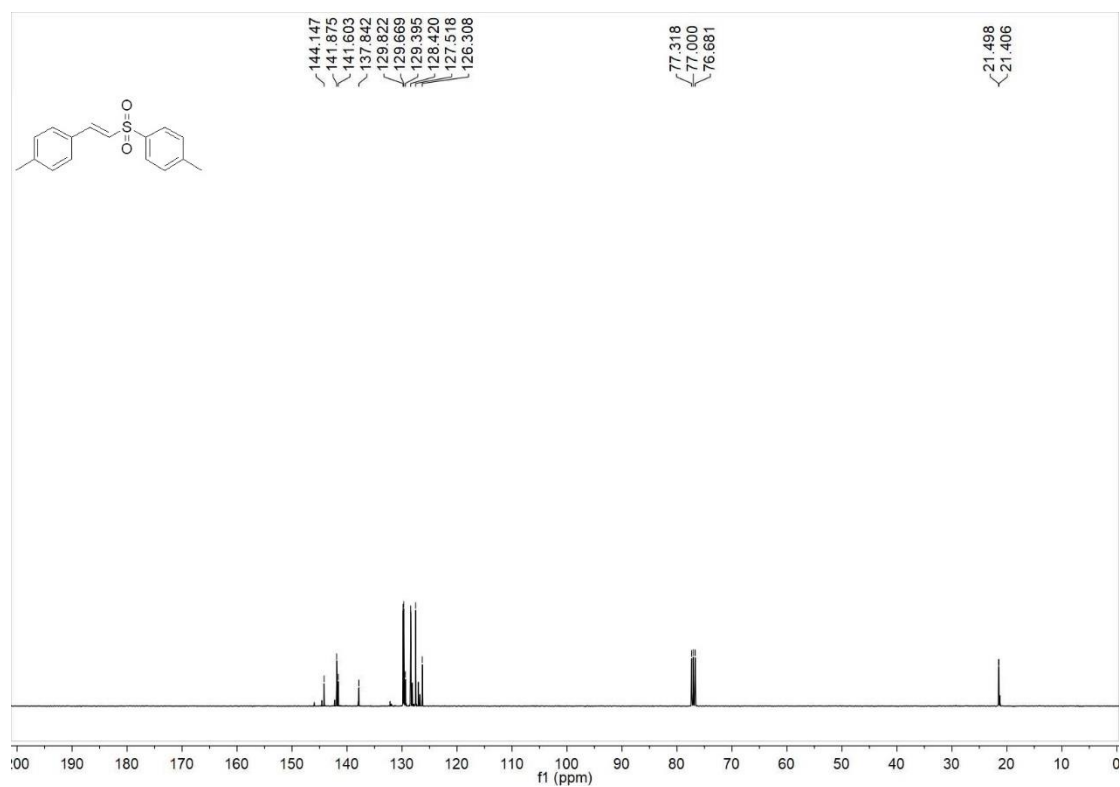

**(E)-1-Bromo-4-((4-methylstyryl)sulfonyl)benzene (4c)**

**<sup>1</sup>H NMR-spectrum (400 MHz, CDCl<sub>3</sub>) of 4c**

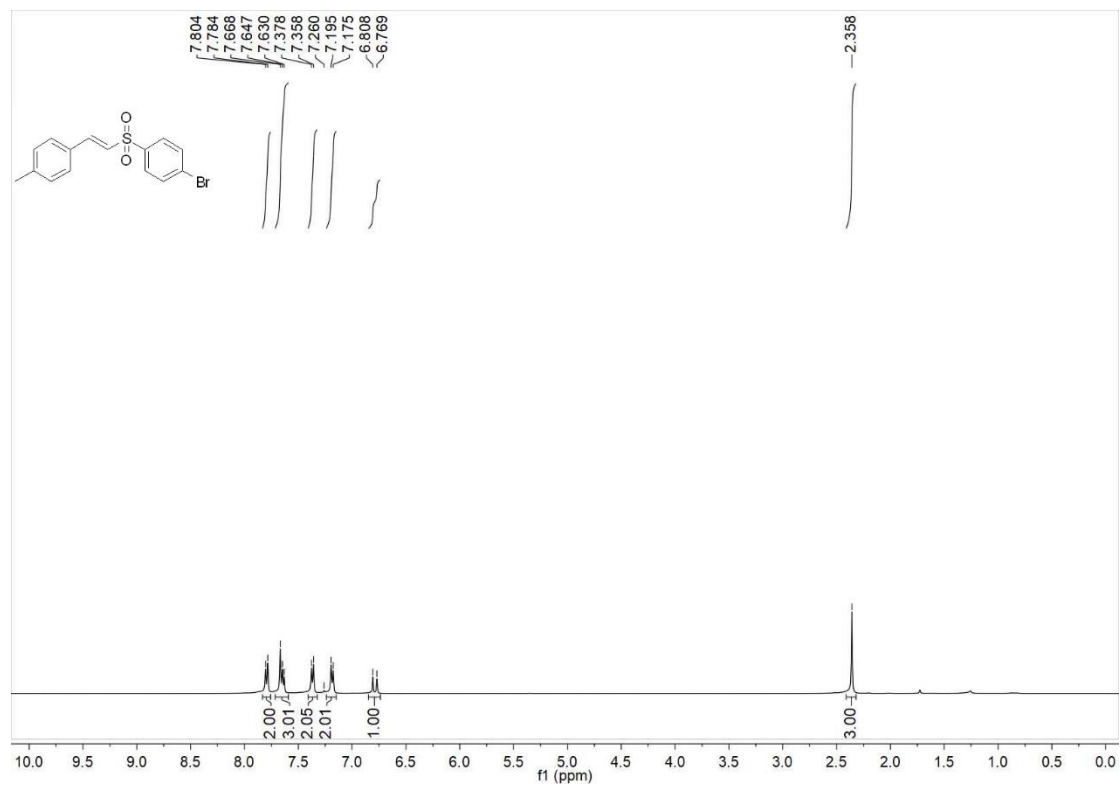

**<sup>13</sup>C NMR-spectrum (101 MHz, CDCl<sub>3</sub>) of 4c**

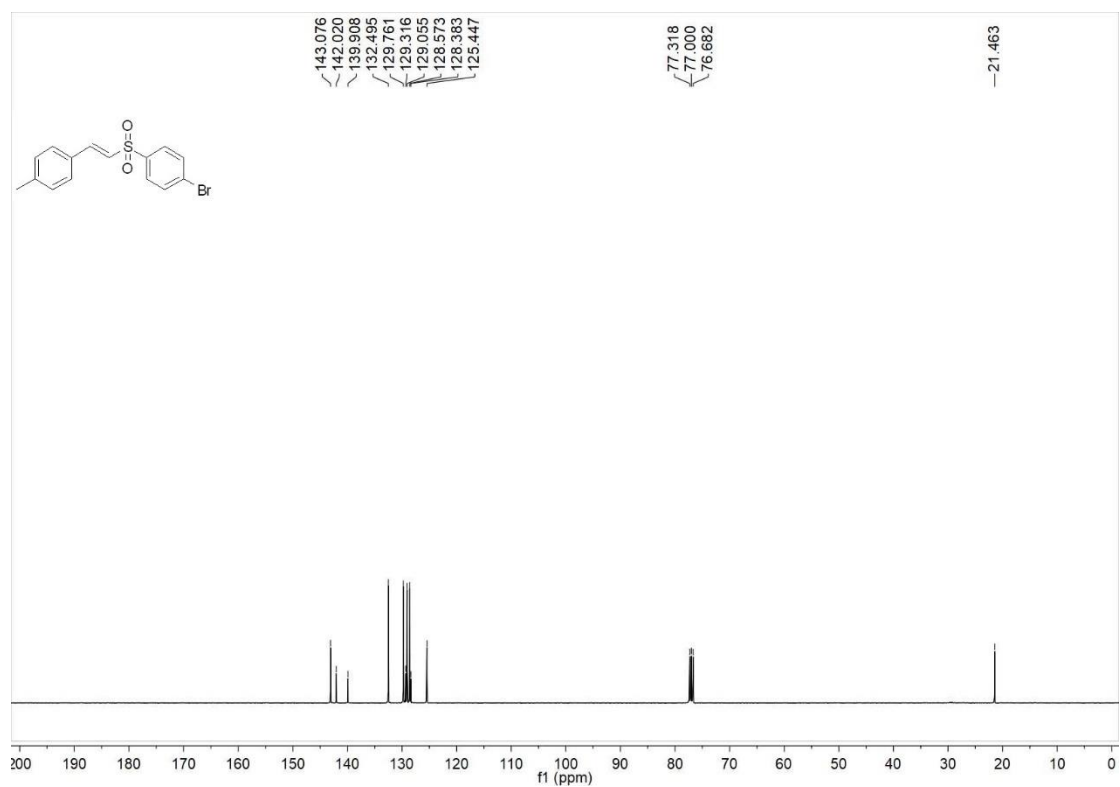



**(E)-1-Bromo-4-((4-*tert*-butyl)styryl)sulfonyl)benzene (4d)**

**<sup>1</sup>H NMR-spectrum (400 MHz, CDCl<sub>3</sub>) of 4d**

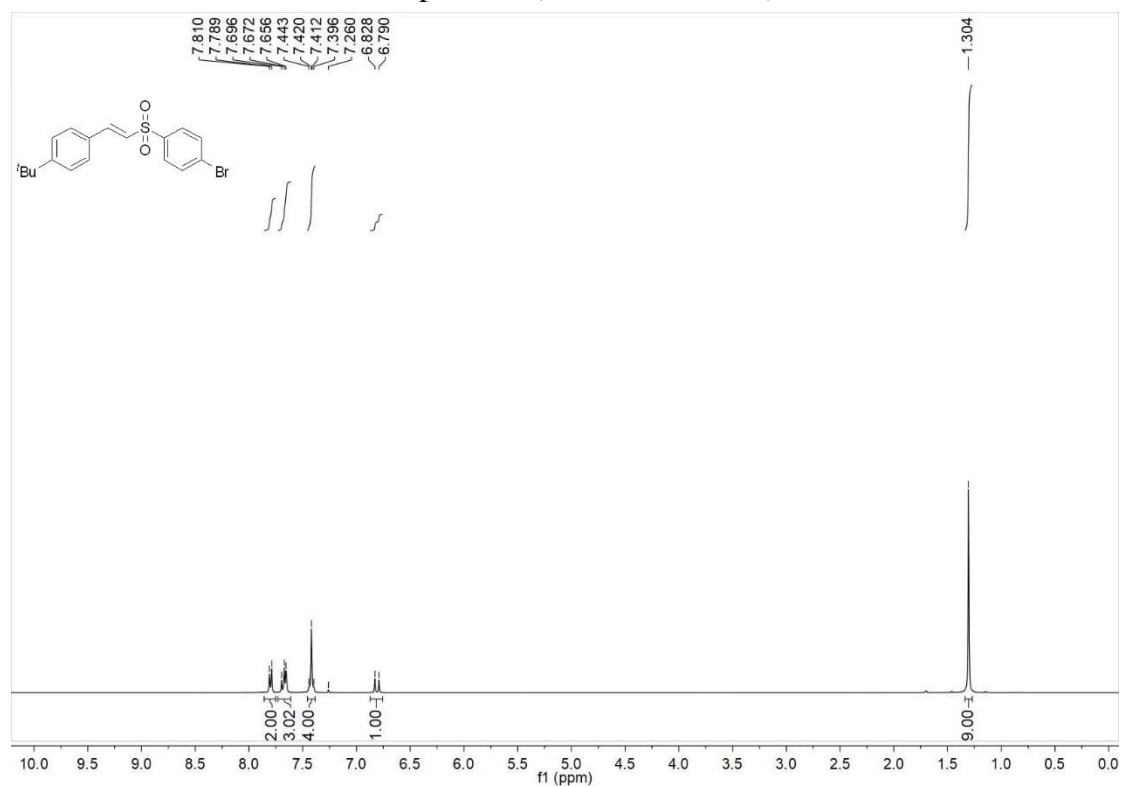

**<sup>13</sup>C NMR-spectrum (101 MHz, CDCl<sub>3</sub>) of 4d**

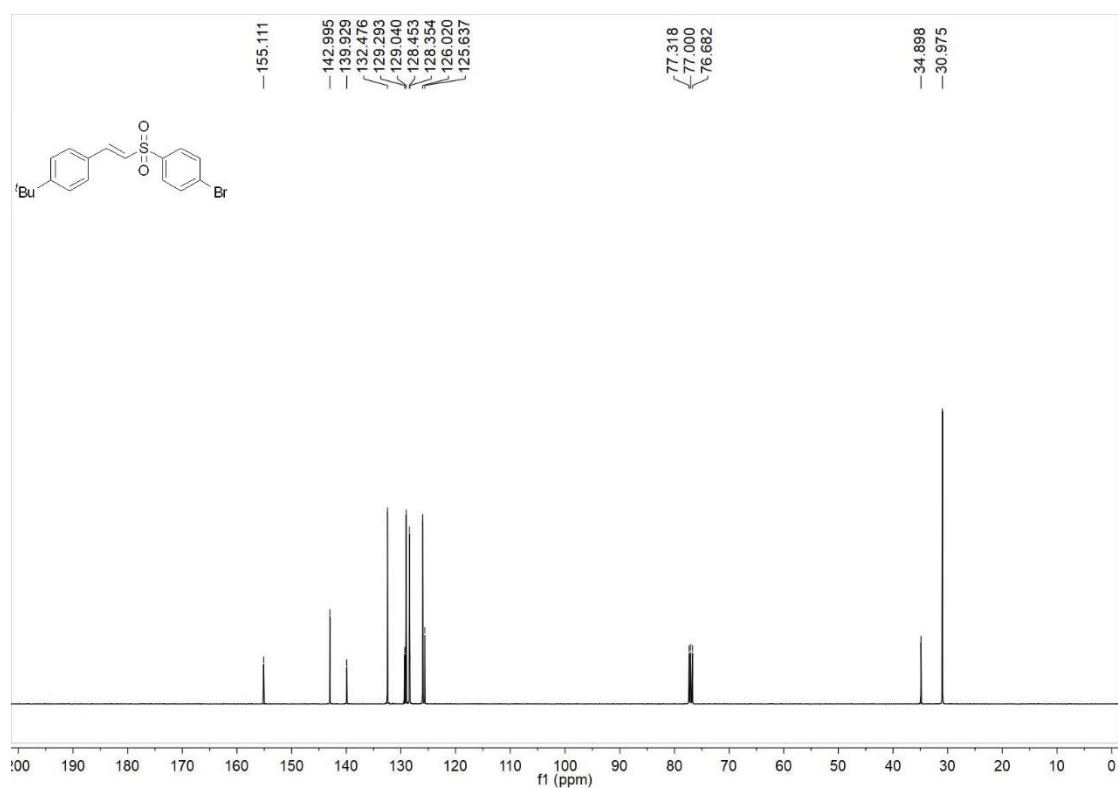

**(E)-1-Bromo-4-((4-chlorostyryl)sulfonyl)benzene (4e)**

**<sup>1</sup>H NMR-spectrum (400 MHz, CDCl<sub>3</sub>) of 4e**

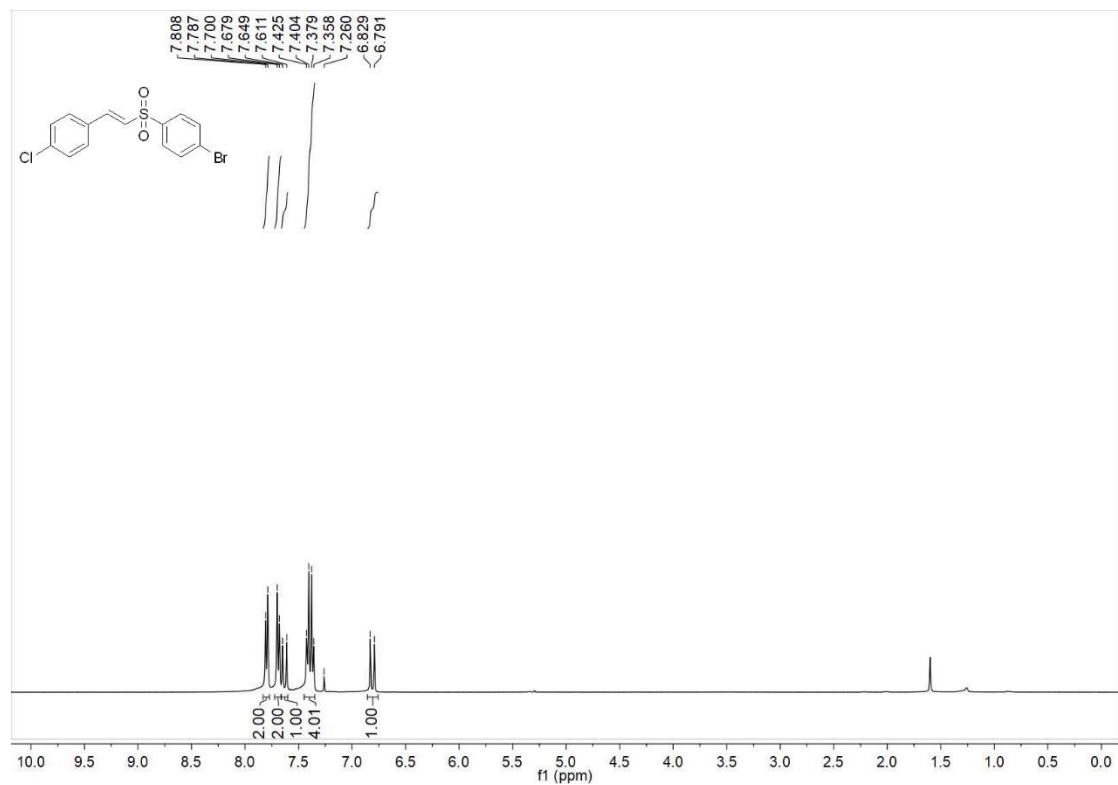

**<sup>13</sup>C NMR-spectrum (101 MHz, CDCl<sub>3</sub>) of 4e**

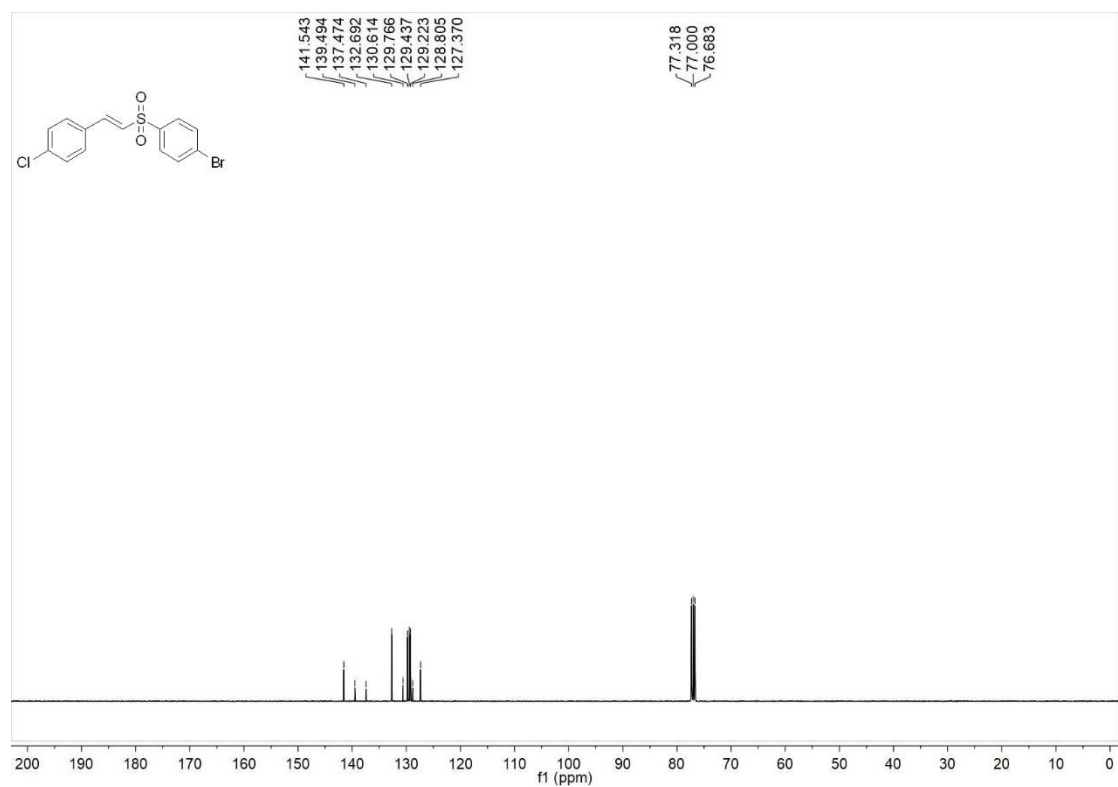

**(E)-1-(2-((4-Methoxyphenyl)sulfonyl)vinyl)-3-methylbenzene (4f)**

**<sup>1</sup>H NMR-spectrum (400 MHz, CDCl<sub>3</sub>) of 4f**

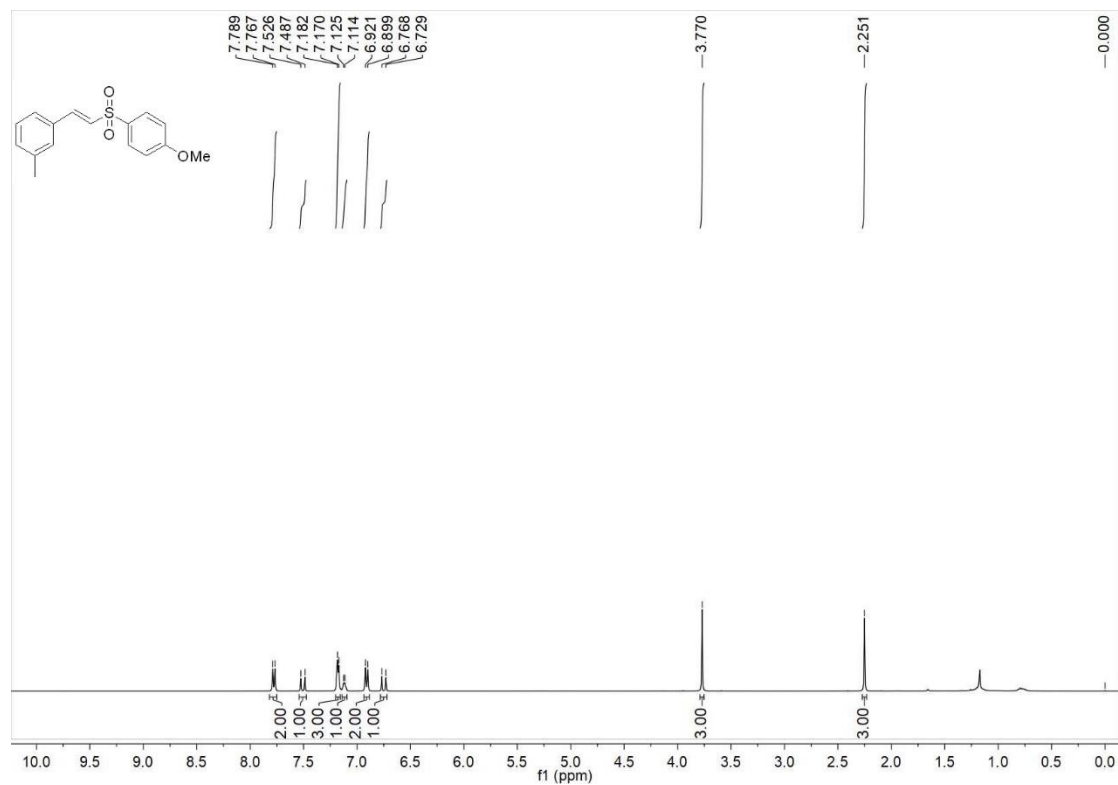

**<sup>13</sup>C NMR-spectrum (101 MHz, CDCl<sub>3</sub>) of 4f**

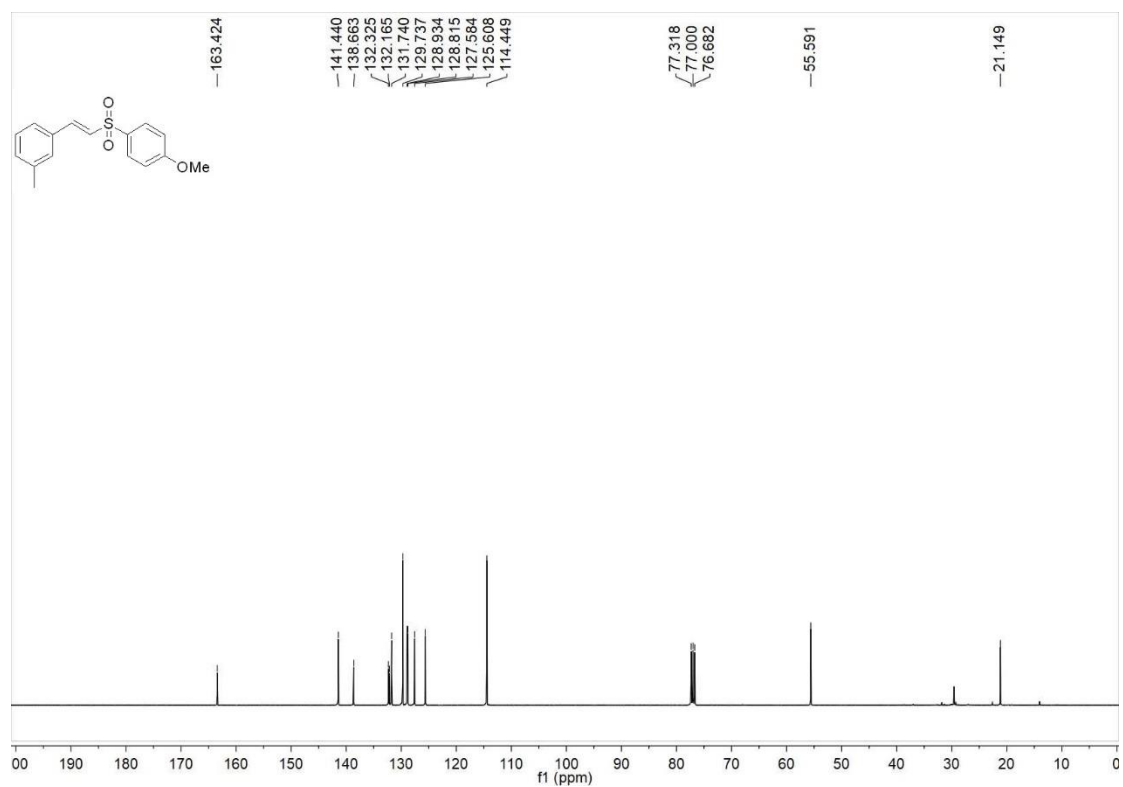

**(E)-1-(2-((4-Methoxyphenyl)sulfonyl)vinyl)-2-methylbenzene (4g)**

**<sup>1</sup>H NMR-spectrum (400 MHz, CDCl<sub>3</sub>) of 4g**

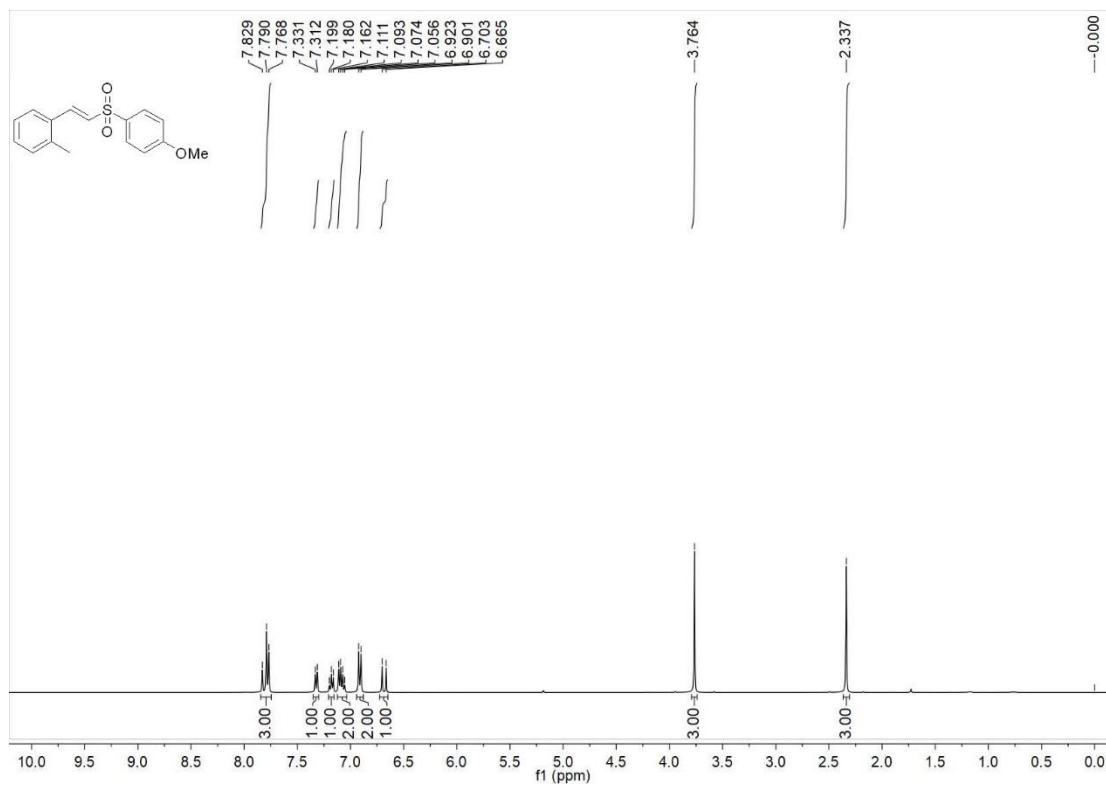

**<sup>13</sup>C NMR-spectrum (101 MHz, CDCl<sub>3</sub>) of 4g**

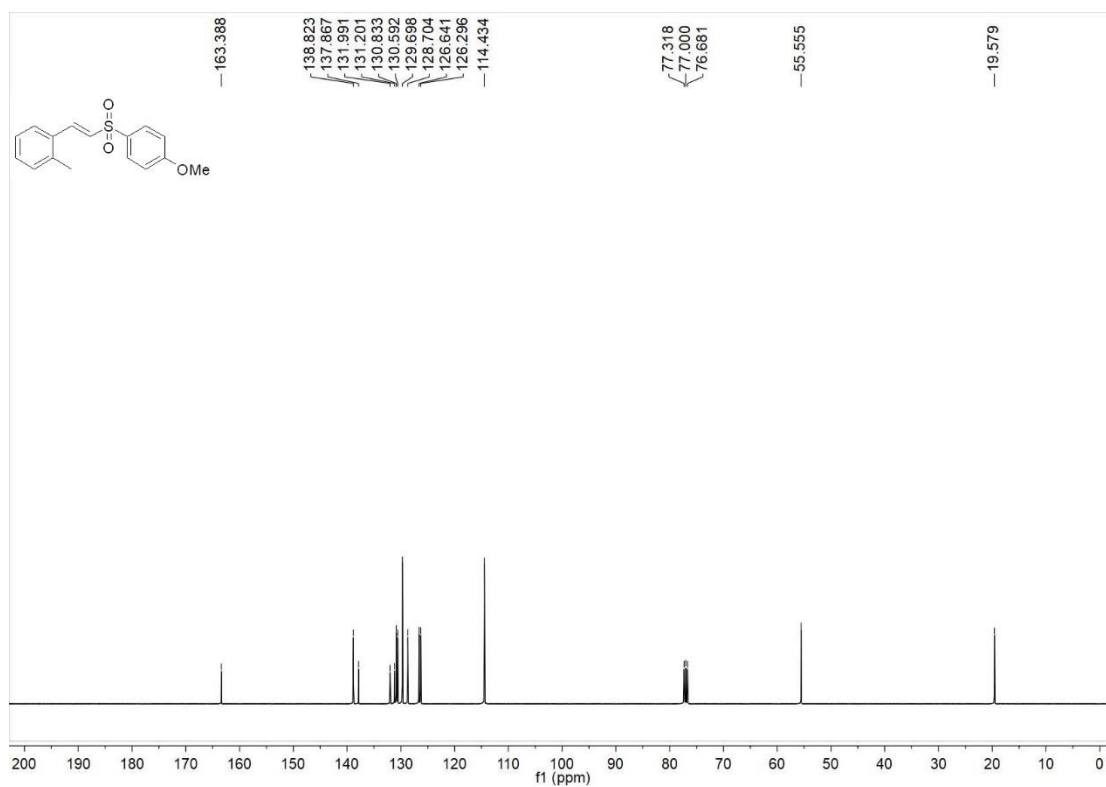

**(E)-1-Methoxy-4-(2-((4-methoxyphenyl)sulfonyl)vinyl)benzene (4h)**

**<sup>1</sup>H NMR-spectrum (400 MHz, CDCl<sub>3</sub>) of 4h**

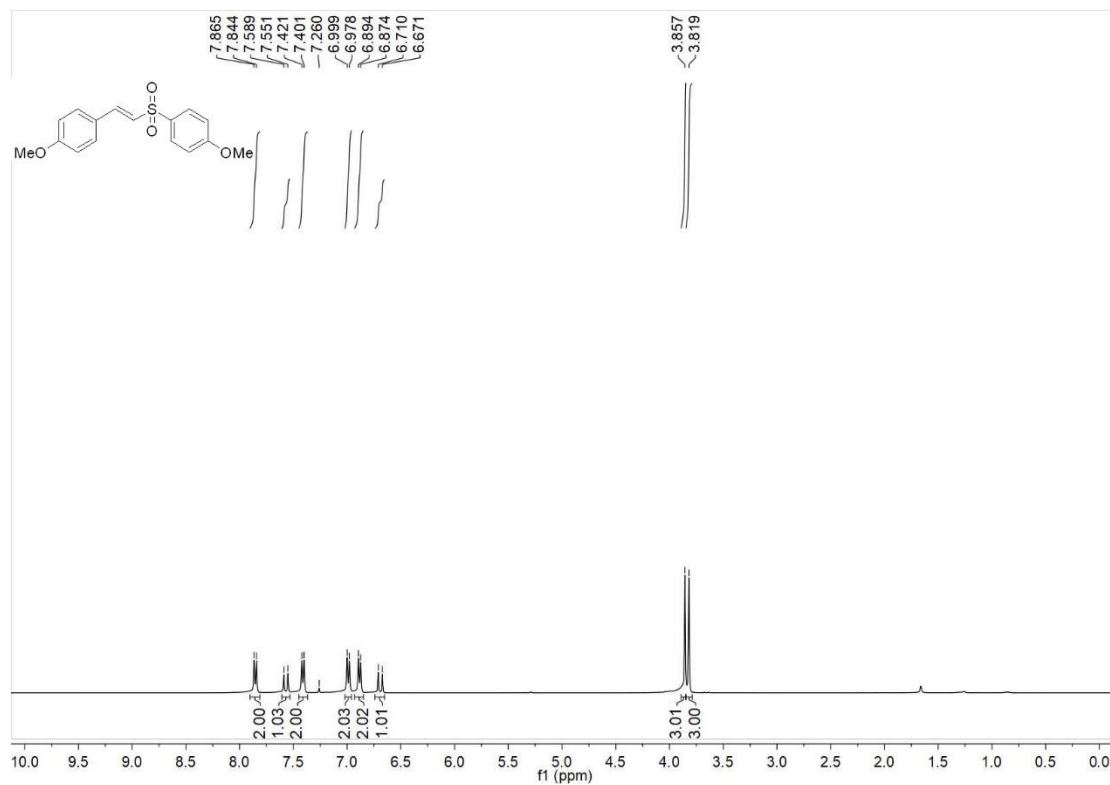

**<sup>13</sup>C NMR-spectrum (101 MHz, CDCl<sub>3</sub>) of 4h**

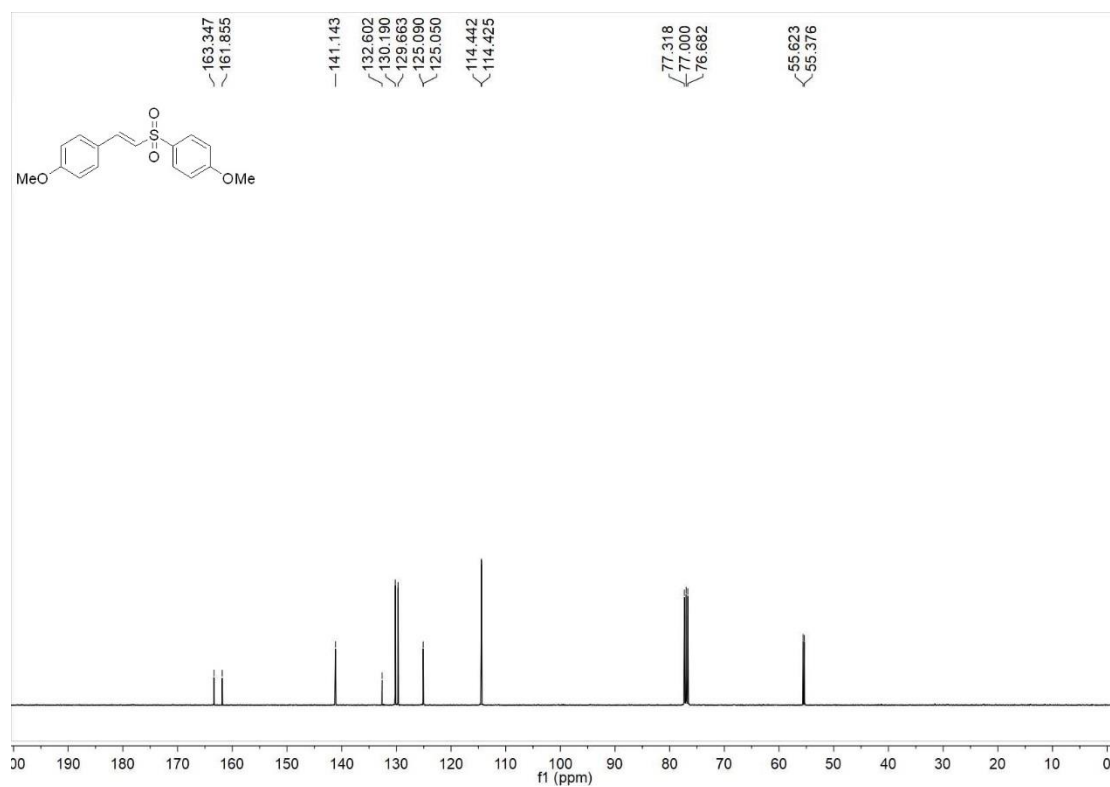

**(E)-1-Butyl-4-(2-((4-methoxyphenyl)sulfonyl)vinyl)benzene (4i)**

**<sup>1</sup>H NMR-spectrum (400 MHz, CDCl<sub>3</sub>) of 4i**

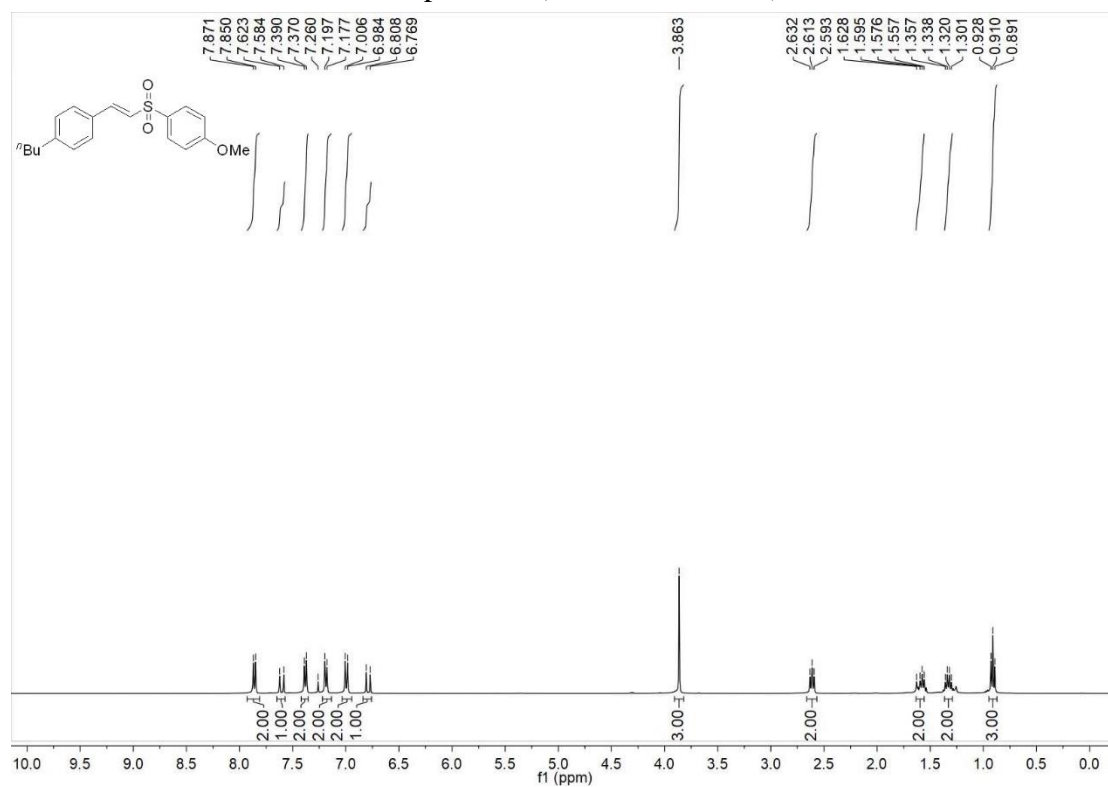

**<sup>13</sup>C NMR-spectrum (101 MHz, CDCl<sub>3</sub>) of 4i**

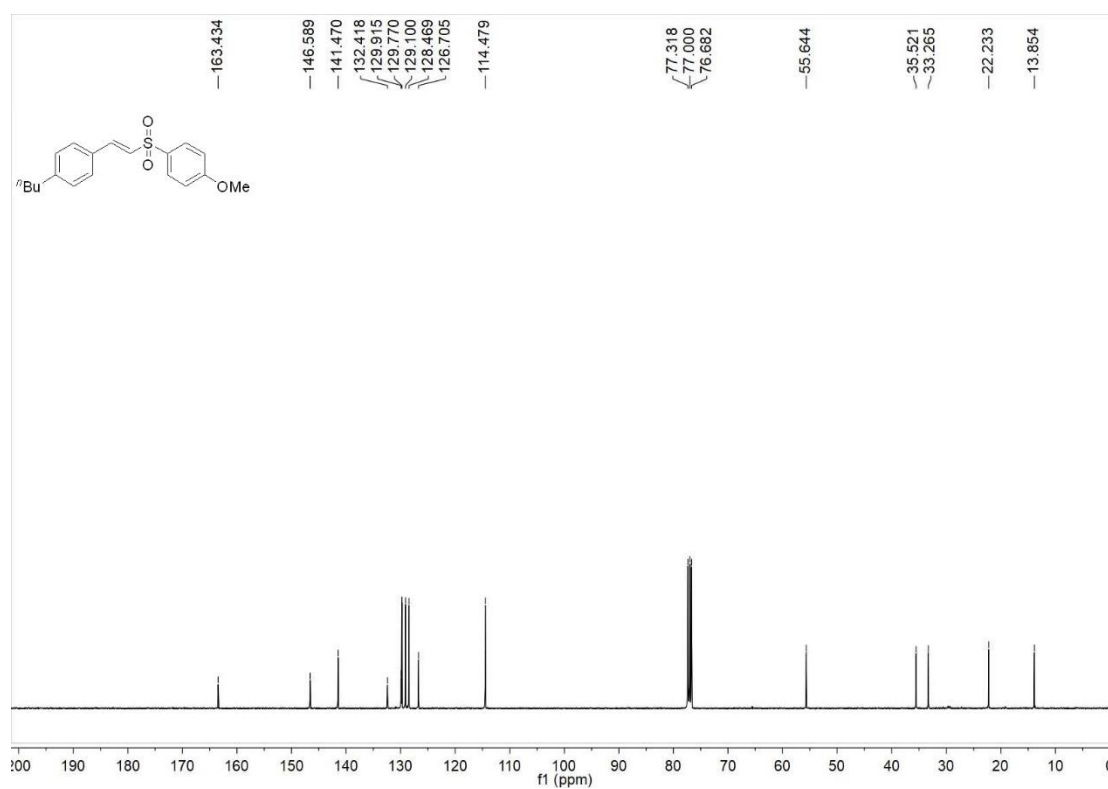

**(E)-1-(tert-Butyl)-4-(2-((4-methoxyphenyl)sulfonyl)vinyl)benzene (4j)**

**<sup>1</sup>H NMR-spectrum (400 MHz, CDCl<sub>3</sub>) of 4j**

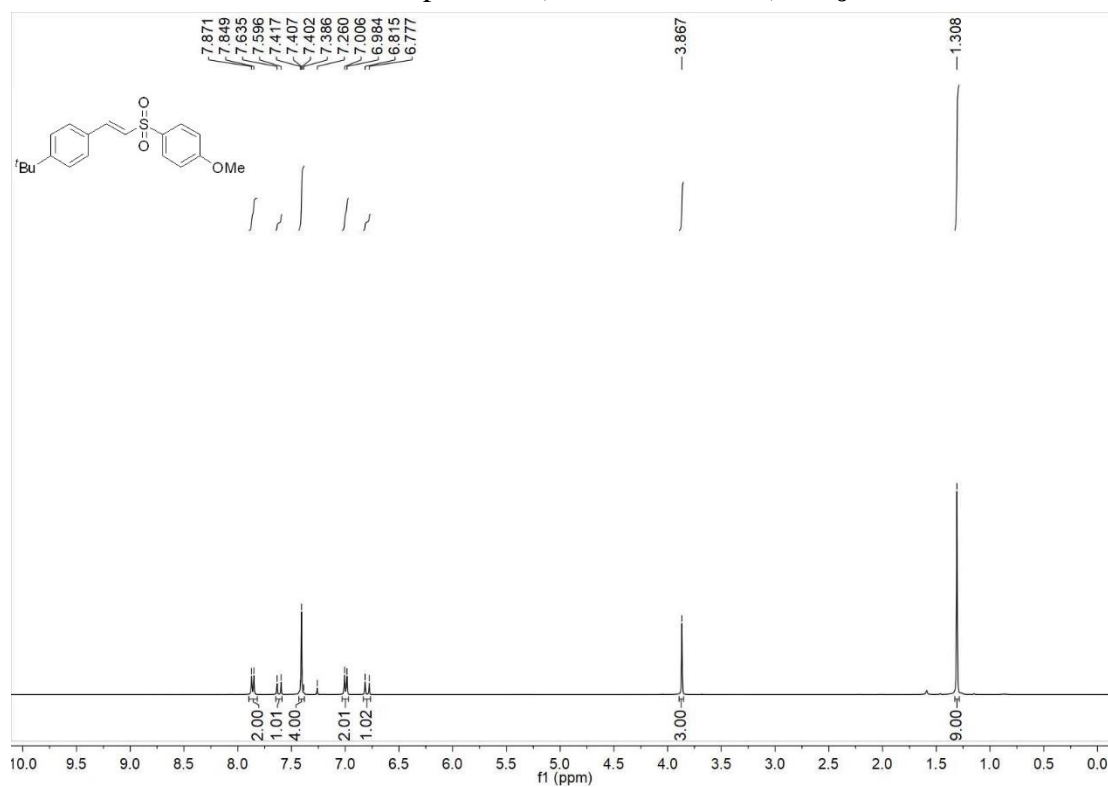

**<sup>13</sup>C NMR-spectrum (101 MHz, CDCl<sub>3</sub>) of 4j**

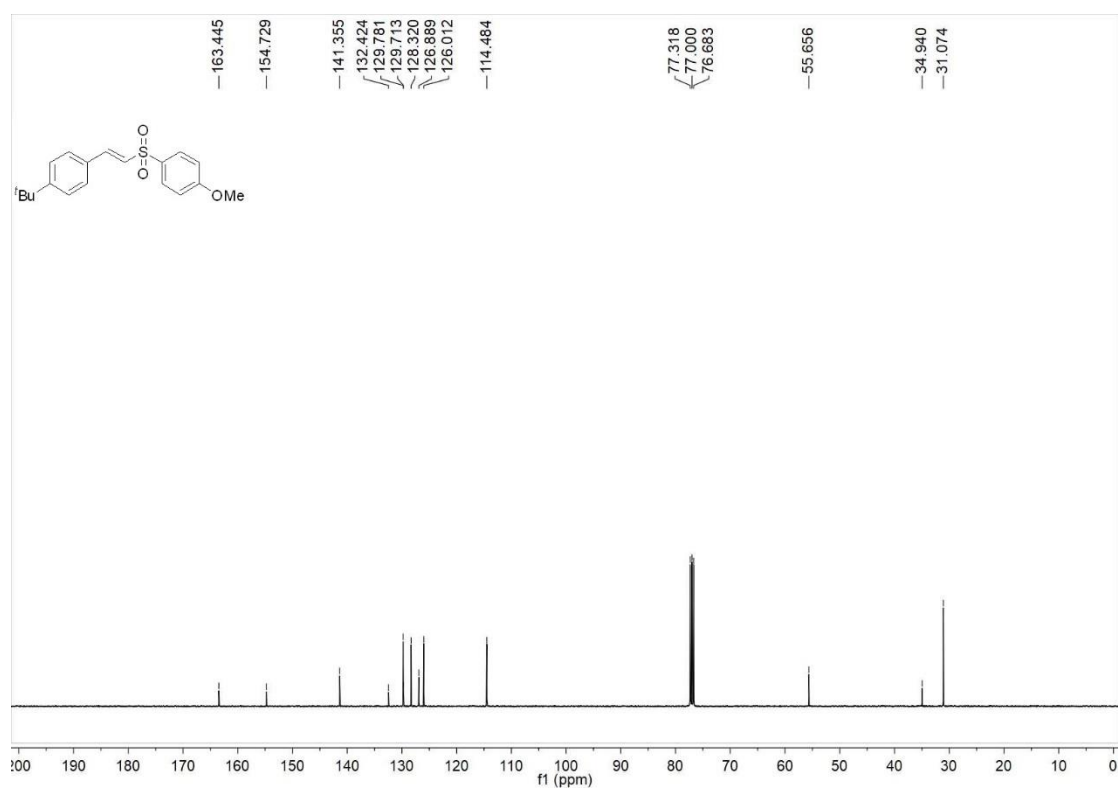

**(E)-4-(2-((4-Methoxyphenyl)sulfonyl)vinyl)-1,1'-biphenyl (4k)**

**<sup>1</sup>H NMR-spectrum (500 MHz, CDCl<sub>3</sub>) of 4k**

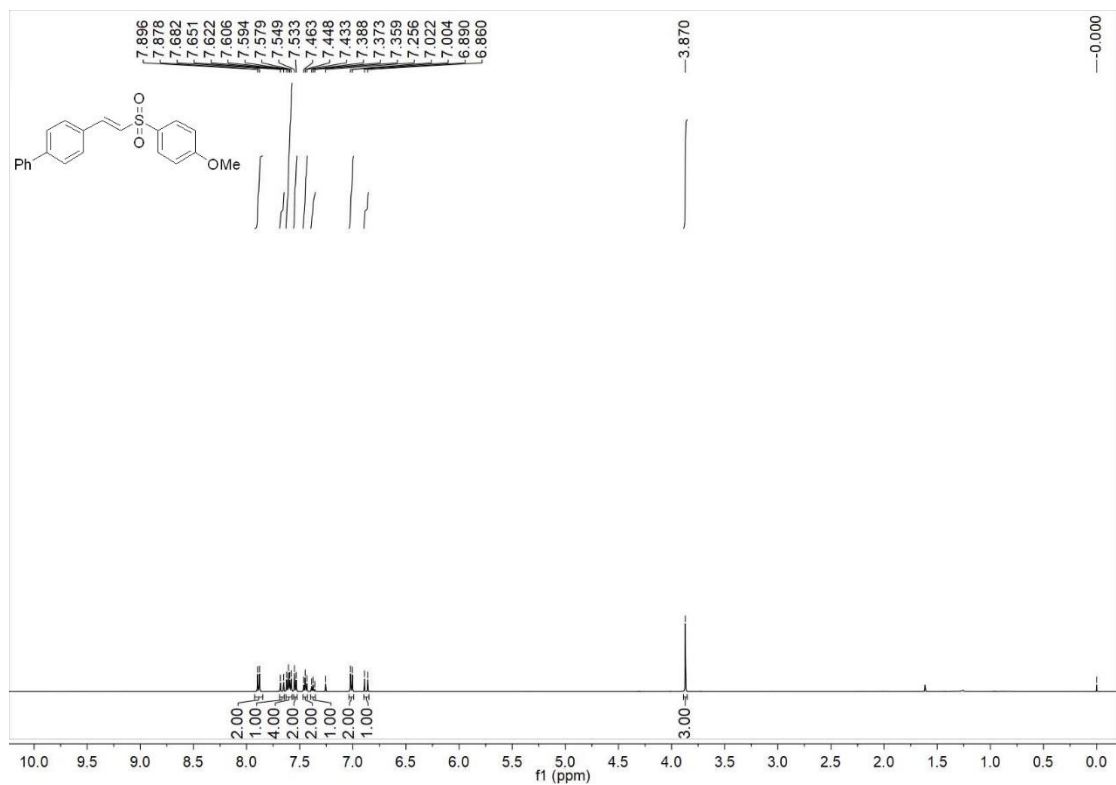

**<sup>13</sup>C NMR-spectrum (126 MHz, CDCl<sub>3</sub>) of 4k**

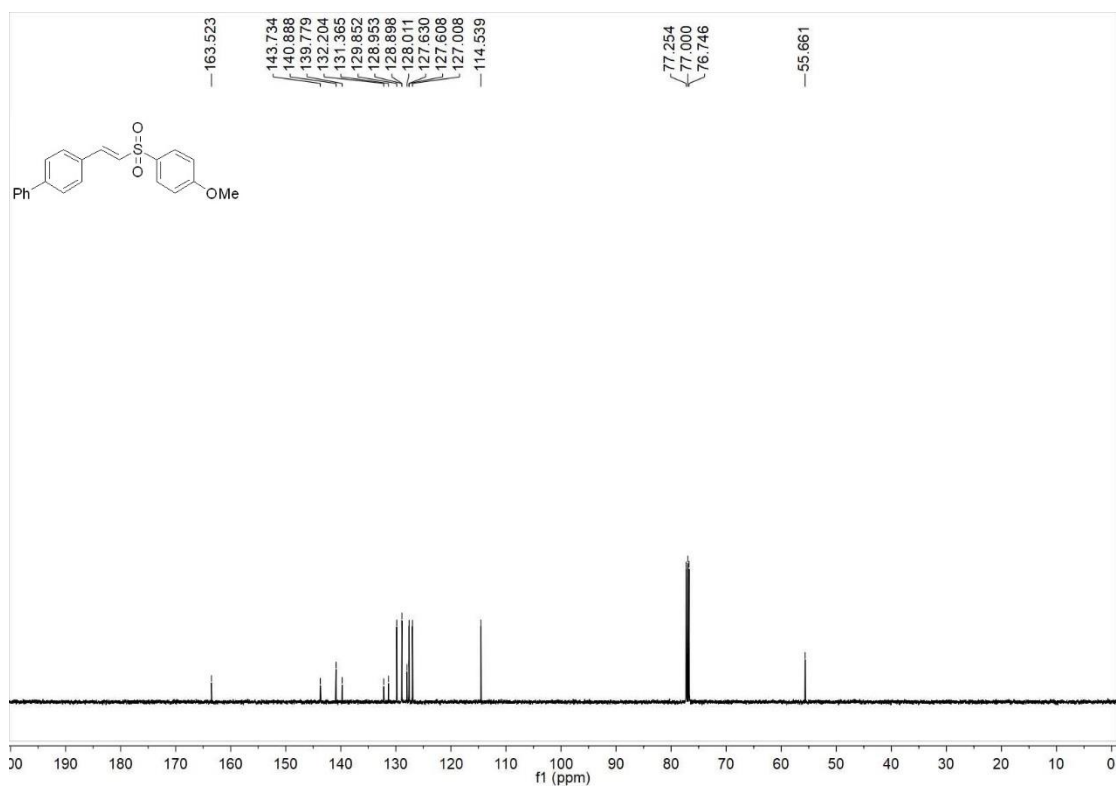



**(E)-1-Methoxy-4-(styrylsulfonyl)benzene (4I)**

**<sup>1</sup>H NMR-spectrum (400 MHz, CDCl<sub>3</sub>) of 4I**

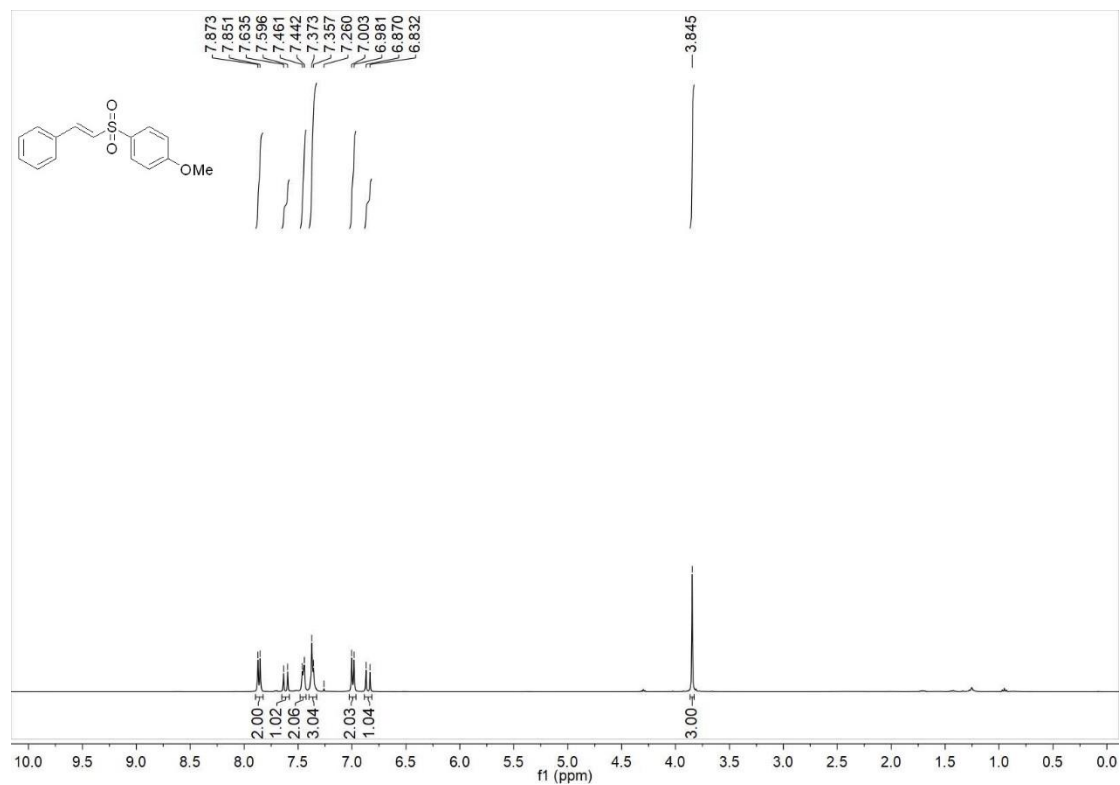

**<sup>13</sup>C NMR-spectrum (101 MHz, CDCl<sub>3</sub>) of 4I**

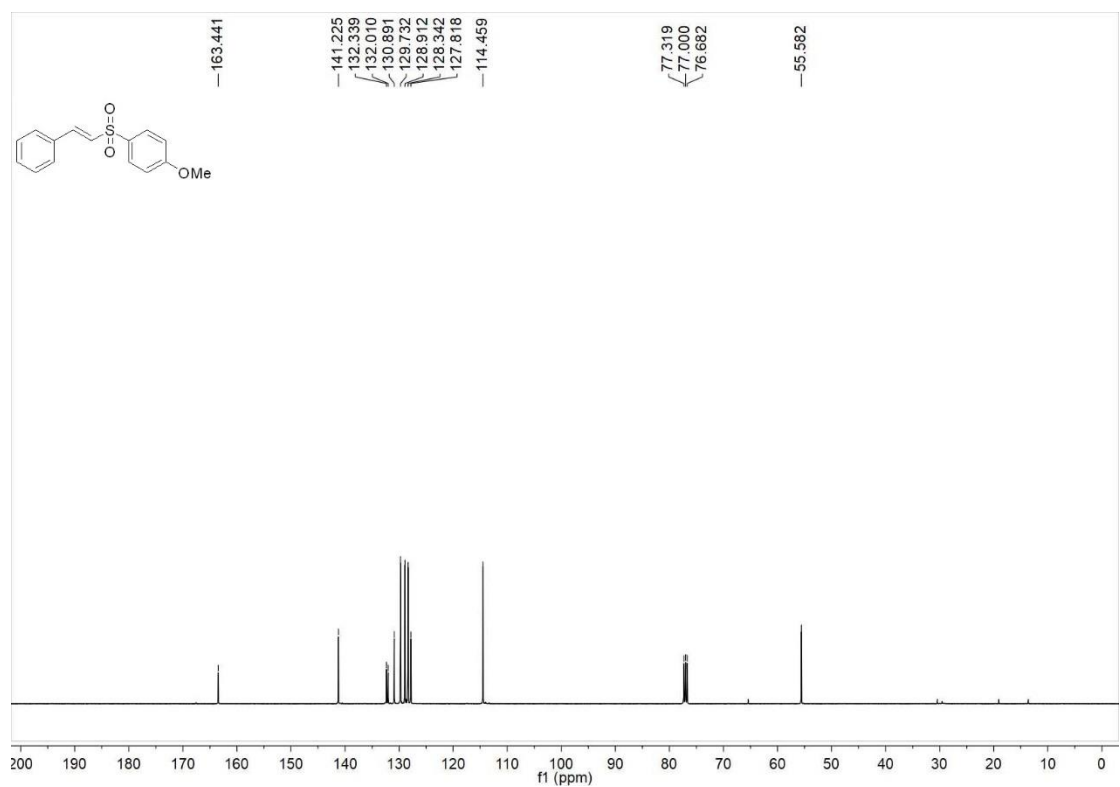

**(E)-1-Fluoro-4-(2-((4-methoxyphenyl)sulfonyl)vinyl)benzene (4m)**

**<sup>1</sup>H NMR-spectrum (400 MHz, CDCl<sub>3</sub>) of 4m**

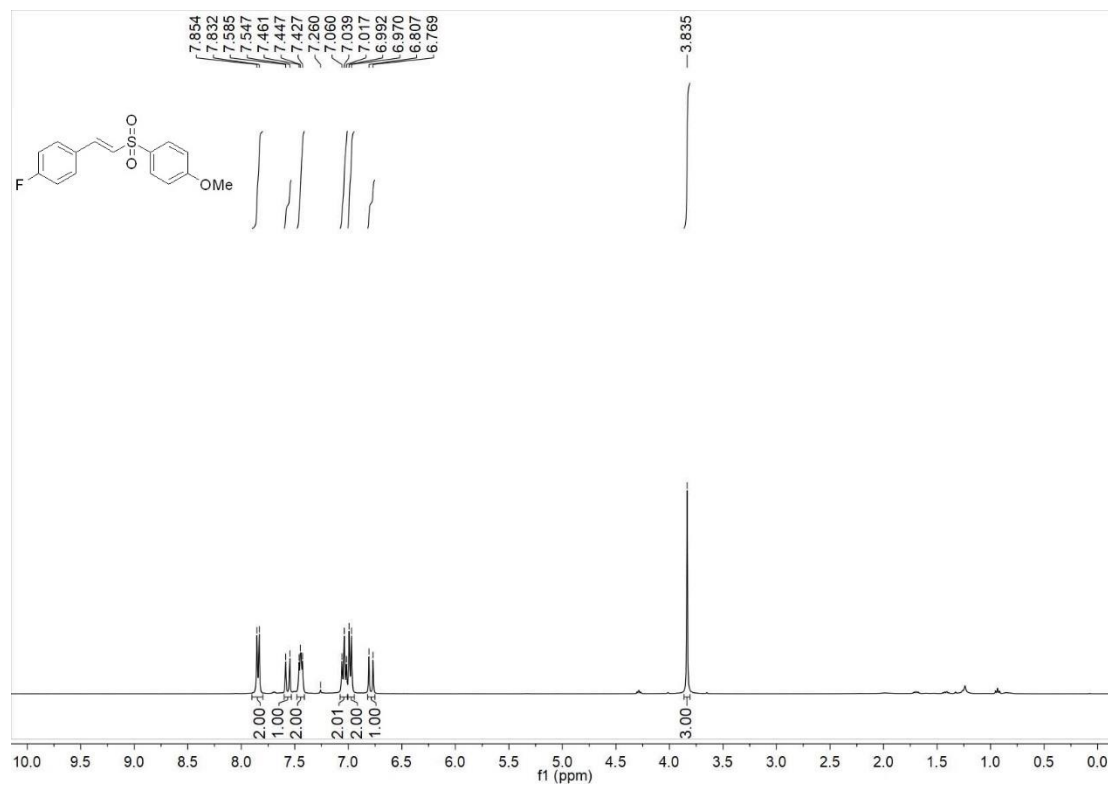

**<sup>13</sup>C NMR-spectrum (101 MHz, CDCl<sub>3</sub>) of 4m**

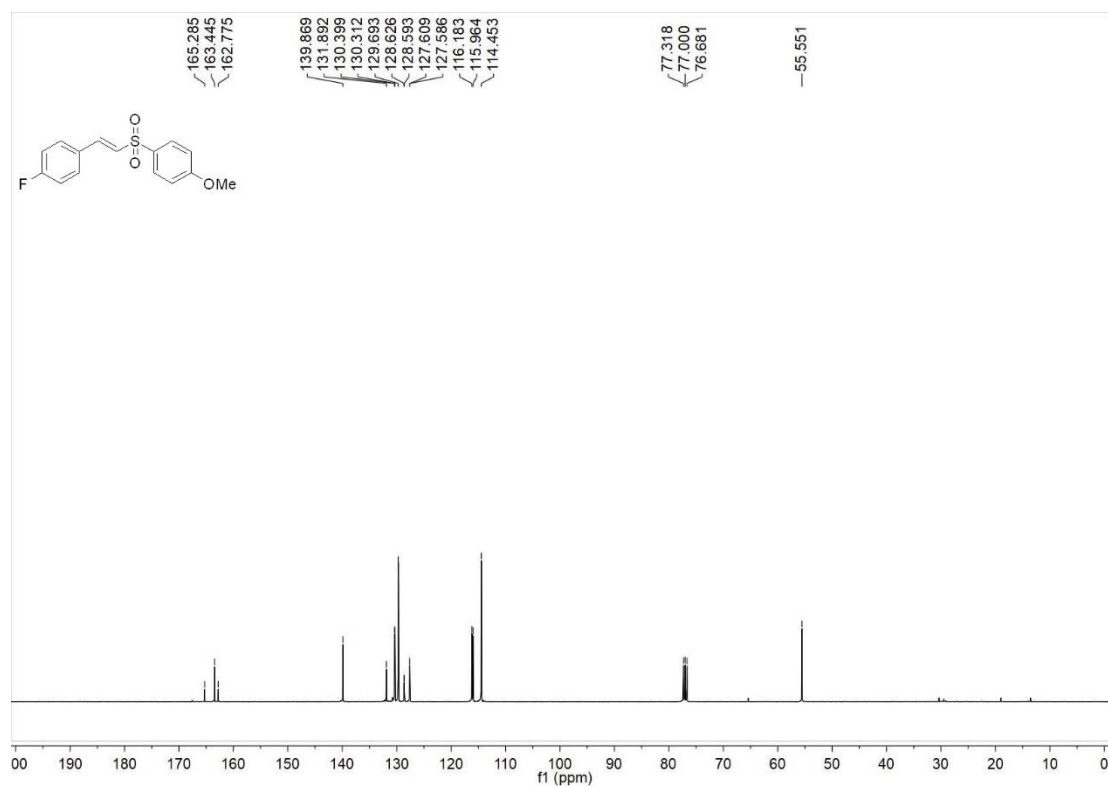

**<sup>19</sup>F NMR-spectrum (376 MHz, CDCl<sub>3</sub>) of 4m**

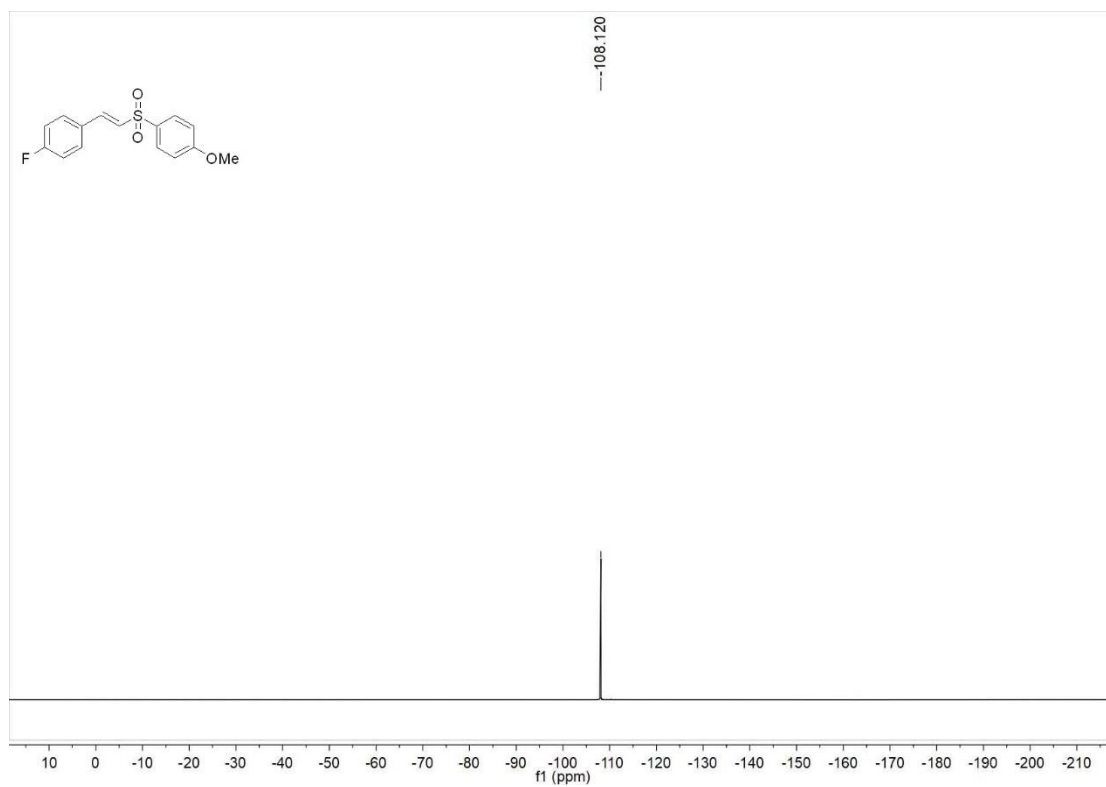

**(E)-1-Chloro-4-(2-((4-methoxyphenyl)sulfonyl)vinyl)benzene (4n)**

**<sup>1</sup>H NMR-spectrum (400 MHz, CDCl<sub>3</sub>) of 4n**

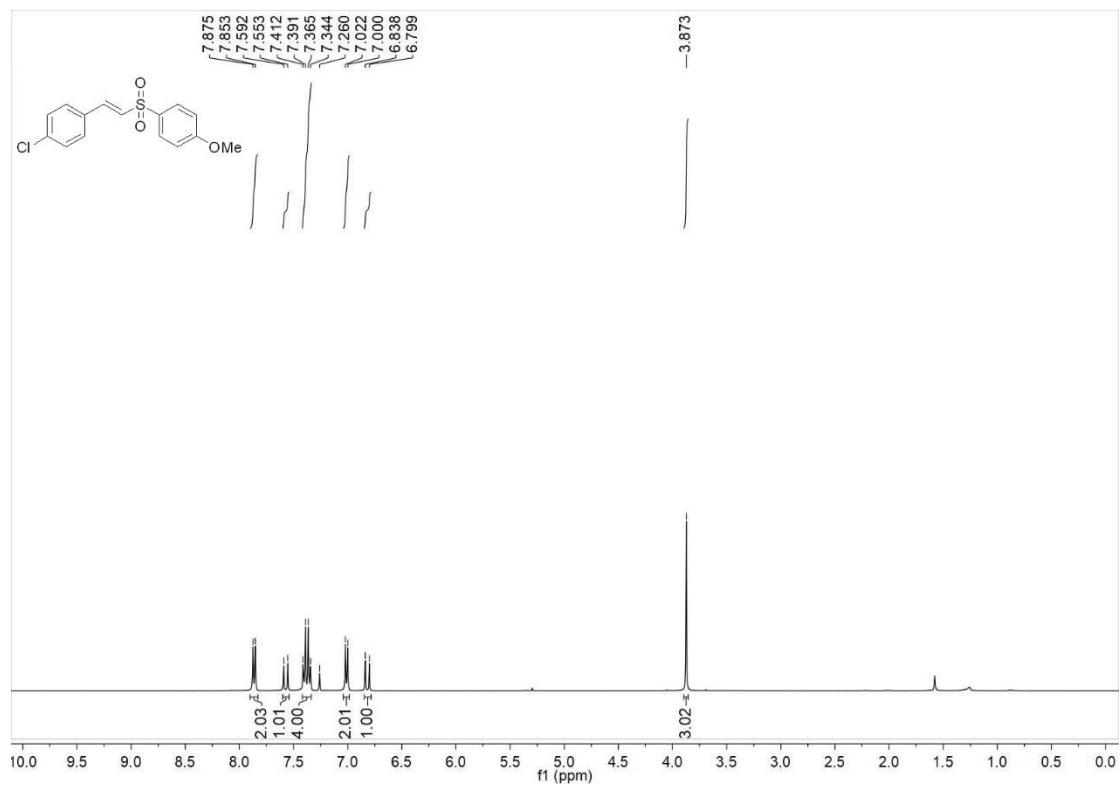

**<sup>13</sup>C NMR-spectrum (101 MHz, CDCl<sub>3</sub>) of 4n**

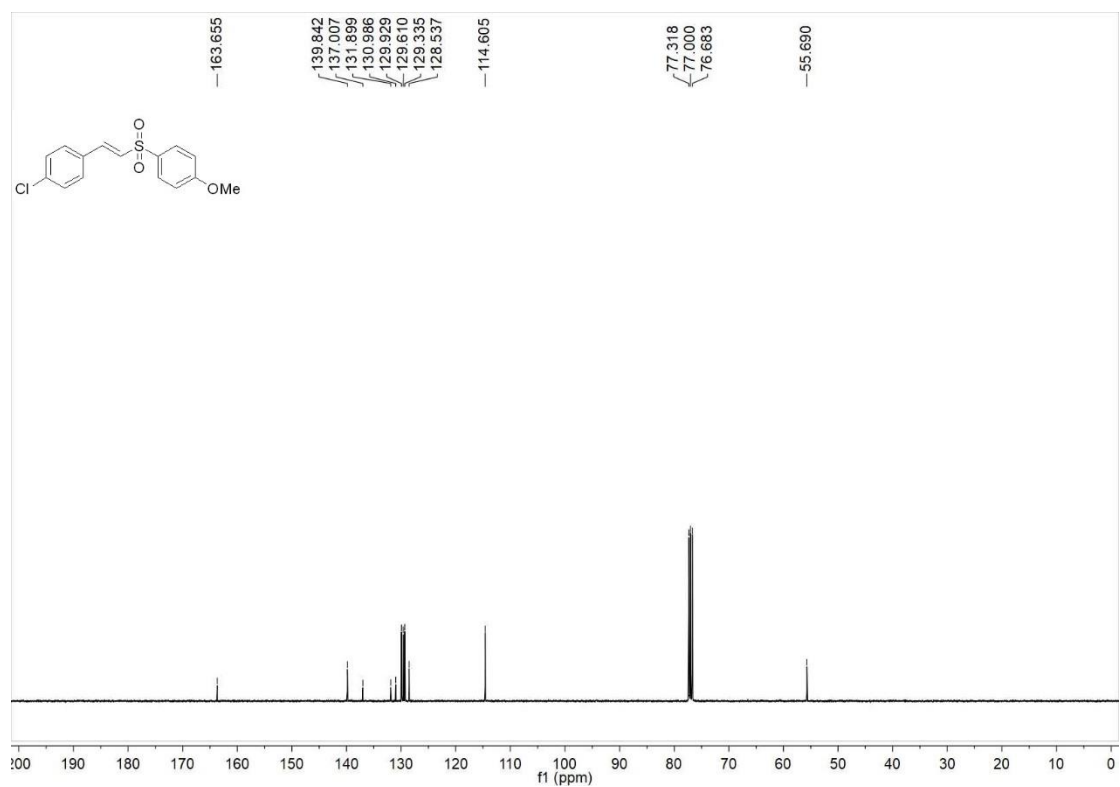

**(E)-1-Bromo-4-(2-((4-methoxyphenyl)sulfonyl)vinyl)benzene (4o)**

**<sup>1</sup>H NMR-spectrum (400 MHz, CDCl<sub>3</sub>) of 4o**

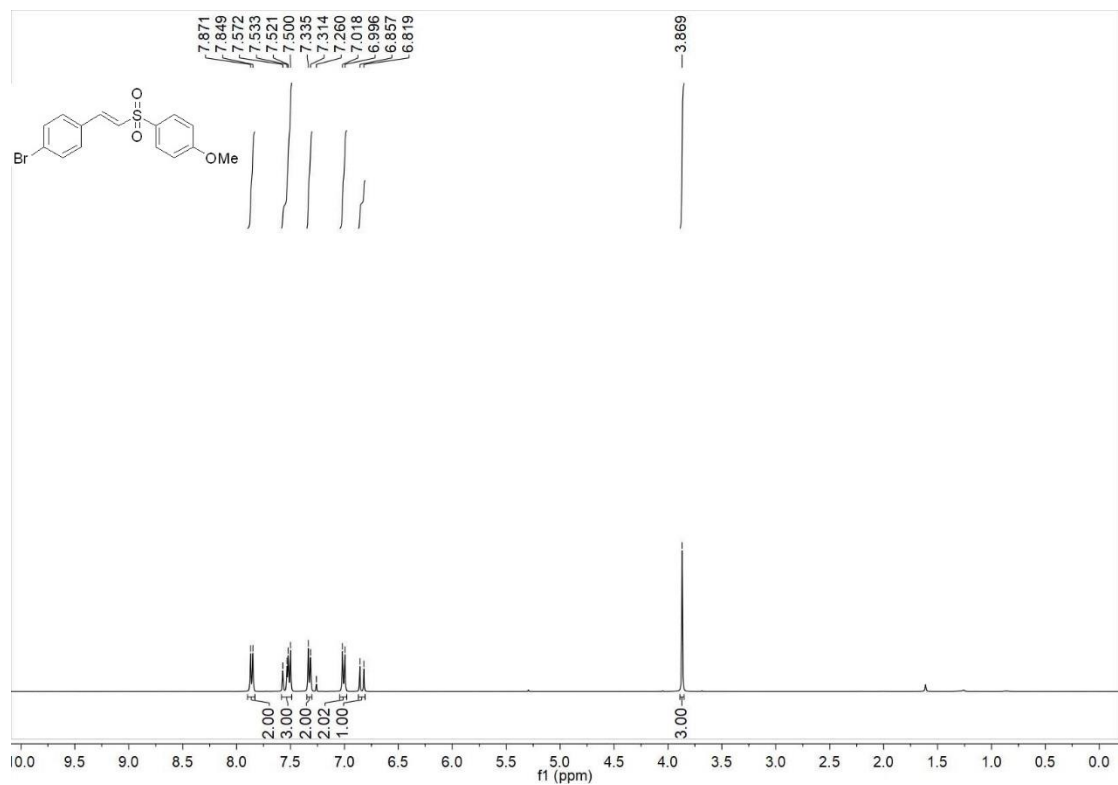

**<sup>13</sup>C NMR-spectrum (101 MHz, CDCl<sub>3</sub>) of 4o**

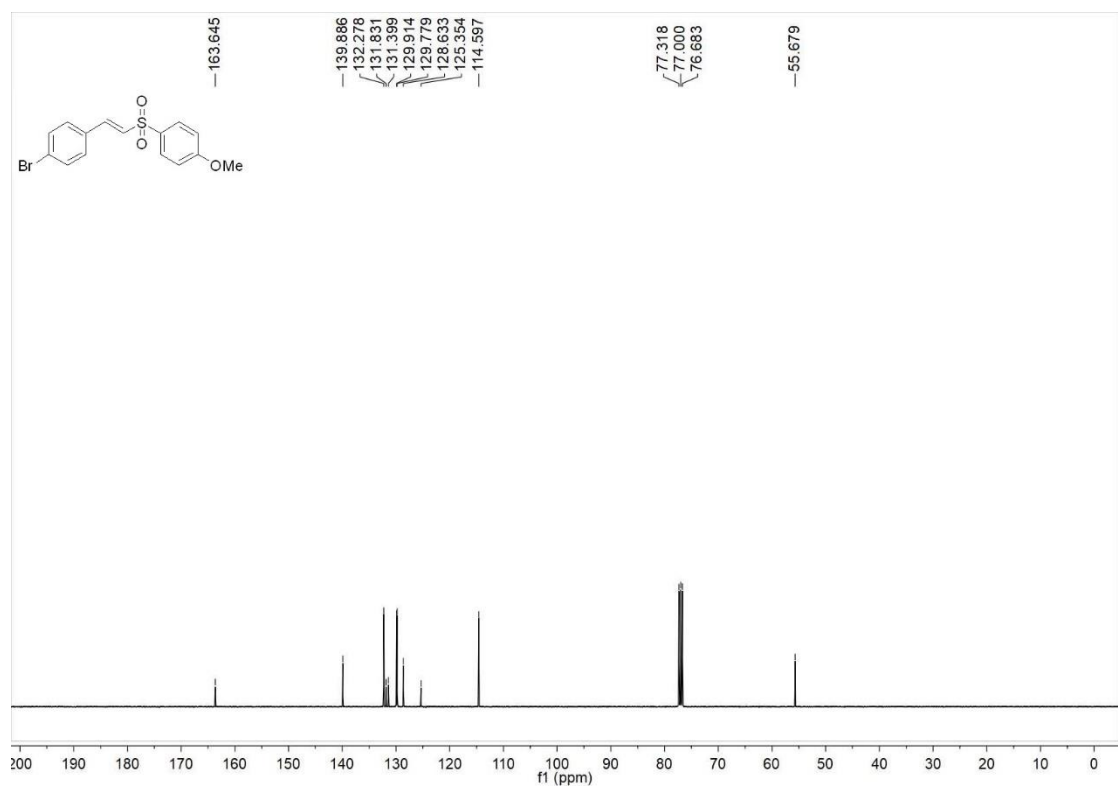

**(E)-1-Methoxy-4-((4-(trifluoromethyl)styryl)sulfonyl)benzene (4p)**

**<sup>1</sup>H NMR-spectrum (500 MHz, CDCl<sub>3</sub>) of 4p**

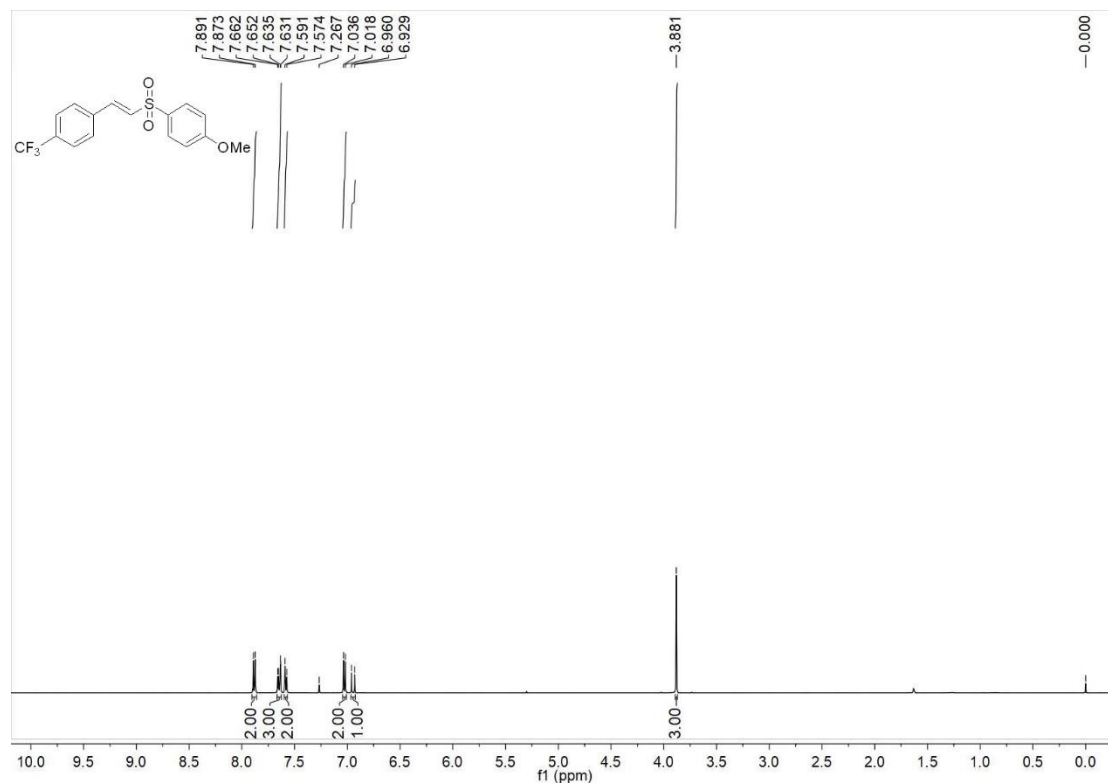

**<sup>13</sup>C NMR-spectrum (126 MHz, CDCl<sub>3</sub>) of 4p**

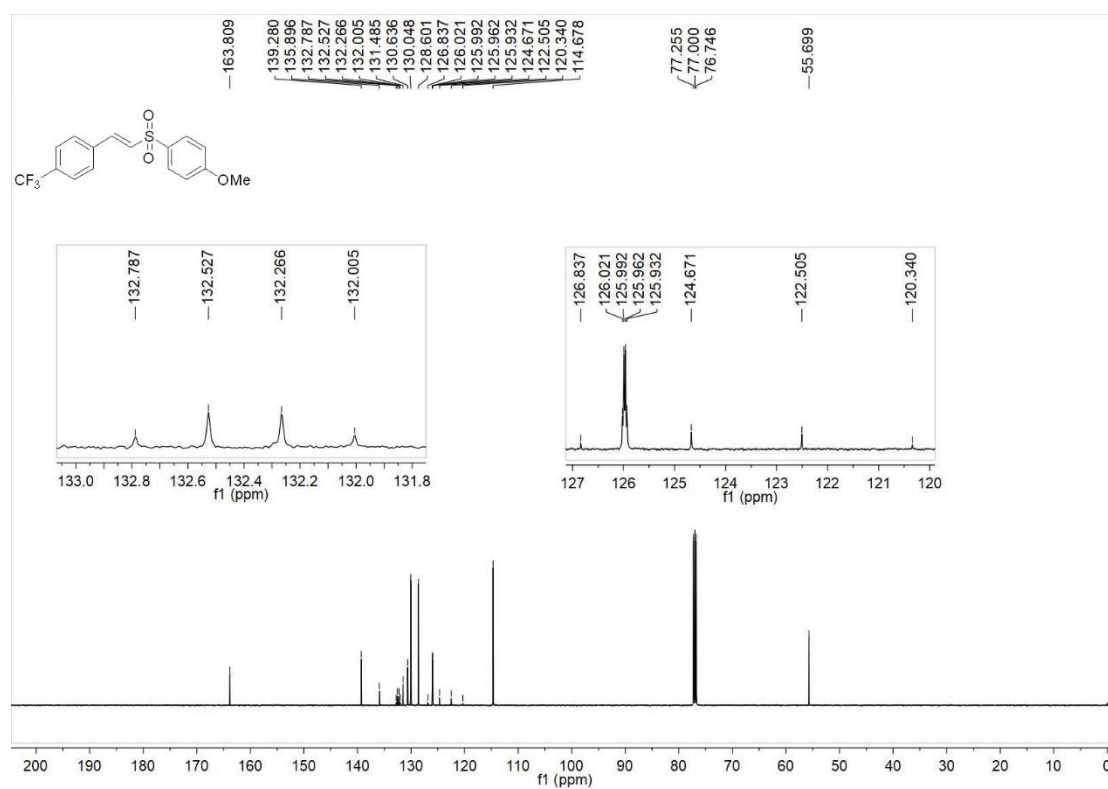

**<sup>19</sup>F NMR-spectrum (471 MHz, CDCl<sub>3</sub>) of 4p**

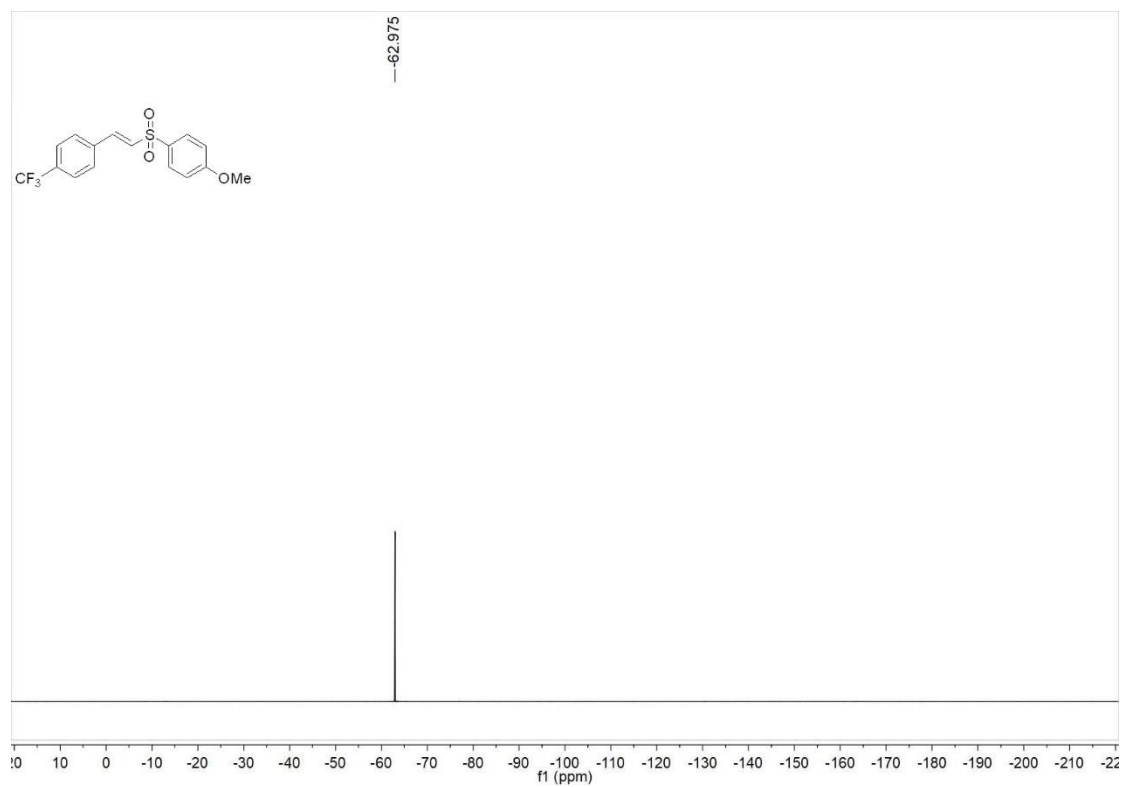

**(E)-1-Methoxy-4-((4-nitrostyryl)sulfonyl)benzene (4q)**

**<sup>1</sup>H NMR-spectrum (400 MHz, CDCl<sub>3</sub>) of 4q**

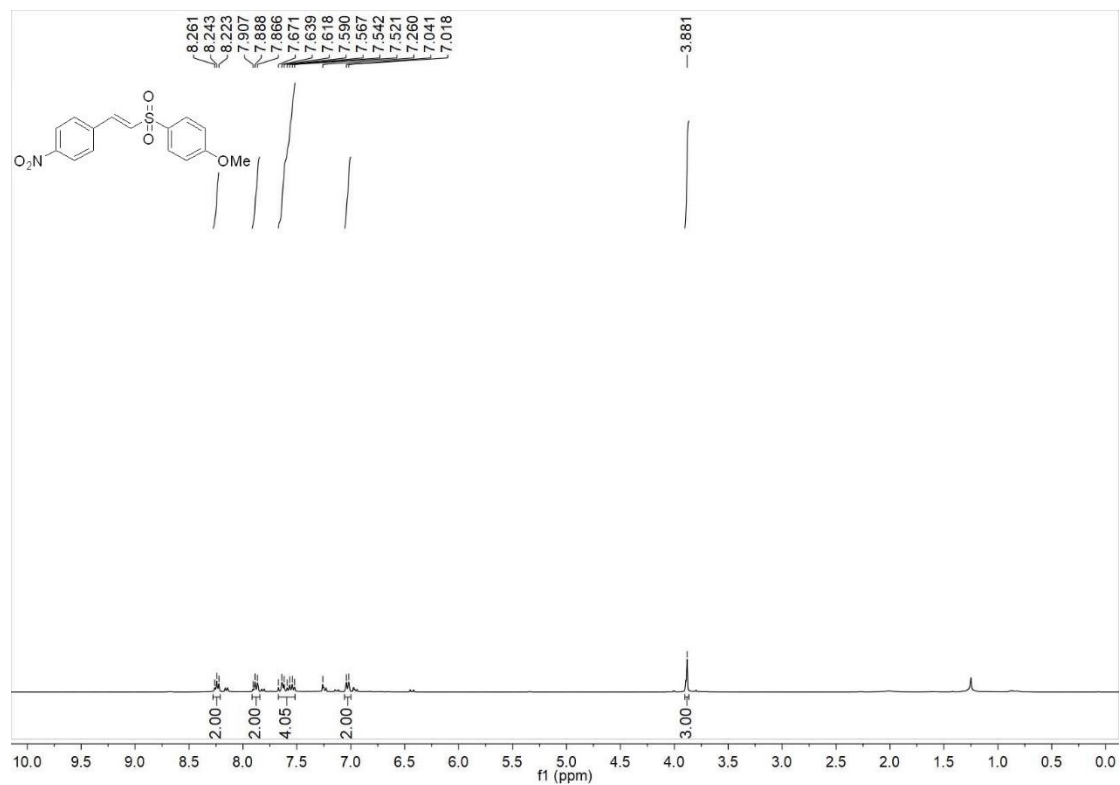

**<sup>13</sup>C NMR-spectrum (101 MHz, CDCl<sub>3</sub>) of 4q**

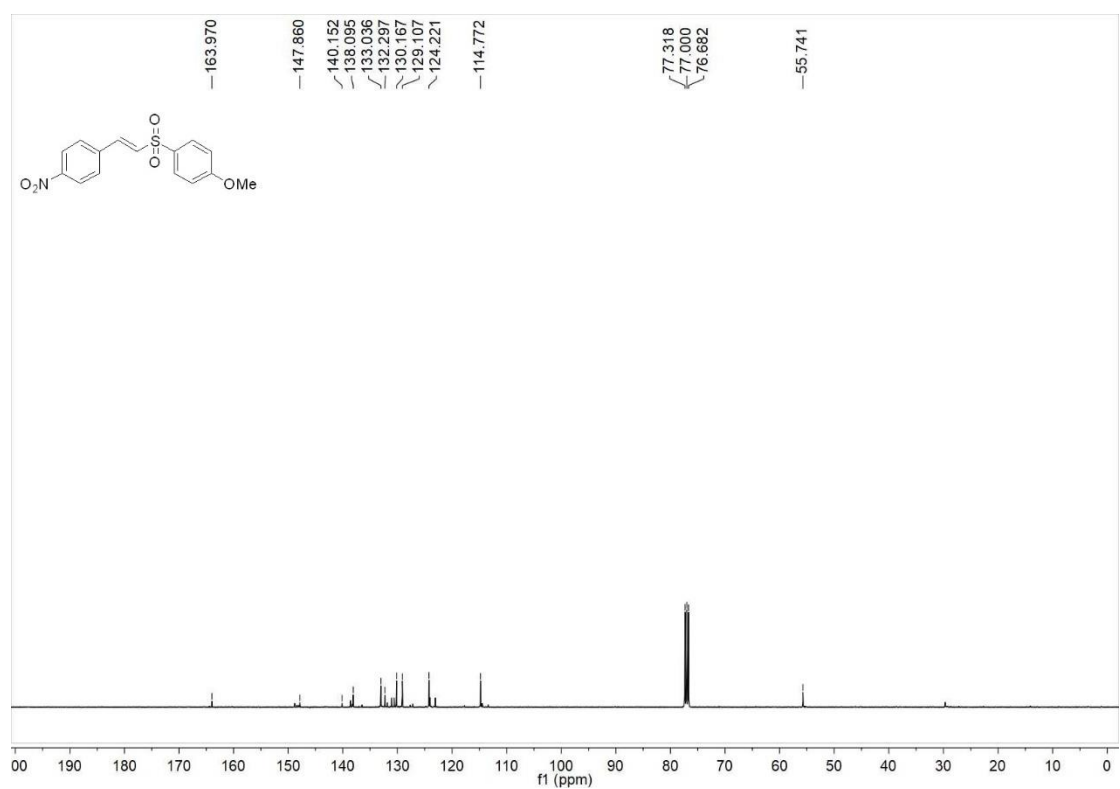



**(E)-4-(2-((4-Methoxyphenyl)sulfonyl)vinyl)benzaldehyde (4r)**

**<sup>1</sup>H NMR-spectrum (400 MHz, CDCl<sub>3</sub>) of 4r**

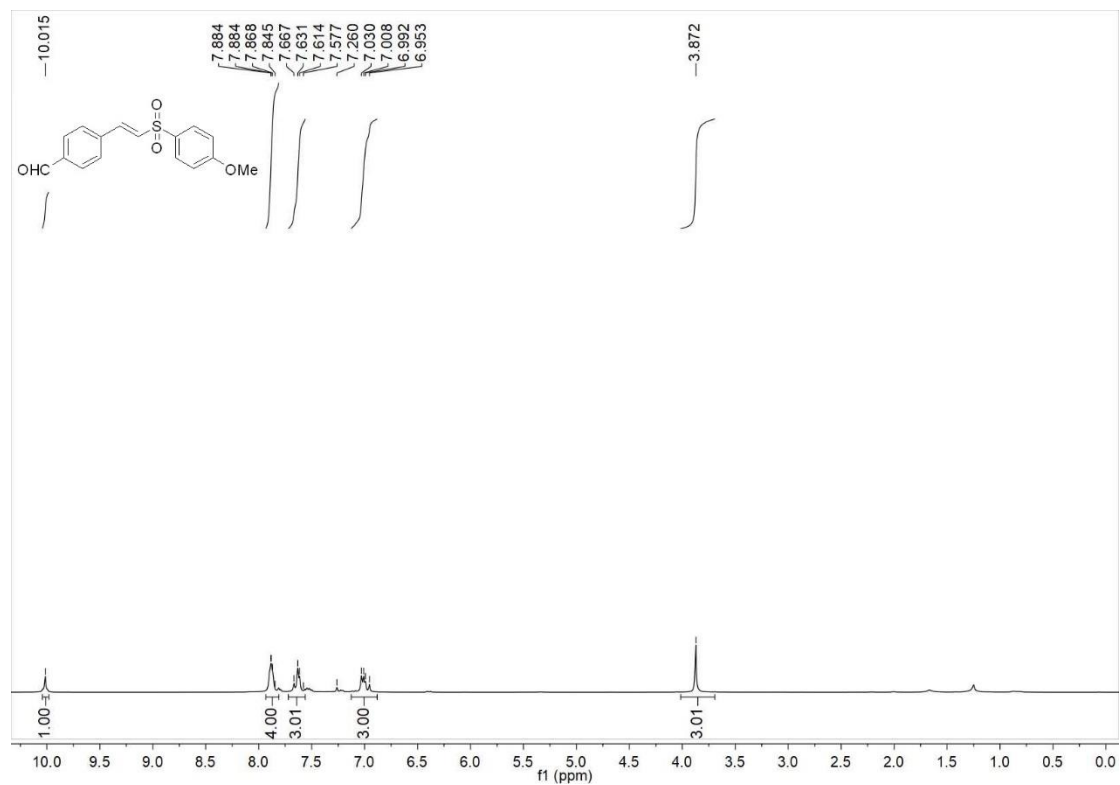

**<sup>13</sup>C NMR-spectrum (101 MHz, CDCl<sub>3</sub>) of 4r**

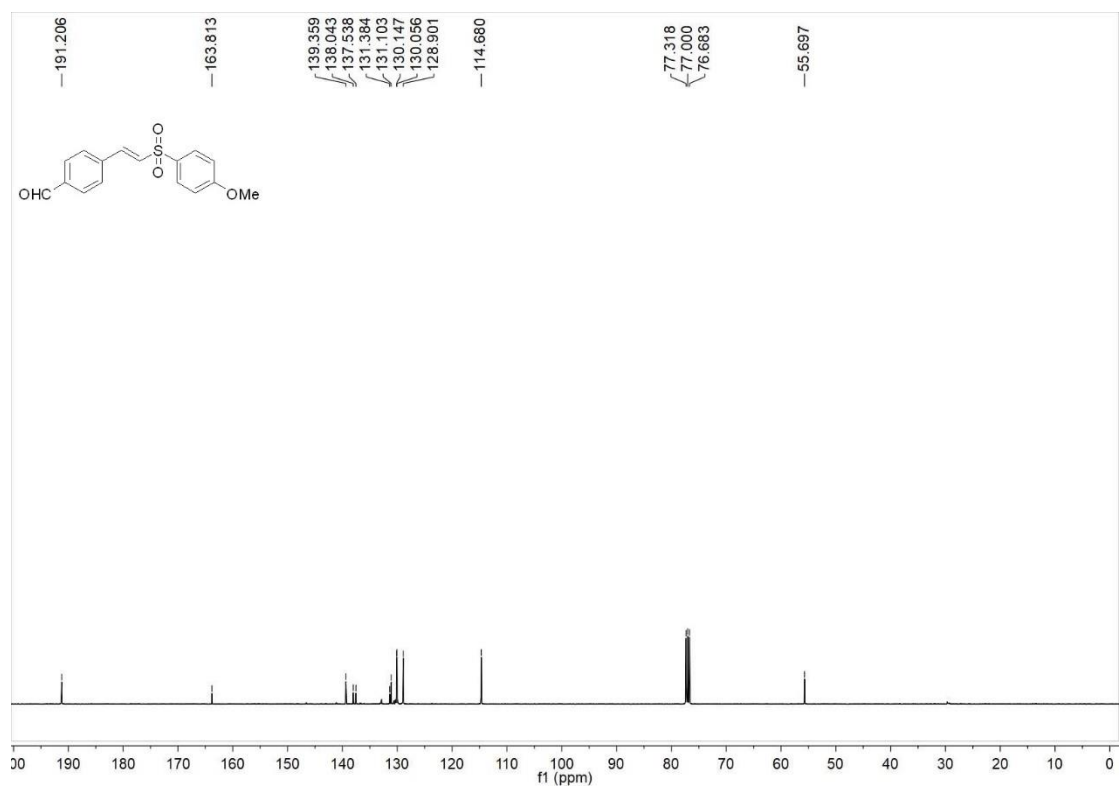

**(E)-1-(2-((4-Methoxyphenyl)sulfonyl)vinyl)naphthalene (4s)**

**<sup>1</sup>H NMR-spectrum (500 MHz, CDCl<sub>3</sub>) of 4s**

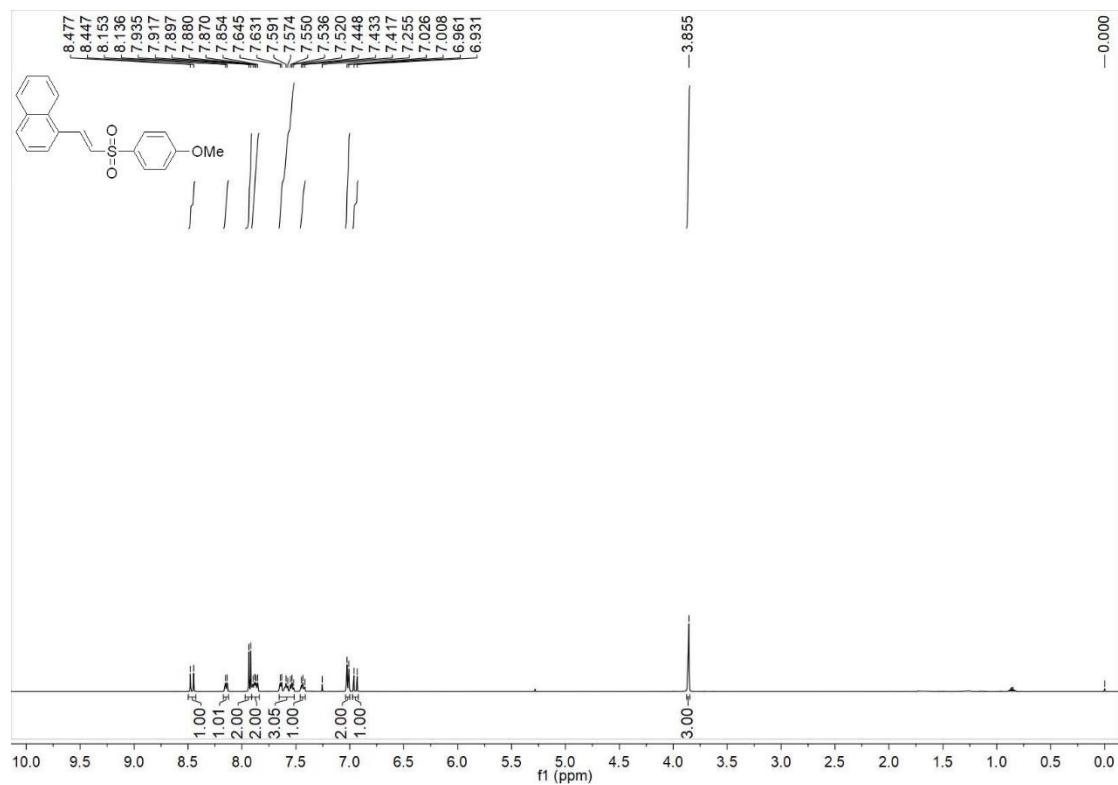

**<sup>13</sup>C NMR-spectrum (126 MHz, CDCl<sub>3</sub>) of 4s**

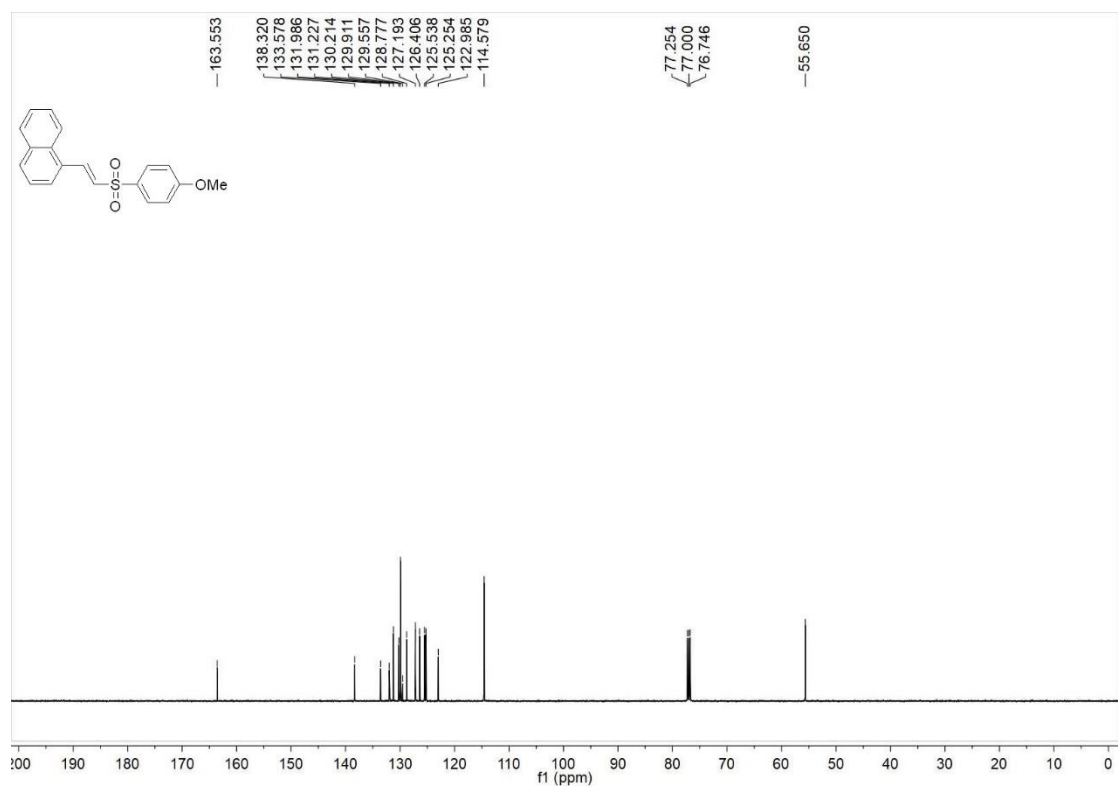

**(E)-2-(2-((4-Methoxyphenyl)sulfonyl)vinyl)thiophene (4t)**

**<sup>1</sup>H NMR-spectrum (500 MHz, CDCl<sub>3</sub>) of 4t**

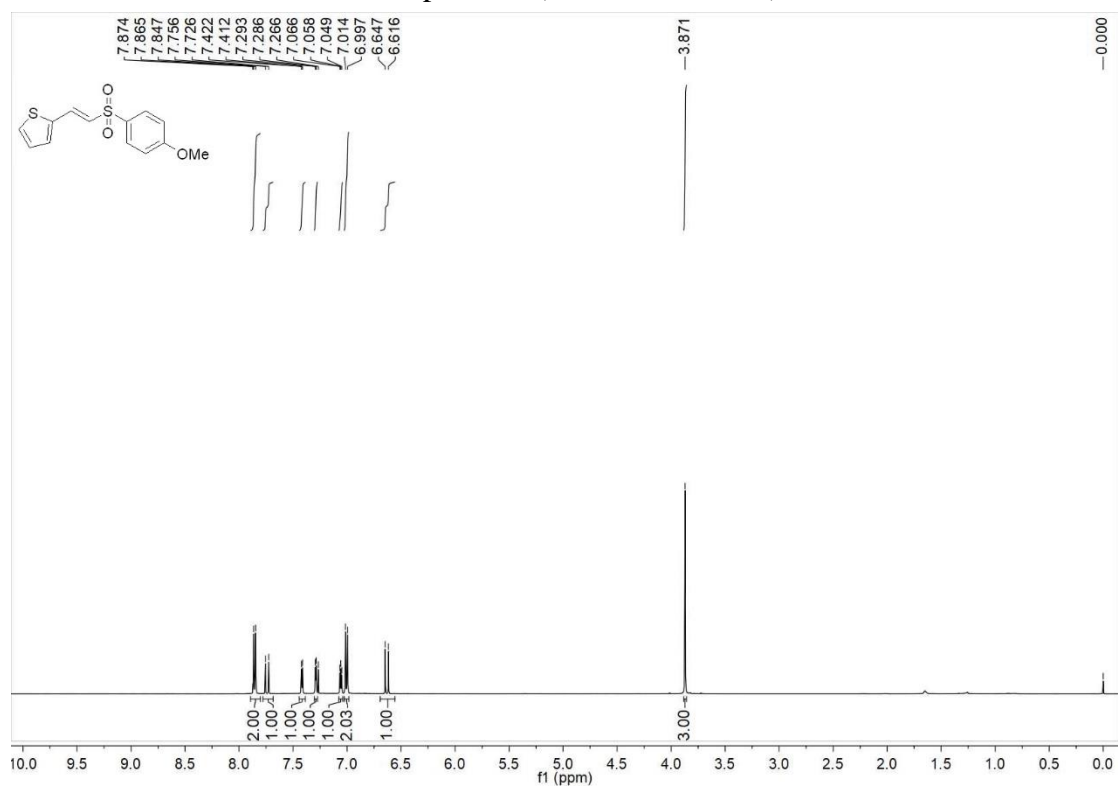

**<sup>13</sup>C NMR-spectrum (126 MHz, CDCl<sub>3</sub>) of 4t**

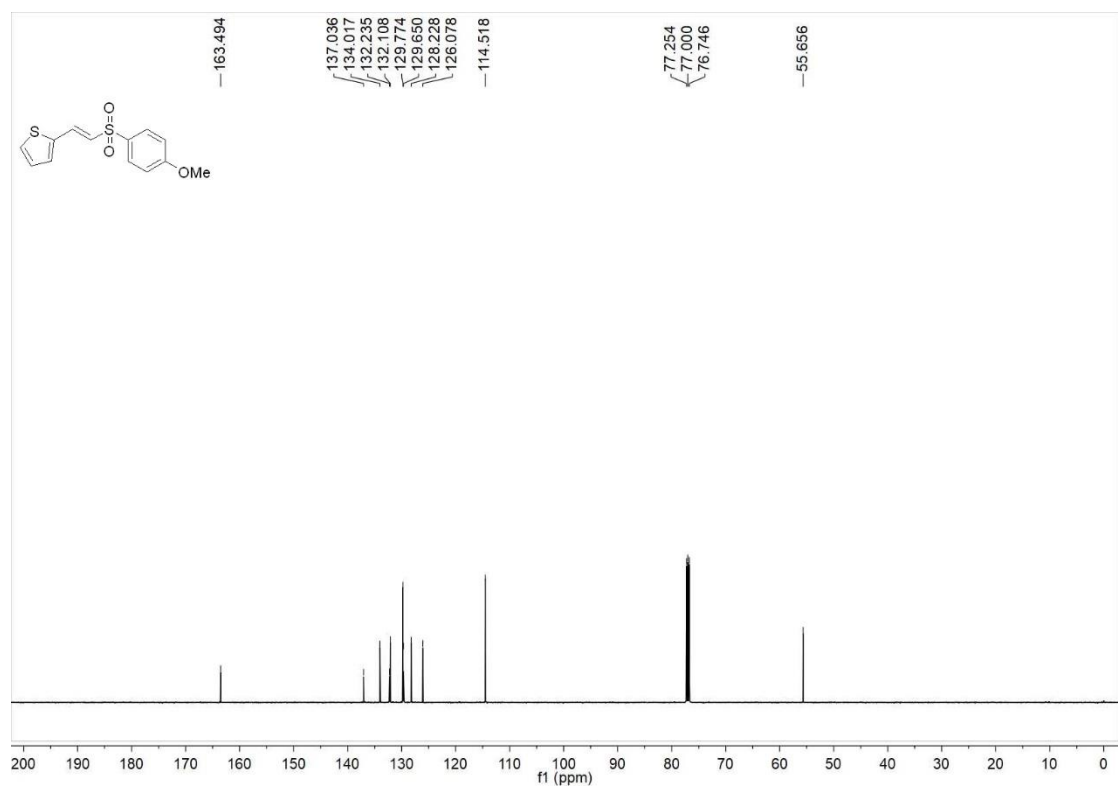

**(E)-1-(Hex-1-en-1-ylsulfonyl)-4-methoxybenzene (4u)**

**<sup>1</sup>H NMR-spectrum (500 MHz, CDCl<sub>3</sub>) of 4u**

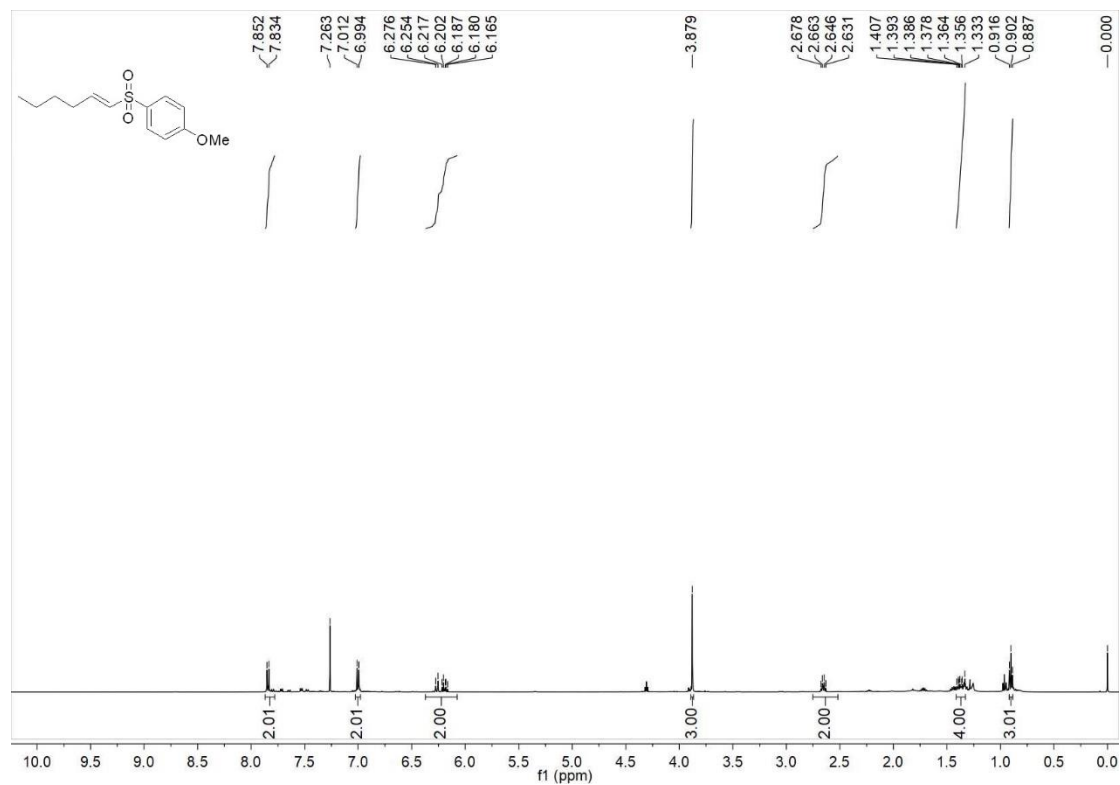

**<sup>13</sup>C NMR-spectrum (126 MHz, CDCl<sub>3</sub>) of 4u**

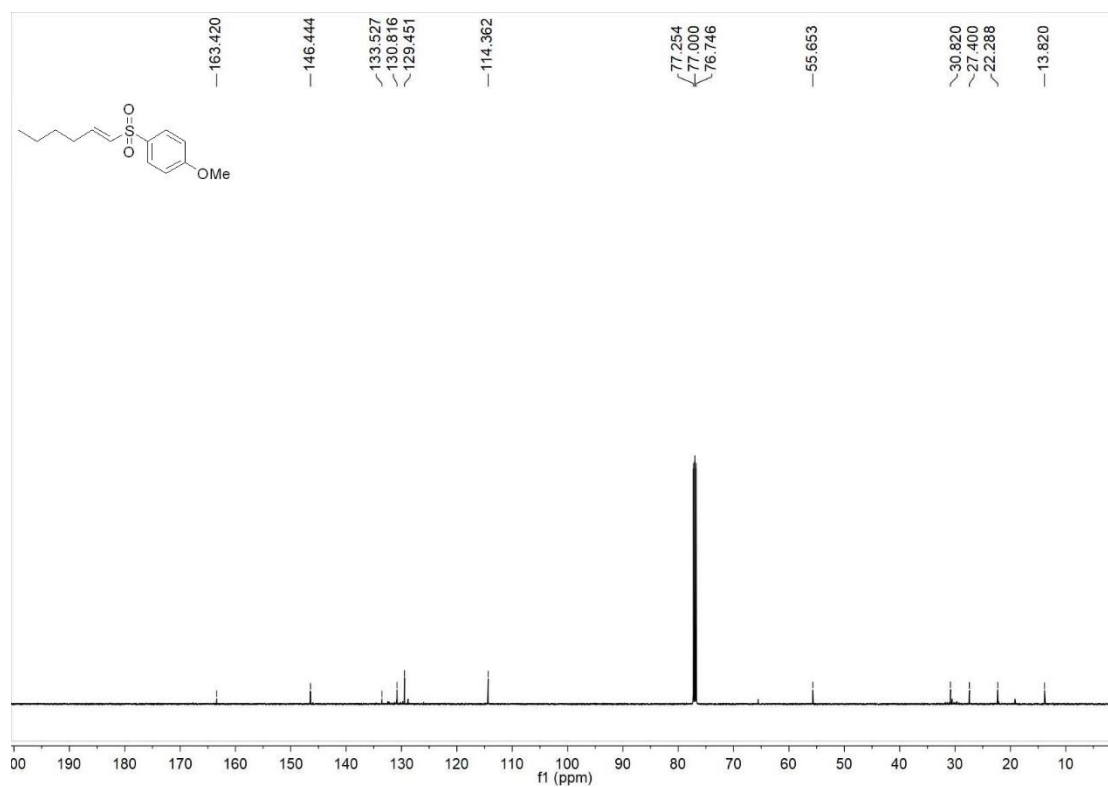

**(E)-1-Methoxy-4-(oct-1-en-1-ylsulfonyl)benzene (4v)**

**<sup>1</sup>H NMR-spectrum (500 MHz, CDCl<sub>3</sub>) of 4v**

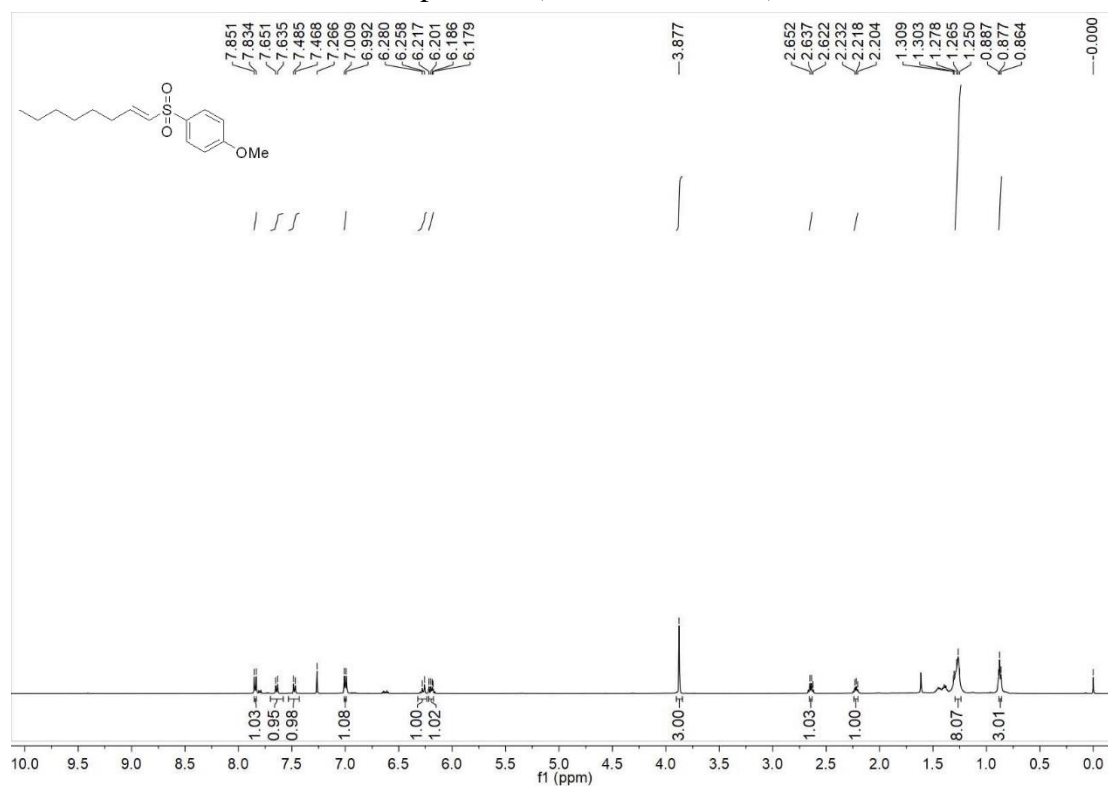

**<sup>13</sup>C NMR-spectrum (126 MHz, CDCl<sub>3</sub>) of 4v**

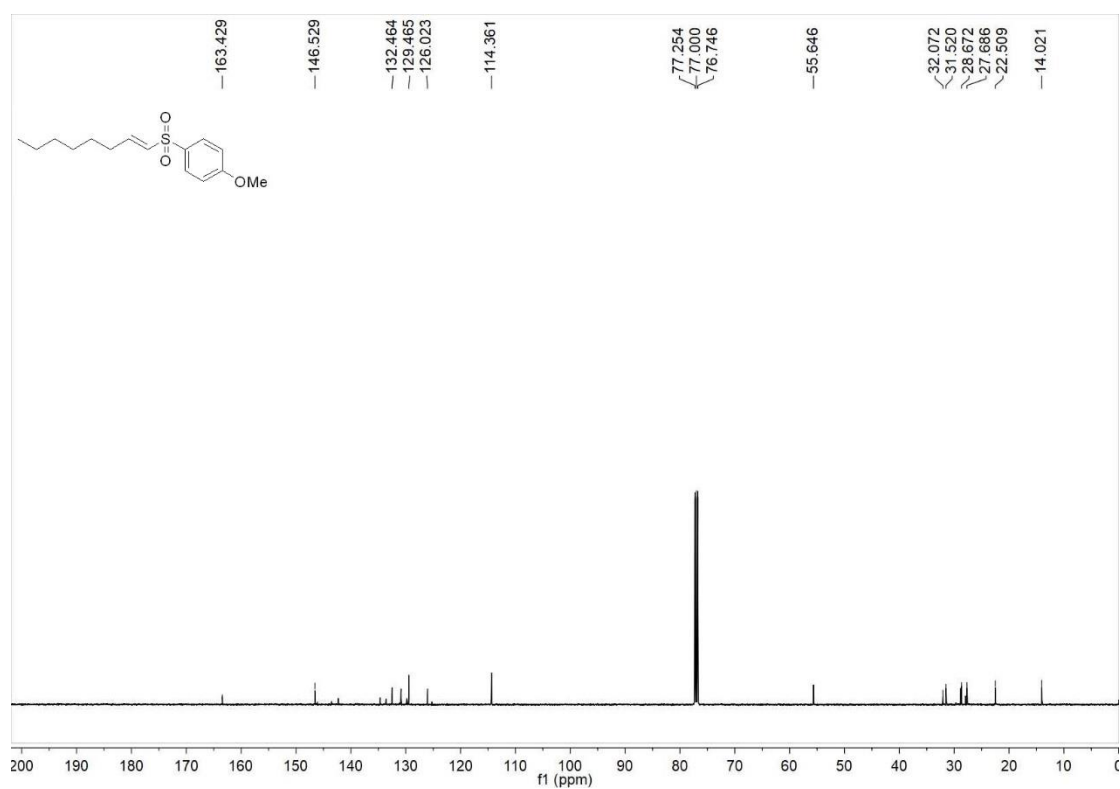

**(E)-1-(Dodec-1-en-1-ylsulfonyl)-4-methoxybenzene (4w)**

**<sup>1</sup>H NMR-spectrum (400 MHz, CDCl<sub>3</sub>) of 4w**

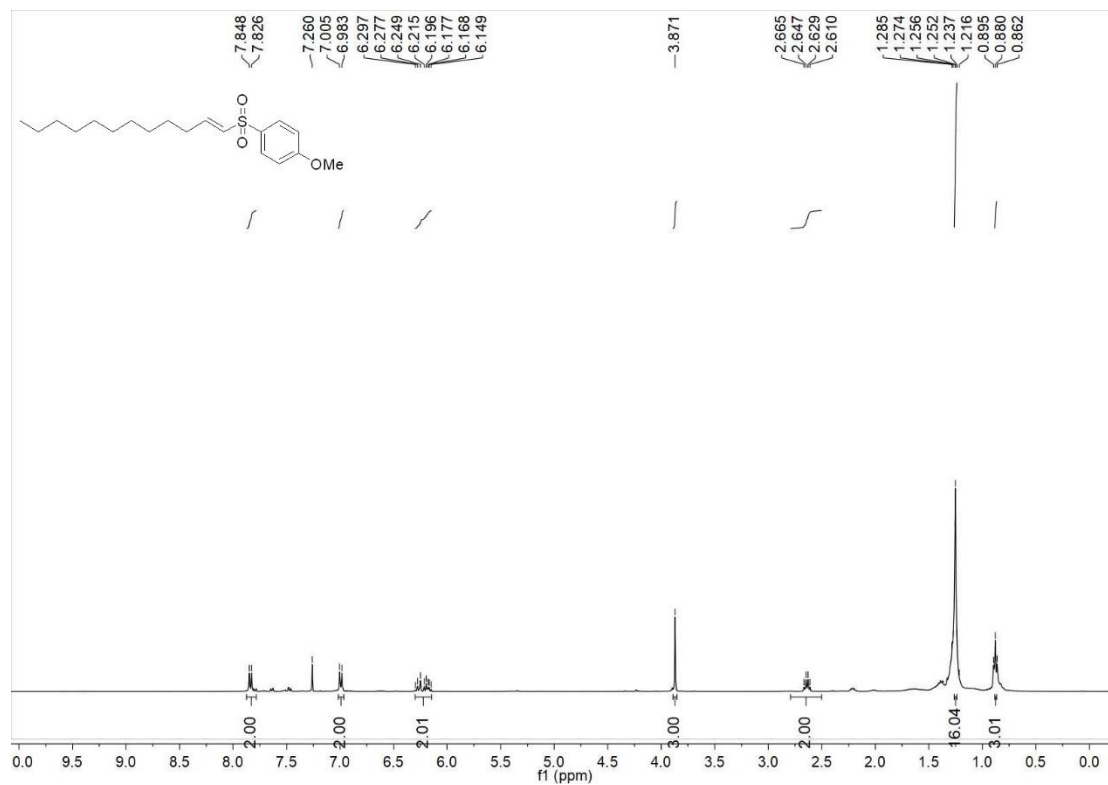

**<sup>13</sup>C NMR-spectrum (101 MHz, CDCl<sub>3</sub>) of 4w**

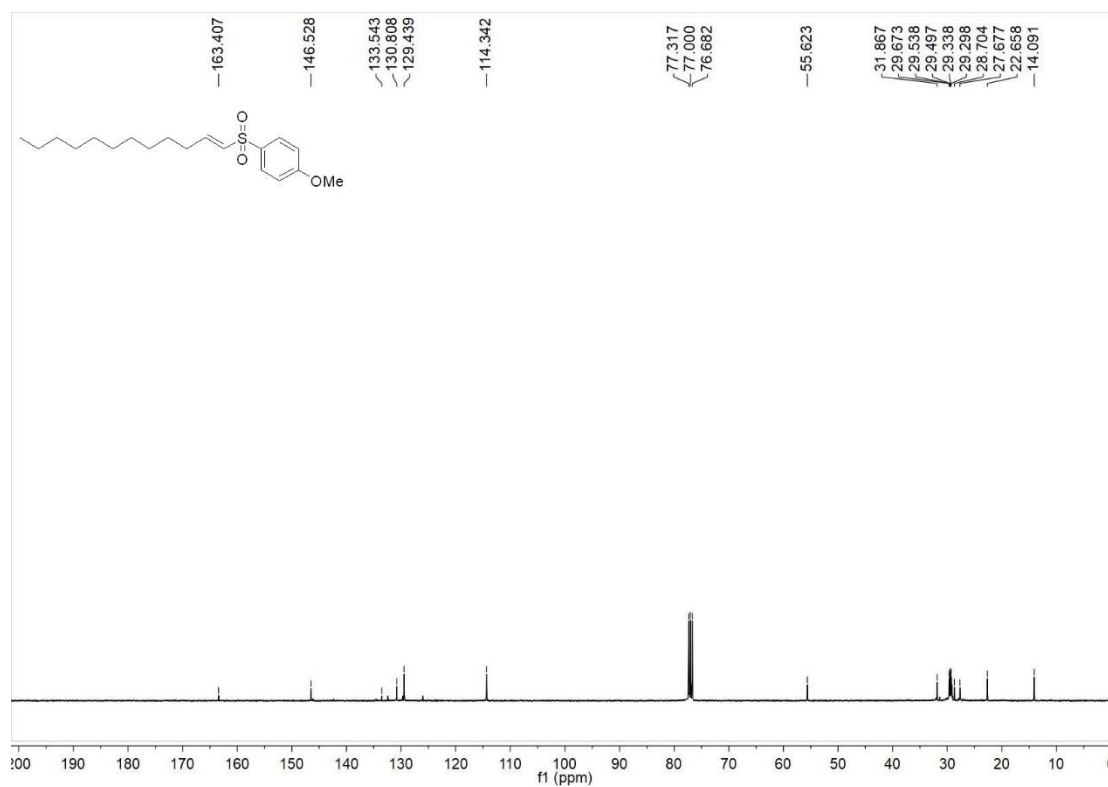

**(E)-1-Methoxy-4-((4-phenylbut-1-en-1-yl)sulfonyl)benzene (4x)**

**<sup>1</sup>H NMR-spectrum (500 MHz, CDCl<sub>3</sub>) of 4x**

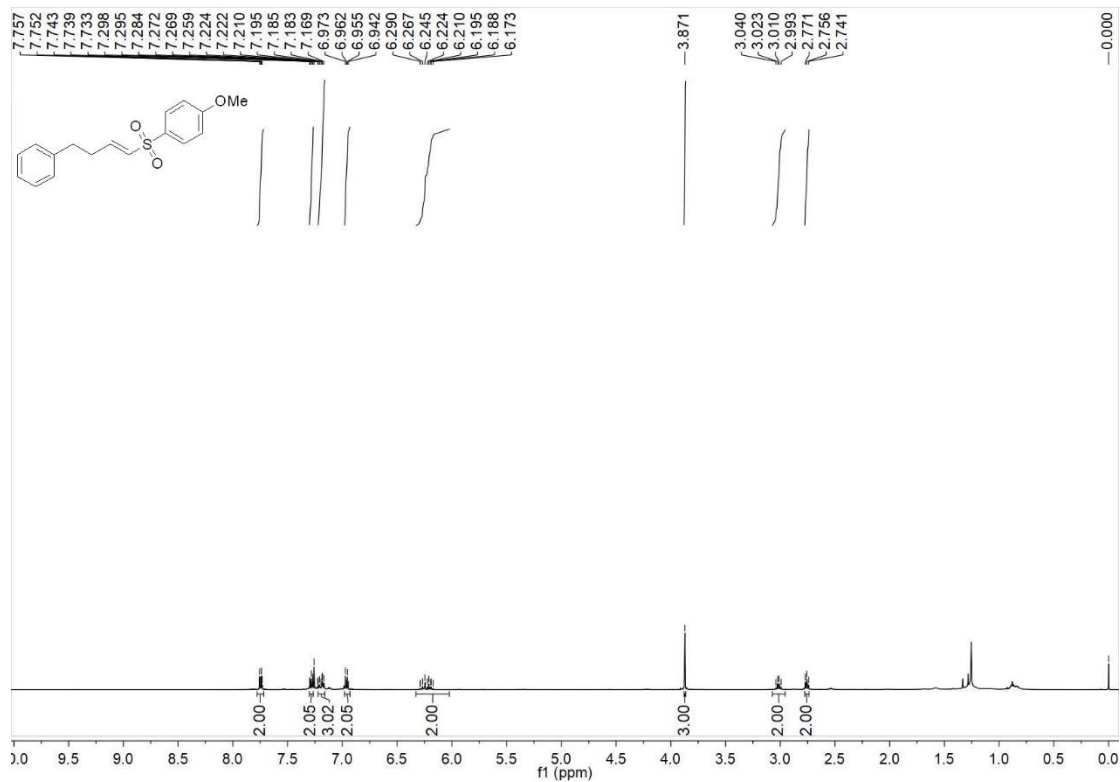

**<sup>13</sup>C NMR-spectrum (126 MHz, CDCl<sub>3</sub>) of 4x**

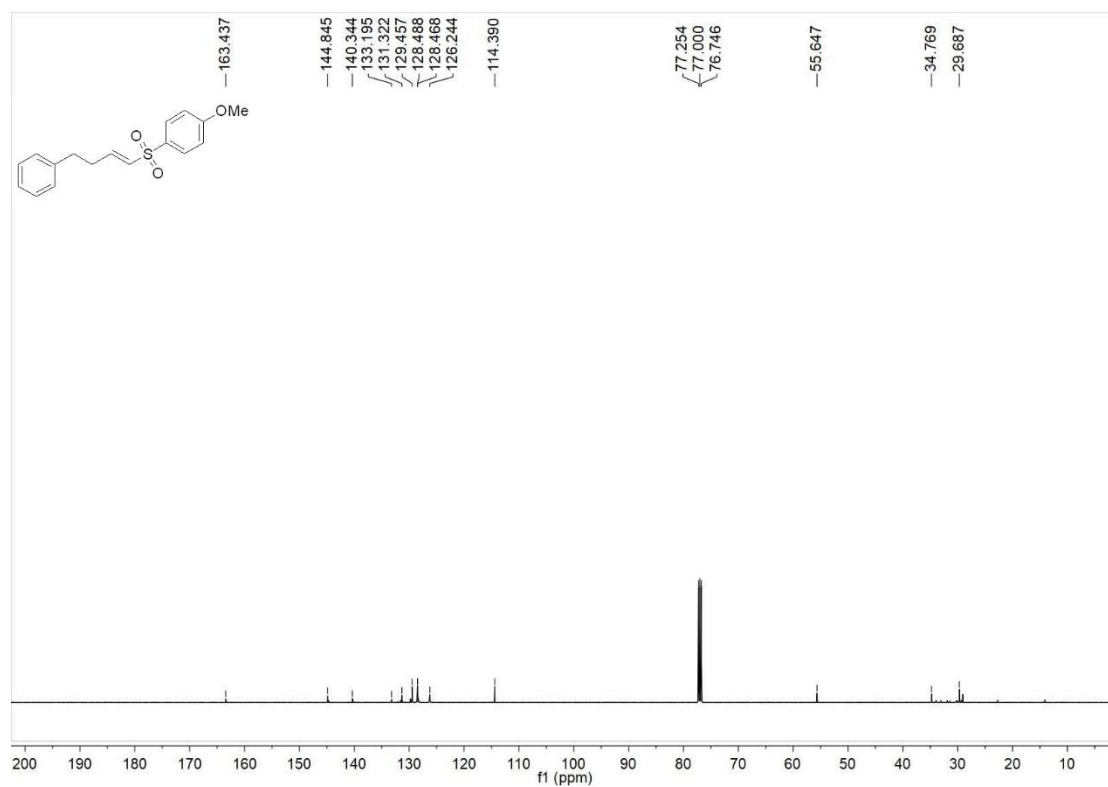

# 1-Methoxy-4-((2-phenylpent-2-en-1-yl)sulfonyl)benzene (7a)

## <sup>1</sup>H NMR-spectrum (500 MHz, CDCl<sub>3</sub>) of 7a

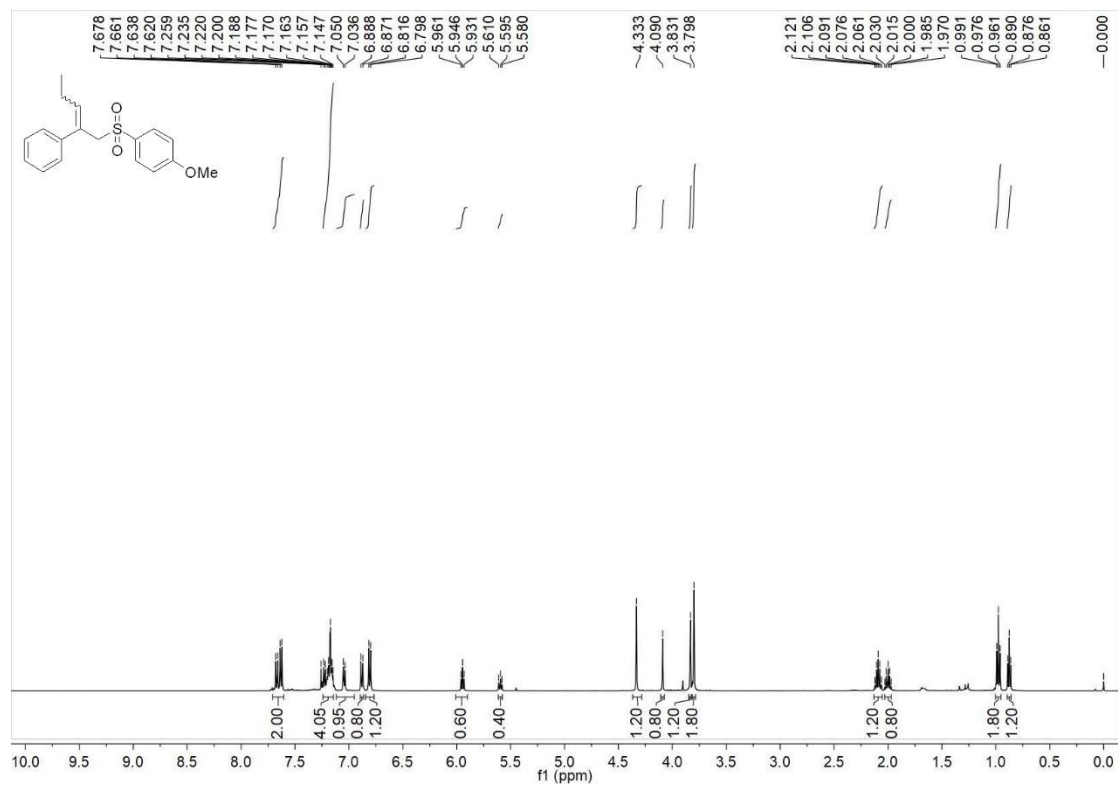

## <sup>13</sup>C NMR-spectrum (126 MHz, CDCl<sub>3</sub>) of 7a

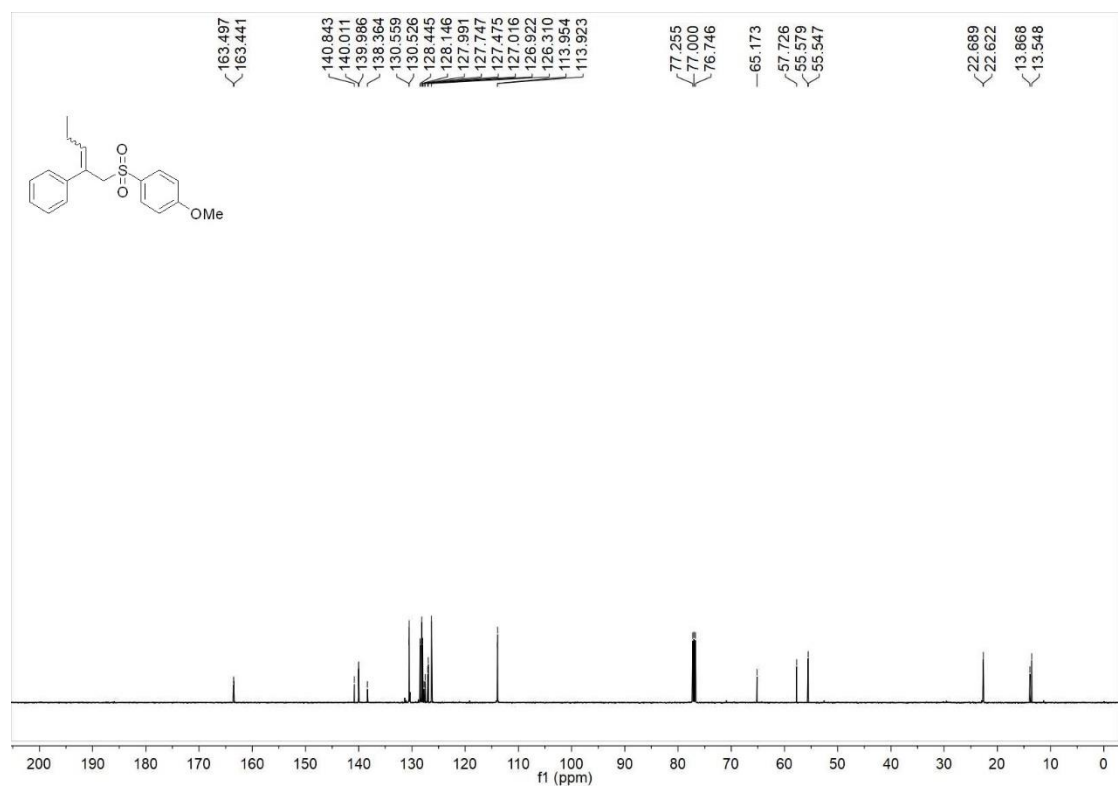



# 1,2-Bis(4-(trifluoromethyl)phenyl)disulfane (8a)

<sup>1</sup>H NMR-spectrum (500 MHz, CDCl<sub>3</sub>) of 8a

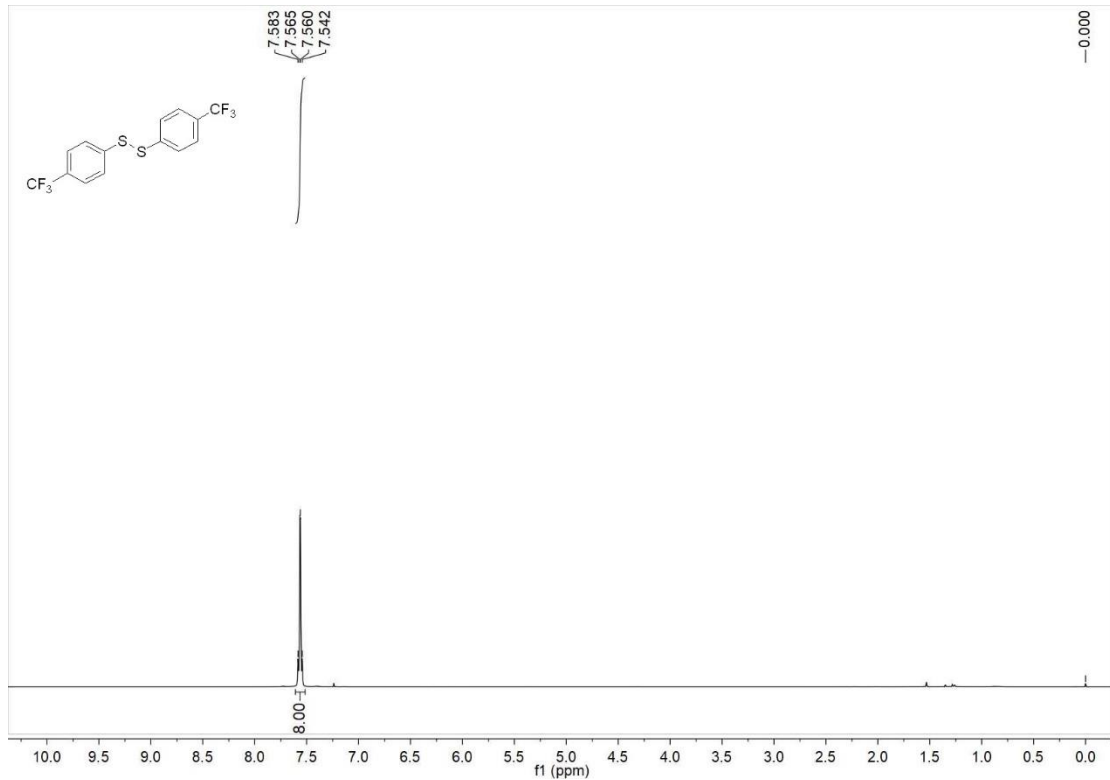

<sup>13</sup>C NMR-spectrum (126 MHz, CDCl<sub>3</sub>) of 8a

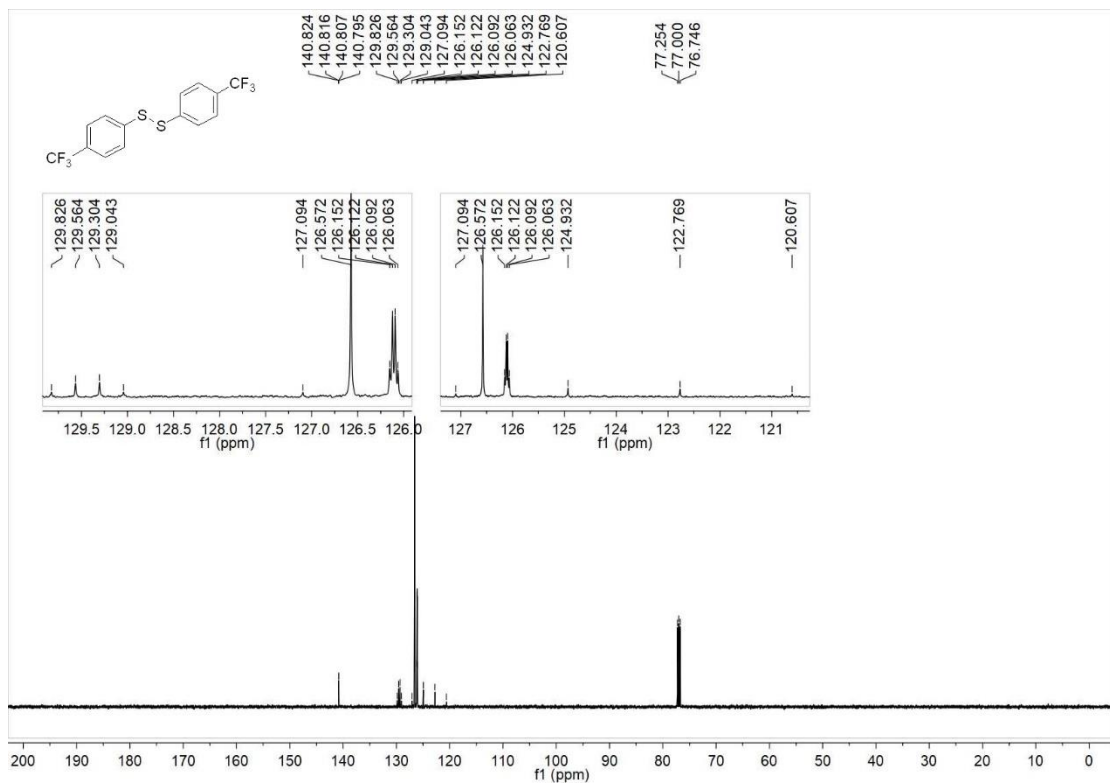

**<sup>19</sup>F NMR-spectrum (471 MHz, CDCl<sub>3</sub>) of **8a****

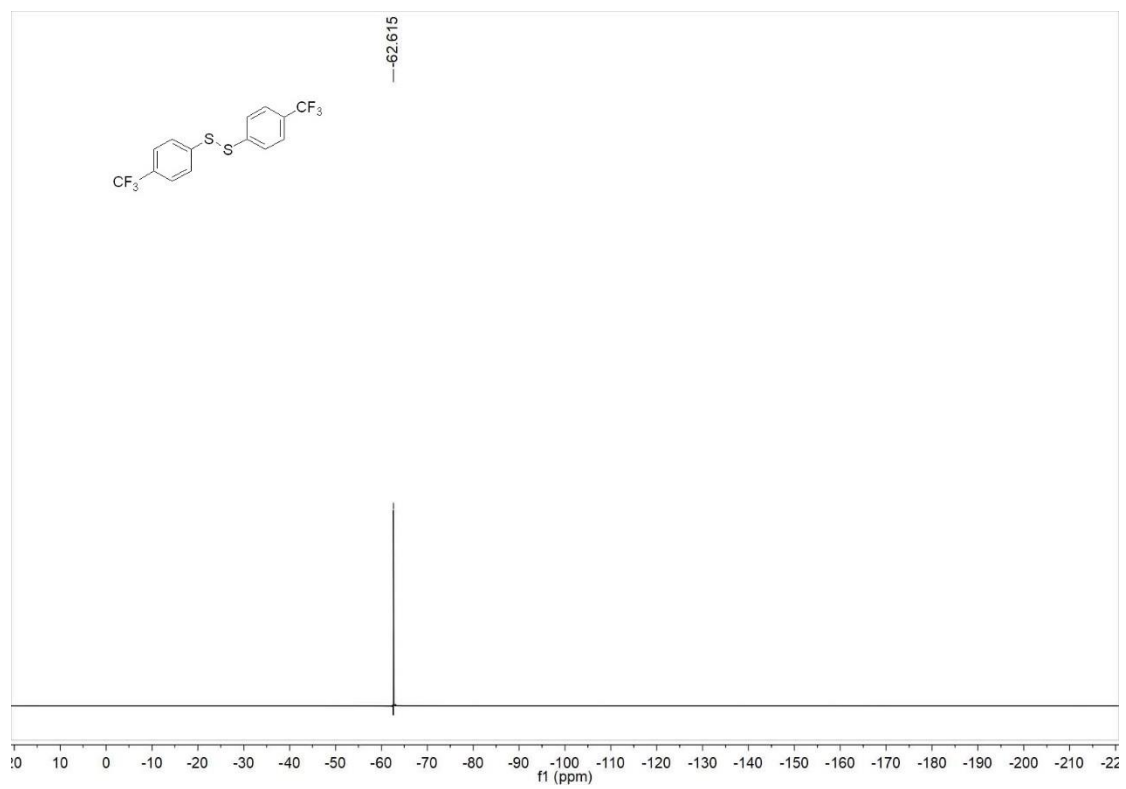

**(E)-1-Methoxy-4-((2-(*p*-tolyl)vinyl-2-d)sulfonyl)benzene (4a-D)**

**<sup>1</sup>H NMR-spectrum (500 MHz, CDCl<sub>3</sub>) of 4a-D**

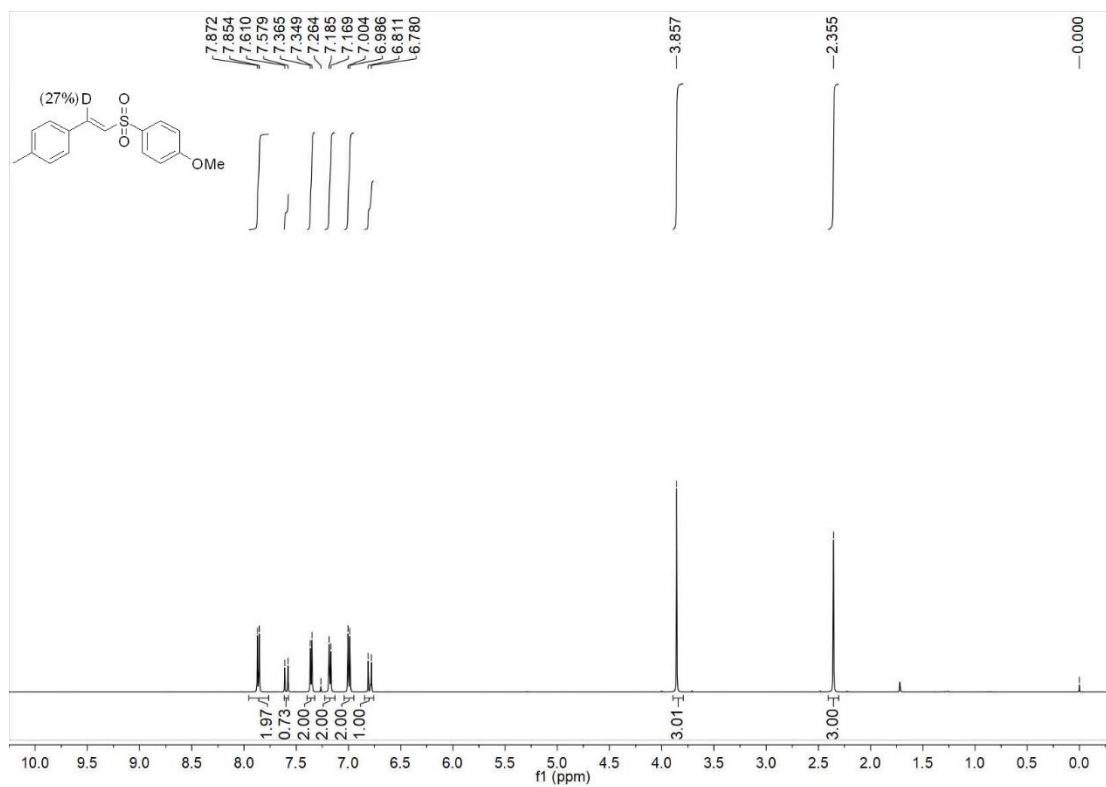

**<sup>13</sup>C NMR-spectrum (126 MHz, CDCl<sub>3</sub>) of 4a-D**

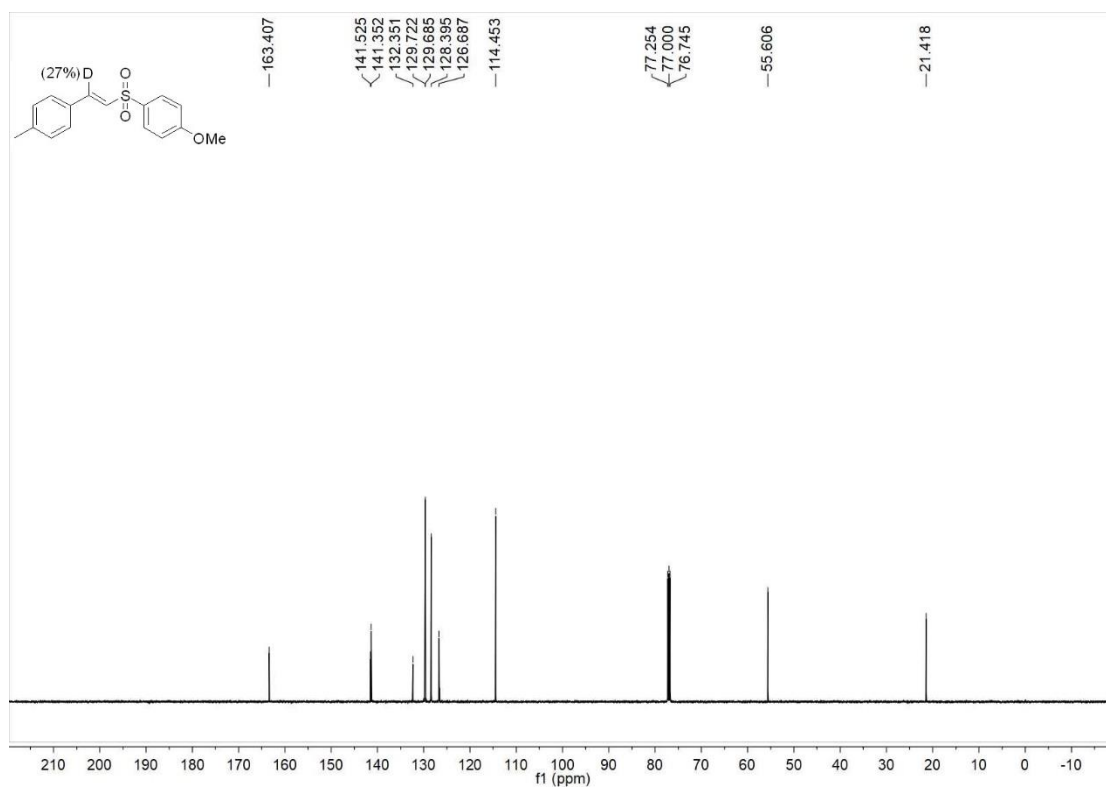

**4,4'-Dimethoxybiphenyl (9a)**  
**<sup>1</sup>H NMR-spectrum (500 MHz, CDCl<sub>3</sub>) of 9a**

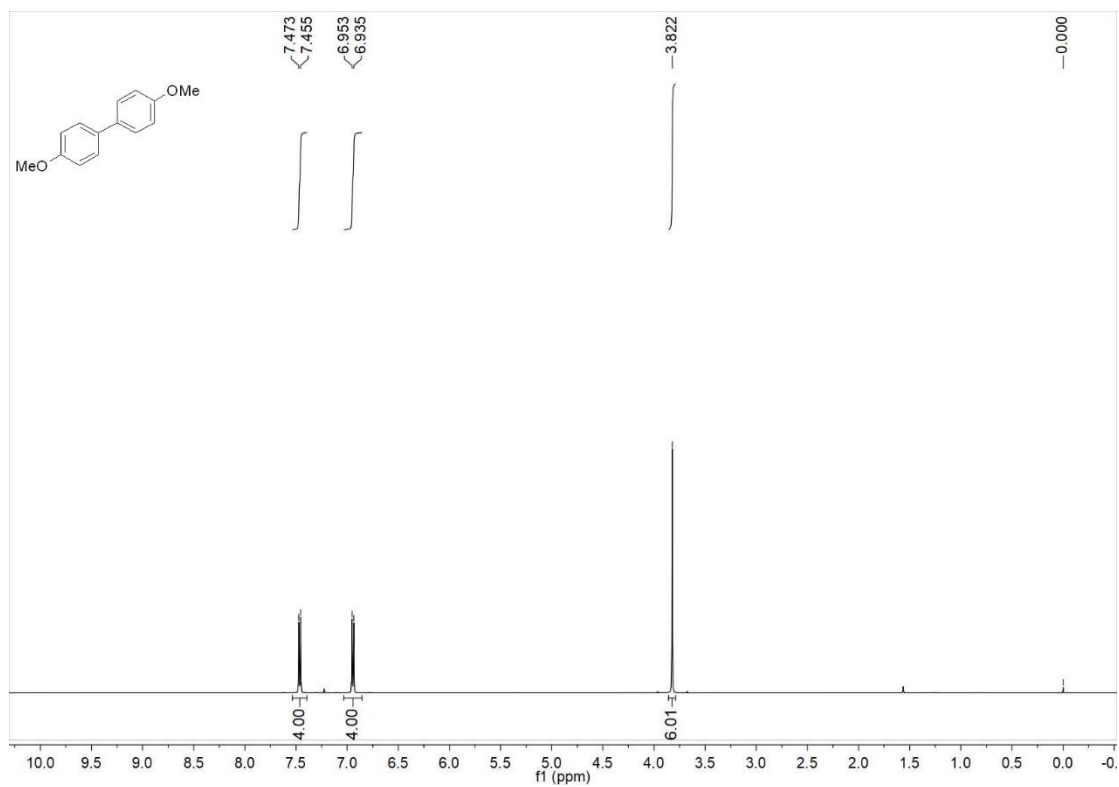

**<sup>13</sup>C NMR-spectrum (126 MHz, CDCl<sub>3</sub>) of 9a**

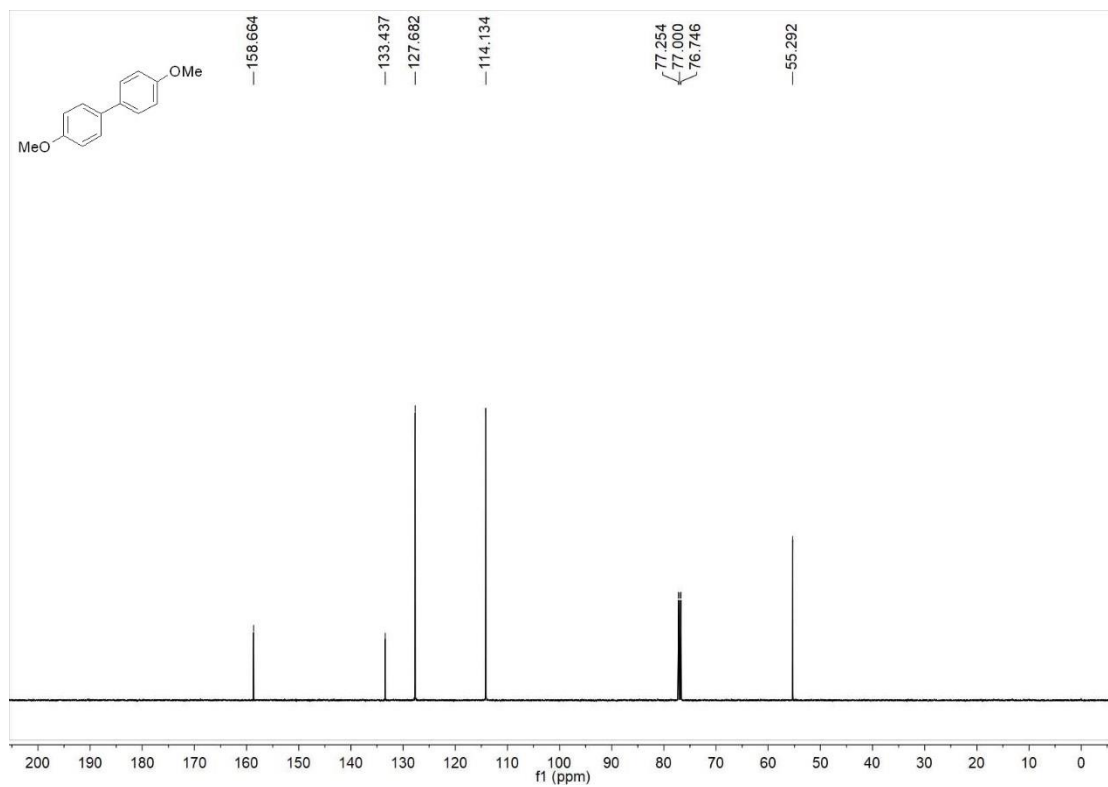

**(G) The X-ray single-crystal diffraction analysis of product 4a**

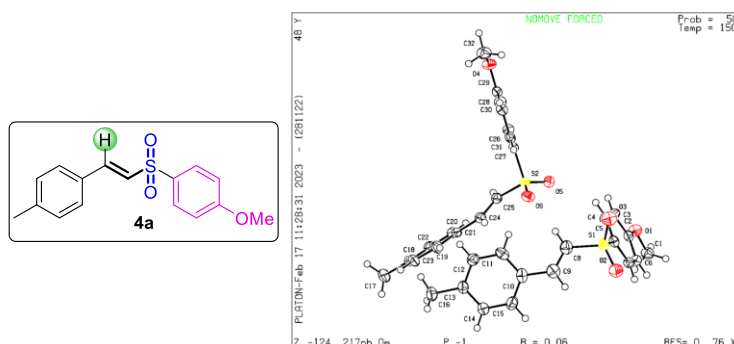

**Table 1** Crystal data and structure refinement for **4a**.

|                                             |                                                               |
|---------------------------------------------|---------------------------------------------------------------|
| Identification code                         | <b>4a</b>                                                     |
| Empirical formula                           | C <sub>16</sub> H <sub>16</sub> O <sub>3</sub> S              |
| Formula weight                              | 288.35                                                        |
| Temperature/K                               | 150.0                                                         |
| Crystal system                              | triclinic                                                     |
| Space group                                 | P-1                                                           |
| a/Å                                         | 8.1900(3)                                                     |
| b/Å                                         | 10.9737(3)                                                    |
| c/Å                                         | 16.0251(5)                                                    |
| $\alpha$ /°                                 | 92.8410(10)                                                   |
| $\beta$ /°                                  | 98.8500(10)                                                   |
| $\gamma$ /°                                 | 91.3280(10)                                                   |
| Volume/Å <sup>3</sup>                       | 1420.66(8)                                                    |
| Z                                           | 4                                                             |
| $\rho_{\text{calc}}/\text{cm}^3$            | 1.348                                                         |
| $\mu/\text{mm}^{-1}$                        | 0.232                                                         |
| F (000)                                     | 608.0                                                         |
| Crystal size/mm <sup>3</sup>                | 0.12 × 0.08 × 0.05                                            |
| Radiation                                   | MoK $\alpha$ ( $\lambda$ = 0.71073)                           |
| 2 $\theta$ range for data collection/°      | 3.718 to 58.434                                               |
| Index ranges                                | -10 ≤ h ≤ 11, -13 ≤ k ≤ 15, -21 ≤ l ≤ 21                      |
| Reflections collected                       | 18935                                                         |
| Independent reflections                     | 7246 [R <sub>int</sub> = 0.0557, R <sub>sigma</sub> = 0.0745] |
| Data/restraints/parameters                  | 7246/7/365                                                    |
| Goodness-of-fit on F <sup>2</sup>           | 1.031                                                         |
| Final R indexes [I ≥ 2 $\sigma$ (I)]        | R <sub>1</sub> = 0.0571, wR <sub>2</sub> = 0.1096             |
| Final R indexes [all data]                  | R <sub>1</sub> = 0.0973, wR <sub>2</sub> = 0.1341             |
| Largest diff. peak/hole / e Å <sup>-3</sup> | 0.92/-0.53                                                    |

**Table 2** Fractional Atomic Coordinates ( $\times 10^4$ ) and Equivalent Isotropic DisplacementParameters ( $\text{\AA}^2 \times 10^3$ ) for **4a**. $U_{\text{eq}}$  is defined as 1/3 of the trace of the orthogonalised  $U_{ij}$  tensor.

| Atom | x         | y           | z          | U(eq)     |
|------|-----------|-------------|------------|-----------|
| S2   | 7201.0(8) | 3875.1(5)   | 2174.0(4)  | 25.96(15) |
| S1   | 6051.0(8) | -1200.2(6)  | 2144.7(4)  | 30.46(16) |
| O6   | 7910(2)   | 2787.0(15)  | 2523.8(11) | 34.5(4)   |
| O1   | 364(2)    | 1514.8(16)  | 611.8(12)  | 33.3(4)   |
| O4   | 12085(2)  | 6502.5(16)  | 548.5(11)  | 34.1(4)   |
| O5   | 5701(2)   | 3754.8(17)  | 1567.0(11) | 34.9(4)   |
| O2   | 5499(2)   | -2301.9(17) | 2467.2(12) | 40.6(5)   |
| O3   | 7212(2)   | -1280.2(17) | 1553.4(13) | 42.3(5)   |
| C27  | 8702(3)   | 4649(2)     | 1708.1(14) | 23.8(5)   |
| C29  | 11042(3)  | 5846(2)     | 945.8(15)  | 25.7(5)   |
| C21  | 6971(3)   | 5416(2)     | 4530.1(15) | 26.4(5)   |
| C5   | 4314(3)   | -435(2)     | 1679.8(15) | 26.9(5)   |
| C26  | 8329(3)   | 5755(2)     | 1336.5(15) | 25.6(5)   |
| C31  | 10247(3)  | 4159(2)     | 1704.9(15) | 26.6(5)   |
| C2   | 1603(3)   | 834(2)      | 990.6(15)  | 26.4(5)   |
| C30  | 11427(3)  | 4756(2)     | 1323.0(15) | 27.3(5)   |
| C24  | 7271(3)   | 4645(2)     | 3794.5(16) | 28.1(5)   |
| C13  | 9049(3)   | 1867(2)     | 5941.4(16) | 30.4(6)   |
| C20  | 5823(3)   | 6332(2)     | 4479.0(16) | 29.3(5)   |
| C18  | 6542(3)   | 6871(2)     | 5976.0(16) | 30.3(6)   |
| C28  | 9493(3)   | 6348(2)     | 957.4(16)  | 27.7(5)   |
| C6   | 2738(3)   | -857(2)     | 1744.4(15) | 28.7(5)   |
| C19  | 5597(3)   | 7036(2)     | 5194.5(16) | 31.1(6)   |
| C7   | 1366(3)   | -224(2)     | 1403.2(15) | 27.4(5)   |
| C23  | 7680(3)   | 5950(2)     | 6022.9(16) | 34.0(6)   |
| C22  | 7877(3)   | 5224(2)     | 5319.2(16) | 32.3(6)   |
| C25  | 6796(3)   | 4881(2)     | 2991.7(15) | 27.2(5)   |
| C12  | 9550(3)   | 2054(2)     | 5167.6(17) | 34.2(6)   |
| C3   | 3192(3)   | 1262(2)     | 928.6(18)  | 33.6(6)   |
| C10  | 7745(3)   | 407(2)      | 4486.7(17) | 32.5(6)   |
| C1   | -1279(3)  | 1212(2)     | 747.3(17)  | 33.3(6)   |
| C14  | 7907(4)   | 921(2)      | 5970.9(18) | 38.9(6)   |
| C11  | 8893(3)   | 1344(2)     | 4446.1(17) | 35.2(6)   |
| C4   | 4541(3)   | 637(2)      | 1269.3(18) | 35.1(6)   |

|     |          |         |            |         |
|-----|----------|---------|------------|---------|
| C15 | 7286(3)  | 196(2)  | 5263.1(18) | 39.1(6) |
| C32 | 13722(3) | 6072(3) | 555.1(18)  | 40.1(7) |
| C8  | 6985(3)  | -165(2) | 2959.9(18) | 37.5(6) |
| C9  | 6986(4)  | -396(3) | 3746.2(18) | 39.0(6) |
| C17 | 6324(4)  | 7660(3) | 6749.0(18) | 42.6(7) |
| C16 | 9724(4)  | 2640(3) | 6725.0(18) | 42.1(7) |

**Table 3** Anisotropic Displacement Parameters ( $\text{\AA}^2 \times 10^3$ ) for **4a**.

The Anisotropic displacement factor exponent takes the form:

$$-2\pi^2[h^2a^*{}^2U_{11}+2hka^*b^*U_{12}+\dots].$$

| Atom | U <sub>11</sub> | U <sub>22</sub> | U <sub>33</sub> | U <sub>23</sub> | U <sub>13</sub> | U <sub>12</sub> |
|------|-----------------|-----------------|-----------------|-----------------|-----------------|-----------------|
| S2   | 33.5(3)         | 22.5(3)         | 22.5(3)         | -1.3(2)         | 7.7(2)          | -2.3(2)         |
| S1   | 35.1(4)         | 25.8(3)         | 28.6(3)         | -2.9(3)         | -0.2(3)         | 5.5(2)          |
| O6   | 51.9(12)        | 22.8(9)         | 31.9(10)        | 4.5(8)          | 15.3(8)         | 5.1(8)          |
| O1   | 28.1(9)         | 34.0(10)        | 38.5(10)        | 8.2(8)          | 5.3(8)          | 4.6(7)          |
| O4   | 27.3(9)         | 40.0(10)        | 38.0(10)        | 10.4(9)         | 11.6(8)         | 2.4(8)          |
| O5   | 33.4(10)        | 41.4(10)        | 28.8(10)        | -1.5(8)         | 3.8(8)          | -10.3(8)        |
| O2   | 47.3(12)        | 34.0(10)        | 40.3(11)        | 9.3(9)          | 3.3(9)          | 4.6(8)          |
| O3   | 38.2(11)        | 40.0(11)        | 50.7(12)        | 4.2(10)         | 11.9(9)         | 10.3(9)         |
| C27  | 26.9(12)        | 24.9(11)        | 19.7(11)        | -1.0(9)         | 4.2(9)          | 0.1(9)          |
| C29  | 25.8(12)        | 29.1(12)        | 22.3(12)        | -0.9(10)        | 4.7(9)          | -1.5(9)         |
| C21  | 33.7(13)        | 22.6(11)        | 24.1(12)        | 0.3(10)         | 9.8(10)         | -4.6(10)        |
| C5   | 30.9(13)        | 26.2(12)        | 23.1(12)        | -2.8(10)        | 3.5(10)         | 3.1(10)         |
| C26  | 23.4(12)        | 25.6(12)        | 28.3(13)        | 1.8(10)         | 5.5(9)          | 2.9(9)          |
| C31  | 34.5(13)        | 23.0(11)        | 21.7(12)        | 1.5(10)         | 2.3(10)         | 3.3(10)         |
| C2   | 30.5(13)        | 26.1(12)        | 21.9(12)        | -2.4(10)        | 3.1(9)          | 1.0(10)         |
| C30  | 25.2(12)        | 30.3(12)        | 26.7(13)        | -0.2(10)        | 4.4(10)         | 6.9(10)         |
| C24  | 32.7(13)        | 23.1(12)        | 29.3(13)        | 1.2(10)         | 7.5(10)         | -0.4(10)        |
| C13  | 35.3(14)        | 25.3(12)        | 28.5(13)        | 0.0(11)         | -1.7(10)        | 1.5(10)         |
| C20  | 34.3(14)        | 27.2(12)        | 26.3(13)        | 1.6(10)         | 5.1(10)         | -3.4(10)        |
| C18  | 38.4(14)        | 25.1(12)        | 28.6(13)        | -3.9(11)        | 11.3(11)        | -5.4(10)        |
| C28  | 27.3(13)        | 25.3(12)        | 31.3(13)        | 5.2(10)         | 4.8(10)         | 5.0(9)          |
| C6   | 37.1(14)        | 25.2(12)        | 24.5(12)        | 3.5(10)         | 6.4(10)         | -0.1(10)        |
| C19  | 34.5(14)        | 25.9(12)        | 34.1(14)        | -0.2(11)        | 9.8(11)         | -0.1(10)        |
| C7   | 28.9(13)        | 29.1(12)        | 24.5(12)        | -0.7(10)        | 6.3(10)         | -3.8(10)        |
| C23  | 42.9(15)        | 36.7(14)        | 21.6(13)        | -0.4(11)        | 3.5(11)         | -1.9(12)        |
| C22  | 38.5(15)        | 29.5(13)        | 29.3(14)        | -0.5(11)        | 6.3(11)         | 4.0(11)         |
| C25  | 31.2(13)        | 23.2(11)        | 28.0(13)        | -0.3(10)        | 8.2(10)         | -1.2(10)        |
| C12  | 37.6(15)        | 28.1(13)        | 37.2(15)        | 2.8(11)         | 7.0(12)         | -1.0(11)        |
| C3   | 32.8(14)        | 26.8(13)        | 42.2(16)        | 9.0(12)         | 6.9(11)         | 0.0(10)         |
| C10  | 33.3(14)        | 25.8(12)        | 35.0(15)        | -2.5(11)        | -5.2(11)        | 8.6(10)         |
| C1   | 28.7(13)        | 40.3(15)        | 32.1(14)        | 3.2(12)         | 7.6(11)         | 4.0(11)         |
| C14  | 48.2(17)        | 36.4(15)        | 32.1(15)        | -4.7(12)        | 9.6(12)         | -7.0(12)        |
| C11  | 45.1(16)        | 35.3(14)        | 26.7(13)        | 5.4(11)         | 8.2(11)         | 11.5(12)        |
| C4   | 29.8(14)        | 29.6(13)        | 46.6(17)        | 4.0(12)         | 8.3(12)         | -3.7(10)        |



|     |          |          |          |          |          |          |
|-----|----------|----------|----------|----------|----------|----------|
| C15 | 40.8(16) | 32.3(14) | 43.3(17) | -4.2(13) | 6.8(13)  | -6.3(12) |
| C32 | 25.9(14) | 55.3(18) | 41.1(16) | 6.8(14)  | 10.0(11) | 2.5(12)  |
| C8  | 40.4(15) | 30.9(13) | 39.7(15) | 0.8(12)  | 1.6(12)  | 3.9(11)  |
| C9  | 44.6(16) | 32.1(14) | 40.3(16) | 3.0(12)  | 5.2(13)  | 8.6(12)  |
| C17 | 56.1(19) | 39.9(16) | 32.8(15) | -9.9(13) | 14.0(13) | -1.9(13) |
| C16 | 53.7(18) | 37.2(15) | 32.8(15) | -6.3(13) | 2.5(13)  | -6.5(13) |

**Table 4 Bond Lengths for 4a.**

| <b>Atom</b> | <b>Atom</b> | <b>Length/Å</b> | <b>Atom</b> | <b>Atom</b> | <b>Length/Å</b> |
|-------------|-------------|-----------------|-------------|-------------|-----------------|
| S2          | O6          | 1.4407(18)      | C26         | C28         | 1.374(3)        |
| S2          | O5          | 1.4439(18)      | C31         | C30         | 1.389(3)        |
| S2          | C27         | 1.757(2)        | C2          | C7          | 1.389(3)        |
| S2          | C25         | 1.747(2)        | C2          | C3          | 1.393(3)        |
| S1          | O2          | 1.4288(19)      | C24         | C25         | 1.326(3)        |
| S1          | O3          | 1.443(2)        | C13         | C12         | 1.388(4)        |
| S1          | C5          | 1.754(2)        | C13         | C14         | 1.388(4)        |
| S1          | C8          | 1.757(3)        | C13         | C16         | 1.504(3)        |
| O1          | C2          | 1.359(3)        | C20         | C19         | 1.389(3)        |
| O1          | C1          | 1.430(3)        | C18         | C19         | 1.390(4)        |
| O4          | C29         | 1.356(3)        | C18         | C23         | 1.388(4)        |
| O4          | C32         | 1.430(3)        | C18         | C17         | 1.511(3)        |
| C27         | C26         | 1.398(3)        | C6          | C7          | 1.388(3)        |
| C27         | C31         | 1.387(3)        | C23         | C22         | 1.380(3)        |
| C29         | C30         | 1.389(3)        | C12         | C11         | 1.391(4)        |
| C29         | C28         | 1.396(3)        | C3          | C4          | 1.369(4)        |
| C21         | C24         | 1.472(3)        | C10         | C11         | 1.387(4)        |
| C21         | C20         | 1.388(3)        | C10         | C15         | 1.382(4)        |
| C21         | C22         | 1.393(3)        | C10         | C9          | 1.489(4)        |
| C5          | C6          | 1.381(3)        | C14         | C15         | 1.376(4)        |
| C5          | C4          | 1.399(4)        | C8          | C9          | 1.297(4)        |

**Table 5** Bond Angles for **4a**.

| Atom | Atom | Atom | Angle/°    | Atom | Atom | Atom | Angle/°  |
|------|------|------|------------|------|------|------|----------|
| O6   | S2   | O5   | 118.56(11) | O1   | C2   | C3   | 114.9(2) |
| O6   | S2   | C27  | 108.49(11) | C7   | C2   | C3   | 120.6(2) |
| O6   | S2   | C25  | 109.54(11) | C29  | C30  | C31  | 119.3(2) |
| O5   | S2   | C27  | 108.13(11) | C25  | C24  | C21  | 125.5(2) |
| O5   | S2   | C25  | 106.65(11) | C12  | C13  | C14  | 117.4(2) |
| C25  | S2   | C27  | 104.59(11) | C12  | C13  | C16  | 121.9(2) |
| O2   | S1   | O3   | 118.50(12) | C14  | C13  | C16  | 120.7(2) |
| O2   | S1   | C5   | 108.44(12) | C21  | C20  | C19  | 120.8(2) |
| O2   | S1   | C8   | 111.78(13) | C19  | C18  | C17  | 121.1(2) |
| O3   | S1   | C5   | 108.54(12) | C23  | C18  | C19  | 117.7(2) |
| O3   | S1   | C8   | 104.94(13) | C23  | C18  | C17  | 121.2(2) |
| C5   | S1   | C8   | 103.60(12) | C26  | C28  | C29  | 120.1(2) |
| C2   | O1   | C1   | 117.31(19) | C5   | C6   | C7   | 120.5(2) |
| C29  | O4   | C32  | 117.7(2)   | C20  | C19  | C18  | 121.2(2) |
| C26  | C27  | S2   | 119.76(18) | C6   | C7   | C2   | 118.9(2) |
| C31  | C27  | S2   | 120.05(18) | C22  | C23  | C18  | 121.4(2) |
| C31  | C27  | C26  | 120.2(2)   | C23  | C22  | C21  | 120.9(2) |
| O4   | C29  | C30  | 124.5(2)   | C24  | C25  | S2   | 121.0(2) |
| O4   | C29  | C28  | 115.0(2)   | C13  | C12  | C11  | 121.1(2) |
| C30  | C29  | C28  | 120.5(2)   | C4   | C3   | C2   | 120.2(2) |
| C20  | C21  | C24  | 123.3(2)   | C11  | C10  | C9   | 124.0(3) |
| C20  | C21  | C22  | 118.0(2)   | C15  | C10  | C11  | 118.2(2) |
| C22  | C21  | C24  | 118.8(2)   | C15  | C10  | C9   | 117.8(2) |
| C6   | C5   | S1   | 120.62(19) | C15  | C14  | C13  | 121.7(3) |
| C6   | C5   | C4   | 120.1(2)   | C10  | C11  | C12  | 120.7(3) |
| C4   | C5   | S1   | 119.21(19) | C3   | C4   | C5   | 119.6(2) |
| C28  | C26  | C27  | 119.7(2)   | C14  | C15  | C10  | 120.9(3) |
| C27  | C31  | C30  | 120.2(2)   | C9   | C8   | S1   | 120.6(2) |
| O1   | C2   | C7   | 124.5(2)   | C8   | C9   | C10  | 125.3(3) |

**Table 6** Hydrogen Atom Coordinates ( $\text{\AA}\times 10^4$ ) and Isotropic Displacement Parameters $(\text{\AA}^2\times 10^3)$  for **4a**.

| Atom | x        | y        | z       | U(eq) |
|------|----------|----------|---------|-------|
| H26  | 7275.95  | 6096.36  | 1346.05 | 31    |
| H31  | 10499.79 | 3412.41  | 1964.86 | 32    |
| H30  | 12485.81 | 4421.29  | 1319.89 | 33    |
| H24  | 7852.97  | 3917.11  | 3904.28 | 34    |
| H20  | 5184.73  | 6478.52  | 3948.47 | 35    |
| H28  | 9243.88  | 7098.52  | 702.92  | 33    |
| H6   | 2592.21  | -1585.03 | 2024.5  | 34    |
| H19  | 4781.17  | 7641     | 5148.55 | 37    |
| H7   | 282.53   | -511.22  | 1451.05 | 33    |
| H23  | 8338.24  | 5816.55  | 6550.54 | 41    |
| H22  | 8641.79  | 4584.21  | 5373.95 | 39    |
| H25  | 6228.06  | 5608.61  | 2858.93 | 33    |
| H12  | 10356.3  | 2676.79  | 5130.24 | 41    |
| H3   | 3341.31  | 1990.5   | 648.77  | 40    |
| H1A  | -2050.96 | 1779.19  | 456.22  | 50    |
| H1B  | -1332.3  | 1273.36  | 1354.66 | 50    |
| H1C  | -1581.34 | 376.22   | 523.73  | 50    |
| H14  | 7546.49  | 769.84   | 6493.09 | 47    |
| H11  | 9232.73  | 1501.4   | 3920.1  | 42    |
| H4   | 5623.85  | 930.09   | 1227.11 | 42    |
| H15  | 6531.37  | -459.05  | 5308.38 | 47    |
| H32A | 14338.72 | 6617.55  | 241.27  | 60    |
| H32B | 13664.54 | 5246.1   | 288.26  | 60    |
| H32C | 14283.41 | 6058.21  | 1140.33 | 60    |
| H8   | 7494.62  | 570.12   | 2823.76 | 45    |
| H9   | 6459.53  | -1137.76 | 3858.27 | 47    |
| H17A | 7243.37  | 8261.55  | 6877.78 | 64    |
| H17B | 6310.23  | 7146.18  | 7231.02 | 64    |
| H17C | 5279.07  | 8083.75  | 6639.46 | 64    |
| H16A | 10682.09 | 3127.62  | 6620.14 | 63    |
| H16B | 10062.06 | 2111.25  | 7192.34 | 63    |
| H16C | 8868.76  | 3183.79  | 6873.27 | 63    |
